# Supplementary material
Source: PubMed Central journal article supplement (PMC6954108)
Supplement: NIHMS1044613-supplement-15.pdf [file NIHMS1044613-supplement-15.pdf]

# Supplemental Figure 1

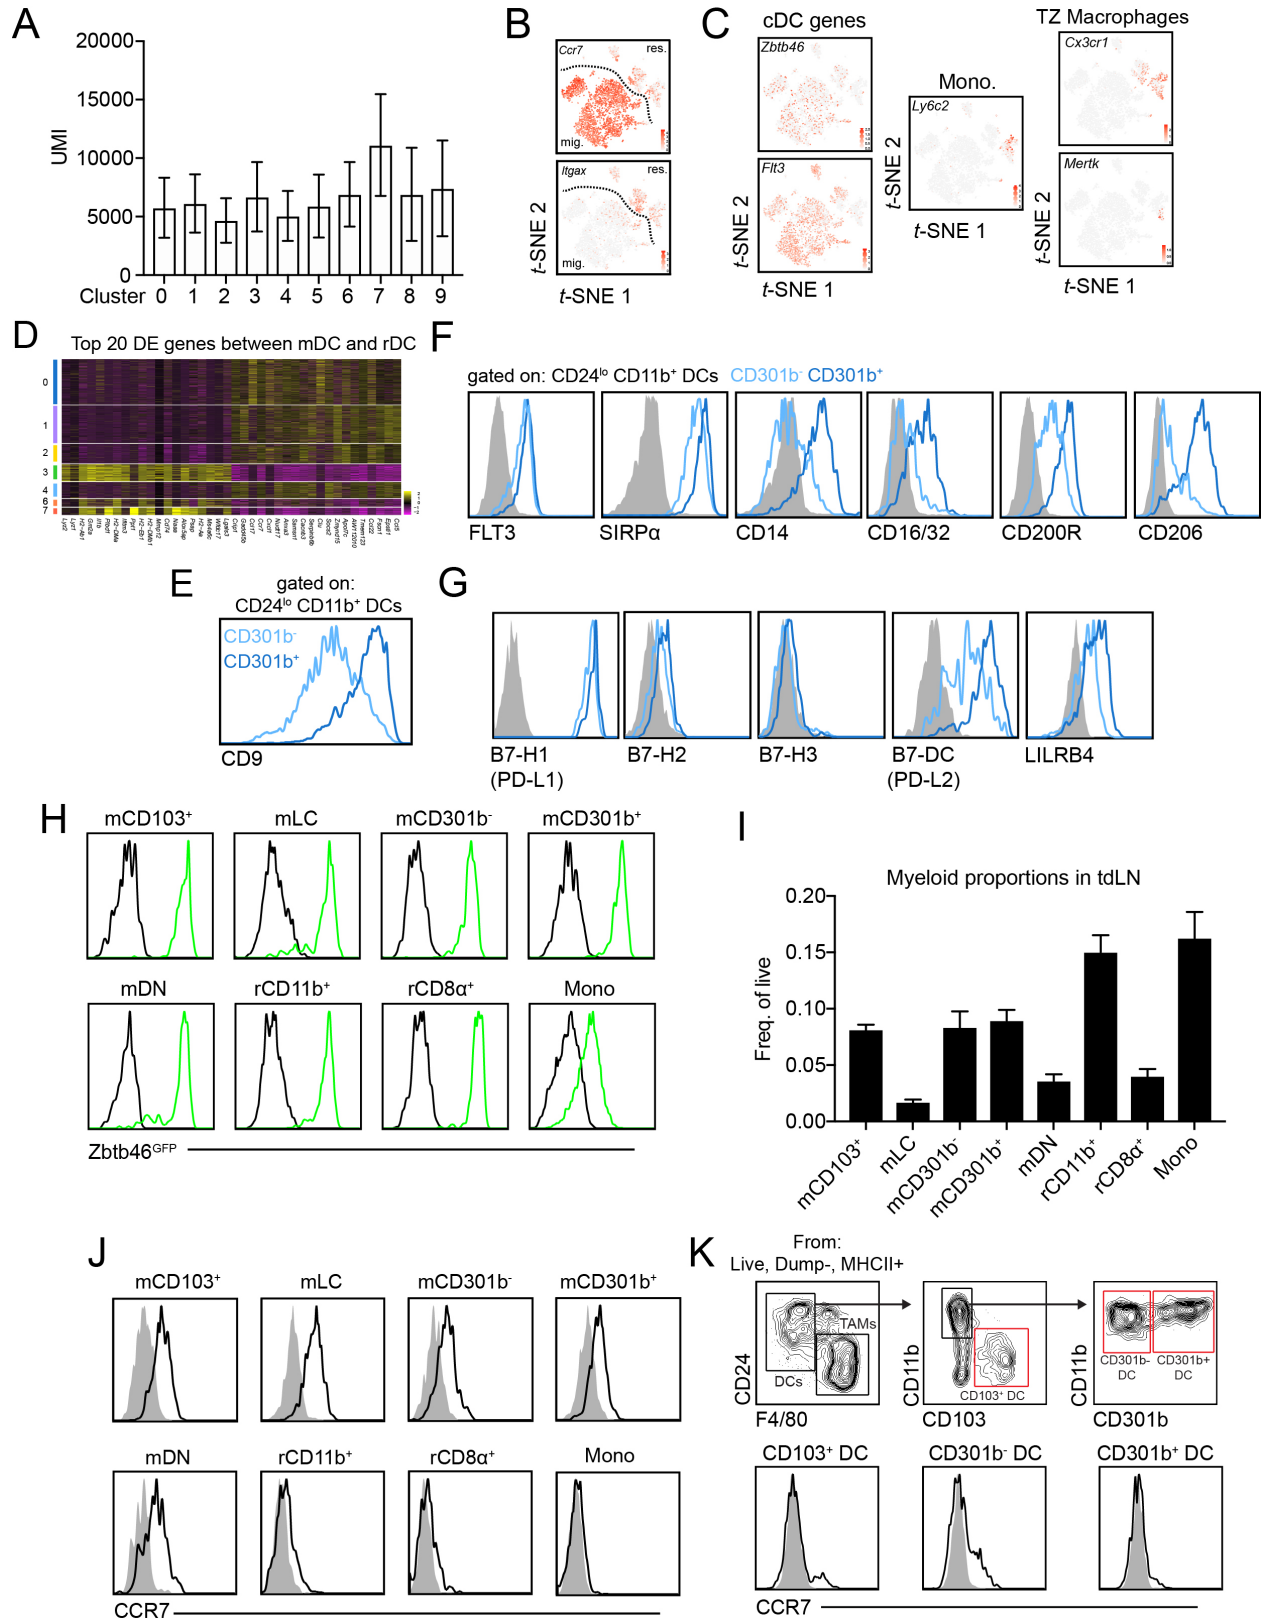

**Supplemental Figure 1** Unbiased scRNA-seq of myeloid cells in the tdLN reveals extensive heterogeneity, **relates to Figure 1**

**(A)** Average cell UMI across the 10 clusters present in the tdLN *t*-SNE (Figure 1A) with bars denoting standard deviation. **(B)** Gene expression overlay of *Ccr7* and *Itgax* plotted on the tdLN *t*-SNE. Scale bar indicates relative expression level. **(C)** Gene expression overlay of canonical cDC markers, *Zbtb46* and *Flt3* on the tdLN *t*-SNE (left), monocyte marker *Ly6c2* (middle) and T cell zone macrophage markers *Cx3cr1* and *Mertk* (right). **(D)** Heatmap displaying top 20 DE genes for mDC and rDC when clusters 0, 1, 2, 4 and 6 are compared to clusters 3 and 7 (ranked by log N fold change). **(E)** Surface expression of CD9 on CD301b<sup>-</sup> and CD301b<sup>+</sup> CD11b<sup>+</sup> CD24<sup>lo</sup> DC populations. **(F)** Surface expression of denoted cell markers on mCD301b<sup>-</sup> and mCD301b<sup>+</sup>. **(G)** Surface expression of known inhibitory receptors on mCD301b<sup>-</sup> and mCD301b<sup>+</sup>. **(H)** GFP expression in myeloid populations detected in tdLNs from tumor-bearing *Zbtb46*<sup>GFP</sup> (green) and control (black) mice. **(I)** Frequency of myeloid populations within the tdLN. **(J)** Surface levels of CCR7 on tdLN myeloid populations. **(K)** Gating strategy of myeloid populations in mouse TME (**top**) and surface expression of CCR7 on tumor DC populations (**bottom**).

## Supplemental Figure 2

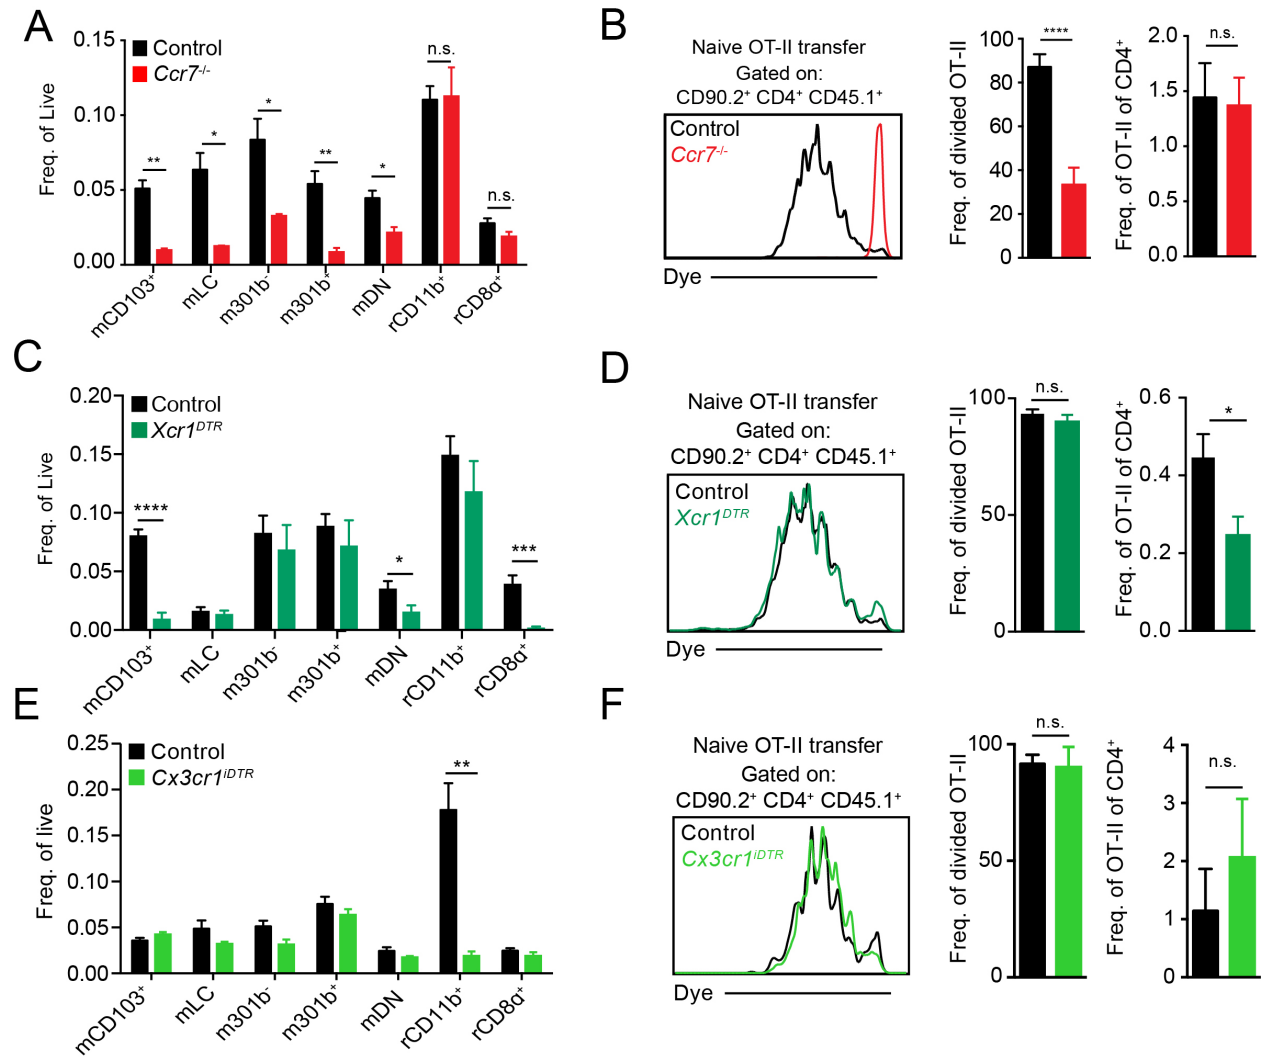

**Supplemental Figure 2** mCD301b<sup>-/+</sup> cDC2 are uniquely able to induce anti-tumor CD4<sup>+</sup> T<sub>conv</sub> proliferation but fail to initiate CD4<sup>+</sup> T<sub>conv</sub> differentiation, **relates to Figure 2**

**(A)** Frequency of tdLN DC populations in control or *Ccr7*<sup>-/-</sup> tumor-bearing mice. **(B)** Proliferation of CD45.1<sup>+</sup> CD4<sup>+</sup> OT-II T cells in tdLN that had been transferred to control or *Ccr7*<sup>-/-</sup> tumor-bearing mice 3 days prior as assessed by dye dilution (**left**), the frequency that had divided (**middle**), and their frequency of endogenous CD4<sup>+</sup> T cells (**right**). **(C)** Frequency of tdLN DC populations in control or *Xcr1*<sup>DTR</sup> tumor-bearing mice. **(D)** Proliferation of transferred CD45.1<sup>+</sup> CD4<sup>+</sup> OT-II T cells in tdLN of DT-treated control or *Xcr1*<sup>DTR</sup> tumor-bearing mice with analysis of dye dilution (**left**), the frequency that had divided (**middle**), and their frequency of endogenous CD4<sup>+</sup> T cells (**right**) 3 days post-transfer. **(E)** Frequency of tdLN DC populations in DT-treated control or *Cx3cr1*<sup>iDTR</sup> tumor-bearing mice. **(F)** Proliferation of transferred CD45.1<sup>+</sup> CD4<sup>+</sup> OT-II T cells in tdLN of DT-treated control or *Cx3cr1*<sup>iDTR</sup> tumor-bearing mice with analysis of dye dilution (**left**), the frequency that had divided (**middle**), and their frequency of endogenous CD4<sup>+</sup> T cells (**right**) 3 days post-transfer. Data are represented as average ± SEM unless explicitly specified. \*P <0.05, \*\*P<0.01, \*\*\*P<0.001, \*\*\*\*P<0.0001.

### Supplemental Figure 3

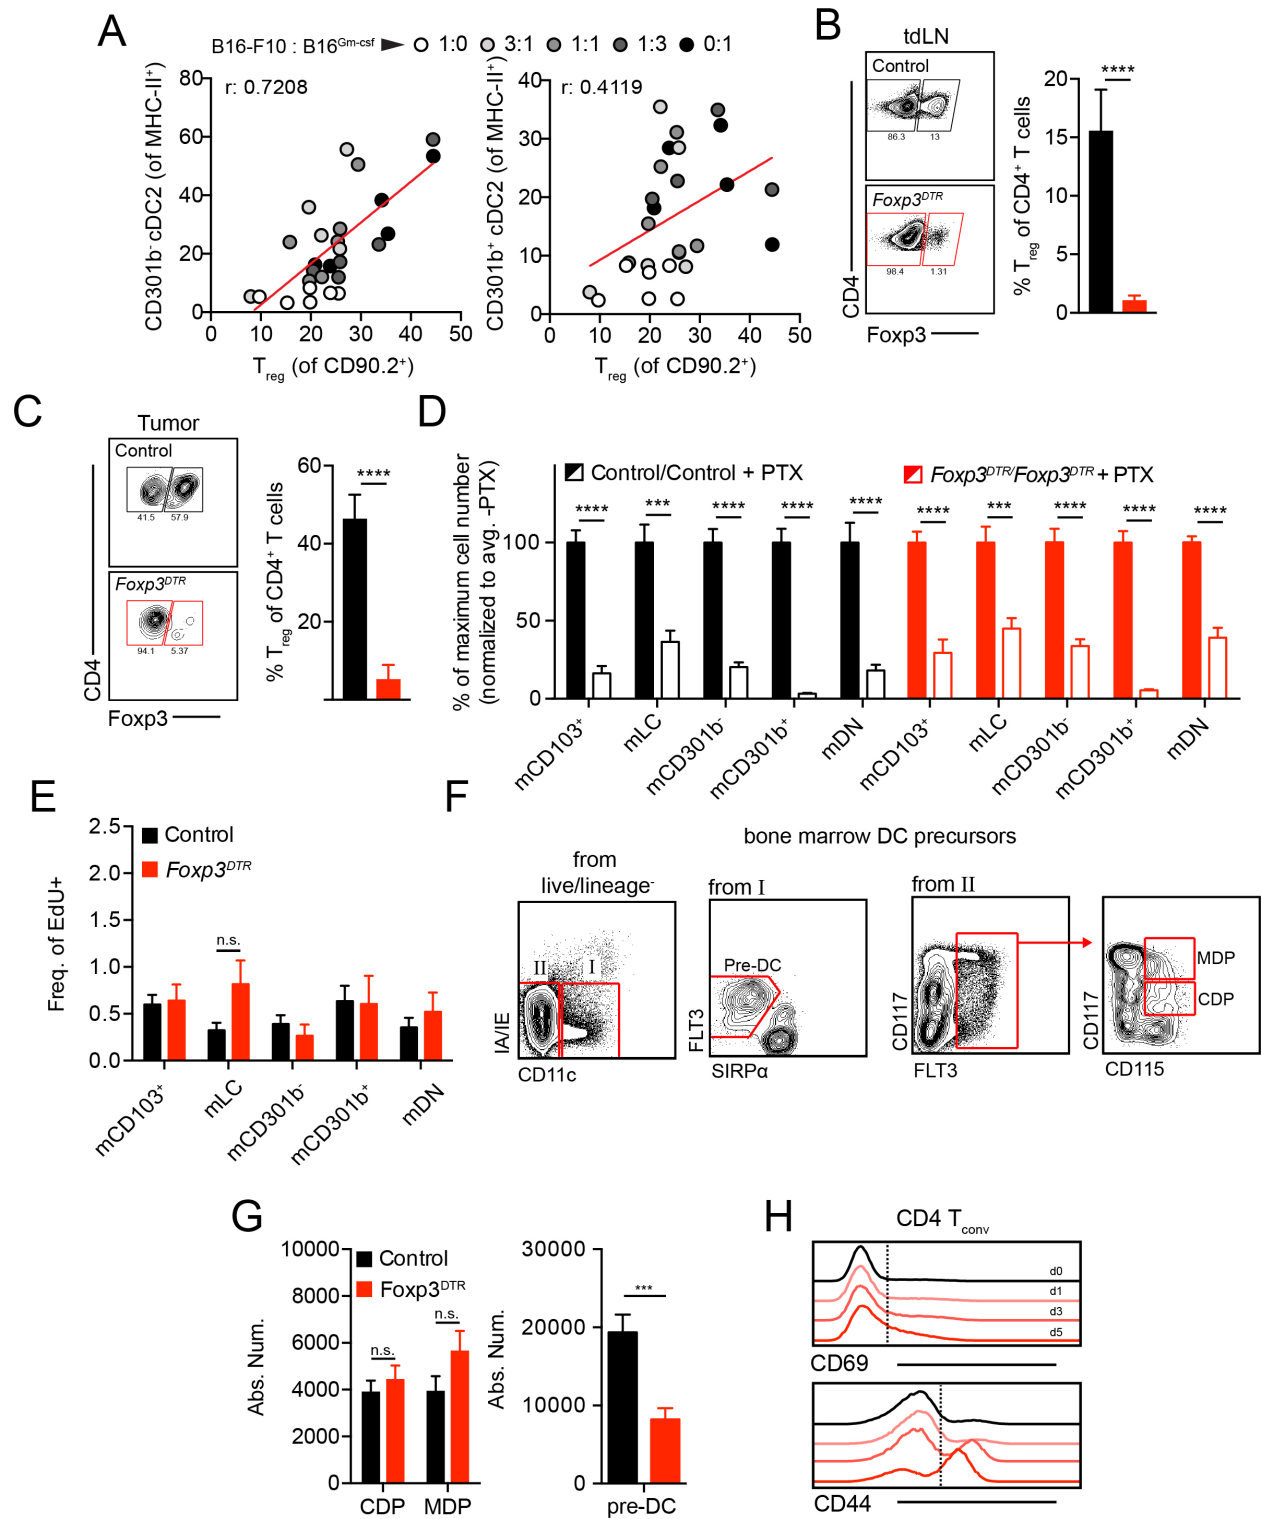

**Supplemental Figure 3** Regulatory T cell depletion enhances cDC2 migration to the tdLN and unleashes an anti-tumor CD4<sup>+</sup> T<sub>conv</sub> response, **related to Figure 3.**

**(A)** Dot plot correlation of intratumoral CD11b<sup>+</sup> CD301b<sup>-</sup> cDC2 frequency within MHC-II<sup>+</sup> cells (**left**) or CD11b<sup>+</sup> CD301b<sup>-</sup> cDC2 within MHC-II<sup>+</sup> (**right**) and T<sub>reg</sub> frequency within CD90.2<sup>+</sup> T cells. Best fit line shown. Pearson correlation performed for r value. Data pooled from two experiments. **(B,C)** Gating example of FoxP3 expression in CD4<sup>+</sup> T cells of DT-treated control and *Foxp3<sup>DTR</sup>* mice and the frequency of FoxP3<sup>+</sup> T<sub>reg</sub> within CD4<sup>+</sup> T cells in the **(B)** tdLN or **(C)** tumor. **(D)** Control and *Foxp3<sup>DTR</sup>* B16-F10 tumor-bearing mice were treated with DT and PTX and absolute number of migratory DC in the tdLN were analyzed at day 5 post-DT. Samples normalized to their genetic -PTX condition. Representative data of two independent experiments displayed. **(E)** Frequency of EdU incorporation after 2 hours within migratory DC from tumor-bearing control and *Foxp3<sup>DTR</sup>* mice 2 days post-DT administration. **(F)** Representative gating scheme for DC precursors in mouse bone marrow. **(G)** Absolute numbers of DC precursors in bone marrow of tumor-bearing control and *Foxp3<sup>DTR</sup>* animals 5 days after DT administration. **(H)** Representative histograms of CD69 and CD44 surface levels from data in Figure 3H. Data are represented as  $\pm$  SEM. \*P < 0.05, \*\*P < 0.01, \*\*\*P < 0.001, \*\*\*\*P < 0.0001.

Supplemental Figure 4

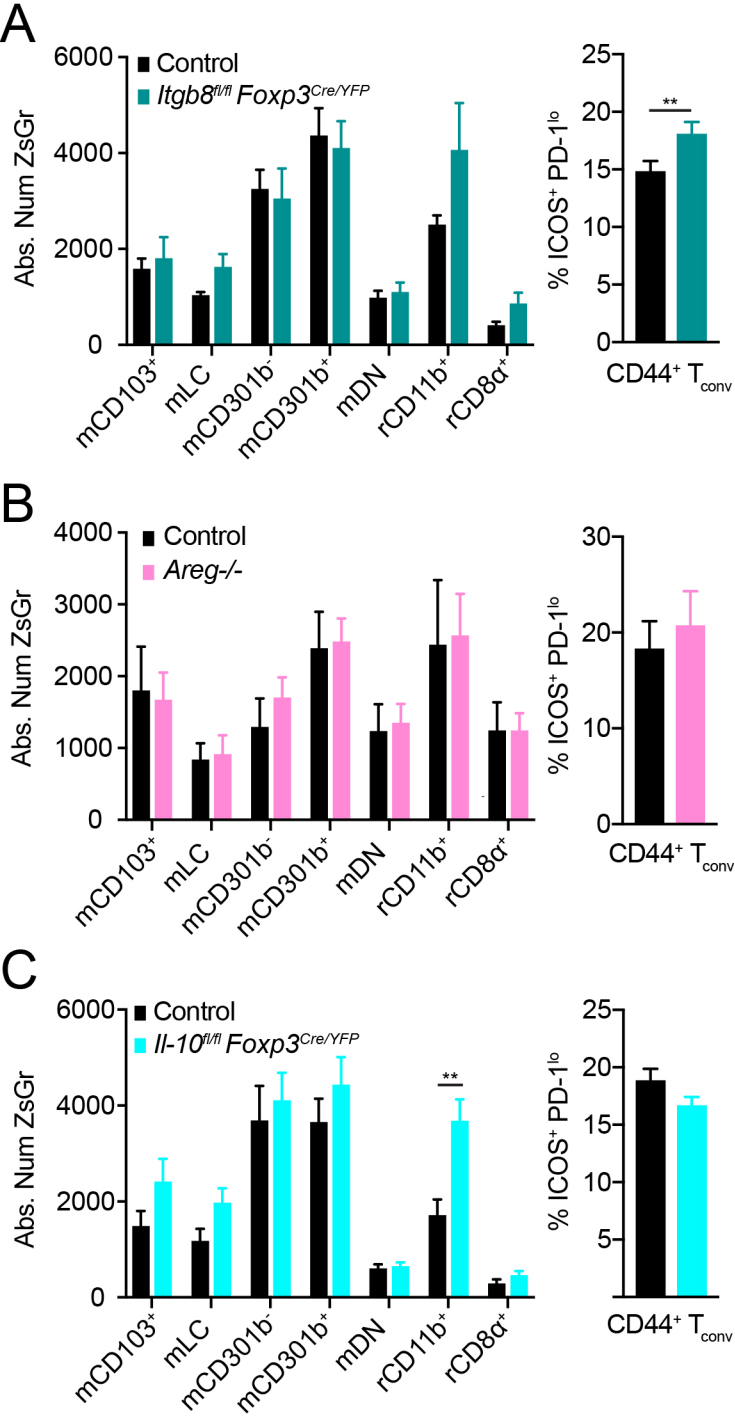

**Supplementary Figure 4** Regulatory T cell depletion enhances cDC2 function and CD4<sup>+</sup> T<sub>conv</sub> differentiation, related to Figure 3 and Figure 4.

**(A)** Analysis of immune populations in tdLN from B16<sup>ZsGreen</sup> tumor-bearing control and *Itgb8<sup>fl/fl</sup>Foxp3<sup>CreYFP</sup>* mice. Absolute number of ZsGreen<sup>+</sup> DC populations (left) and frequency of CD44<sup>+</sup> CD4<sup>+</sup> T<sub>conv</sub> with ICOS<sup>+</sup> PD-1<sup>lo</sup> surface phenotype (right). **(B)** Analysis of immune populations in tdLN from B16<sup>ZsGreen</sup> tumor-bearing control and *Areg<sup>-/-</sup>* mice. Absolute number of ZsGreen<sup>+</sup> DC populations (left) and frequency of CD44<sup>+</sup> CD4<sup>+</sup> T<sub>conv</sub> with ICOS<sup>+</sup> PD-1<sup>lo</sup> surface phenotype (right). **(C)** Analysis of immune populations in tdLN from B16<sup>ZsGreen</sup> tumor-bearing control and *Il-10<sup>fl/fl</sup>Foxp3<sup>CreYFP</sup>* mice. Absolute number of ZsGreen<sup>+</sup> DC populations (left) and frequency of CD44<sup>+</sup> CD4<sup>+</sup> T<sub>conv</sub> with ICOS<sup>+</sup> PD-1<sup>lo</sup> surface phenotype (right).

**Supplemental Figure 4**



## Supplemental Figure 5

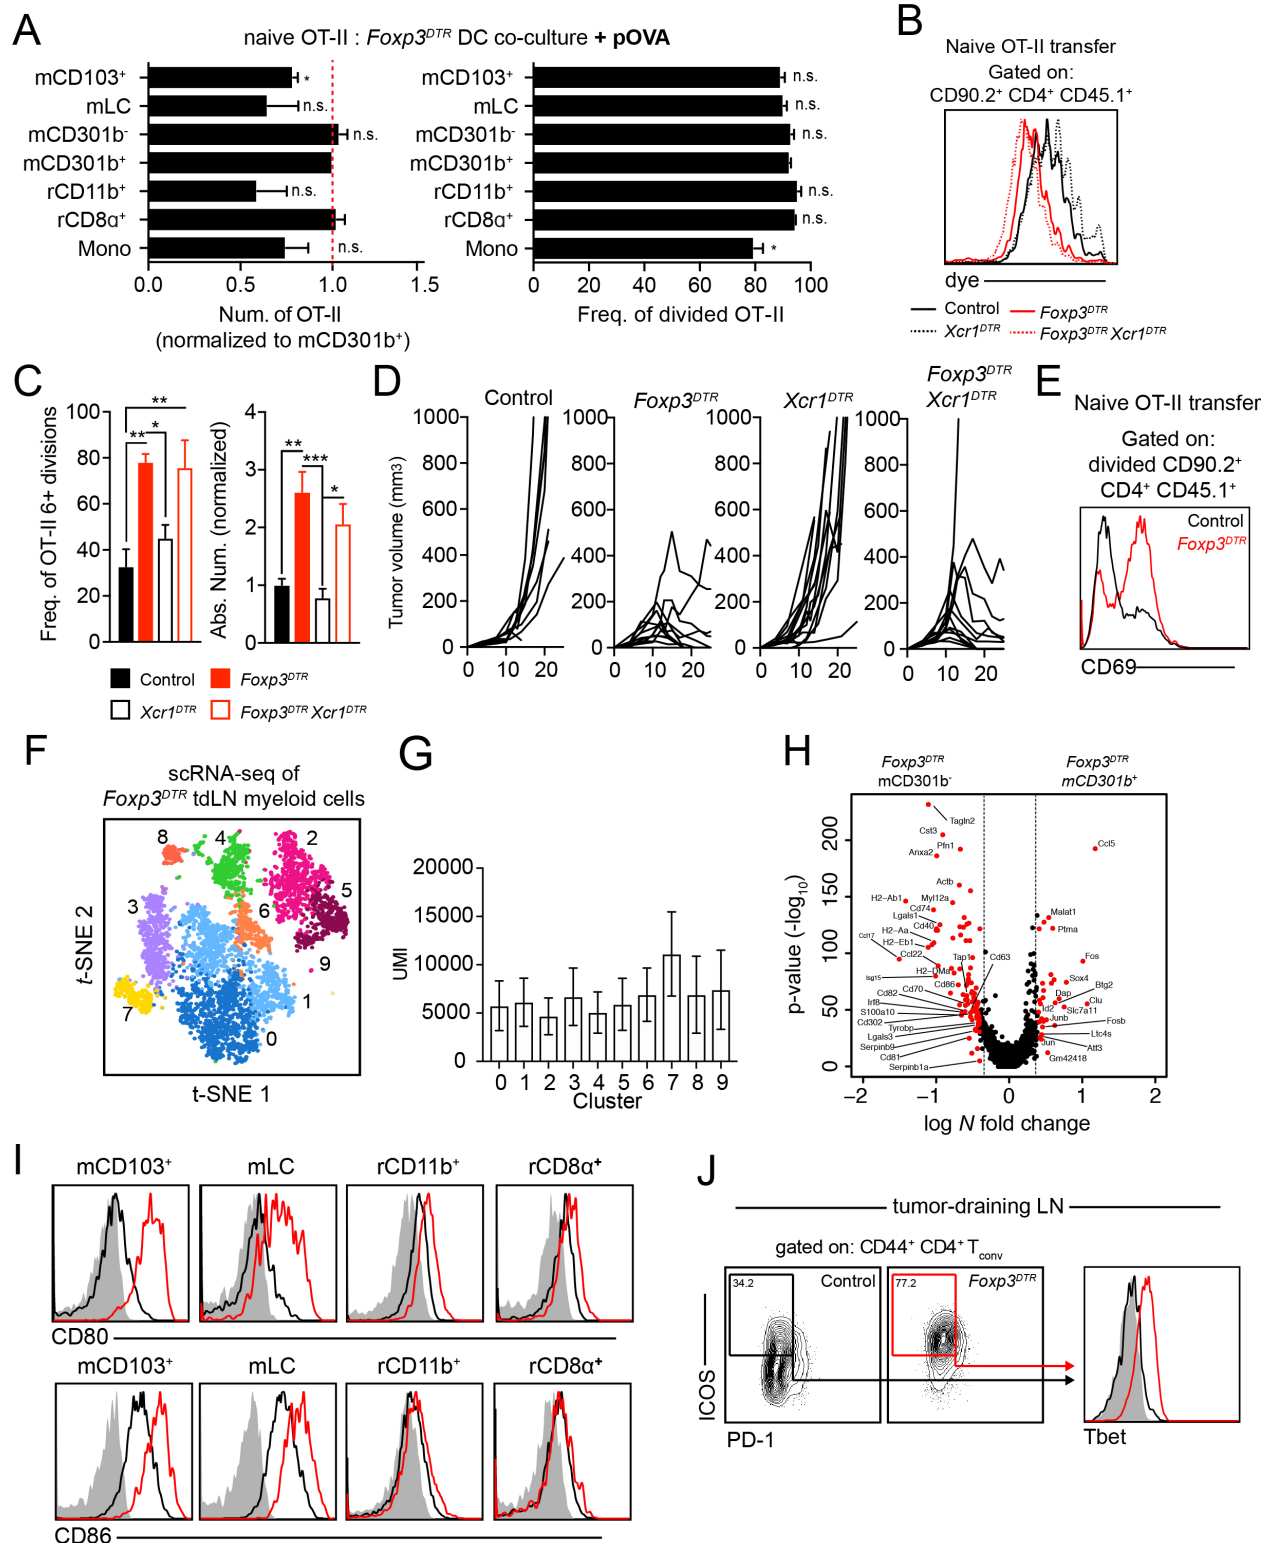

**Supplementary Figure 5** Regulatory T cell depletion enhances cDC2 function and CD4<sup>+</sup> T<sub>conv</sub> differentiation, **related to Figure 4.**

**(A)** OT-II T cells were co-cultured with APC populations sorted from DT-treated *Foxp3<sup>DTR</sup>* tdLN in media containing exogenous OVA peptide (323-339) and analyzed 3 days later for the absolute number of live (**left**) OT-II T cells recovered and the frequency of cells that had divided (**right**). Data was normalized and statistically compared to mCD301b<sup>+</sup> condition. **(B)** Proliferation of CD45.1<sup>+</sup> CD4<sup>+</sup> OT-II T cells in tdLN that had been transferred to control, *Foxp3<sup>DTR</sup>*, *Xcr1<sup>DTR</sup>*, or *Foxp3<sup>DTR</sup>Xcr1<sup>DTR</sup>* tumor-bearing mice 3 days prior as assessed by dye dilution (**left**). Frequency of OT-II that divided 6+ times (**middle**). The absolute number of transferred OT-II (**right**). **(C)** Tumor growth from control, *Foxp3<sup>DTR</sup>*, *Xcr1<sup>DTR</sup>* and *Foxp3<sup>DTR</sup>Xcr1<sup>DTR</sup>* mice. Results depict tumor growth curves of individual mice. **(D)** Cell surface CD69 levels on divided OT-II T cells 3 days after transfer into DT-treated control and *Foxp3<sup>DTR</sup>* B16<sup>ChOVA</sup> tumor-bearing mice. Representative data of three independent experiments displayed. **(E)** *t*-SNE plot and graph-based clustering of CD90.2<sup>-</sup> B220<sup>-</sup> NK1.1<sup>-</sup> CD11b<sup>+</sup> and/or CD11c<sup>+</sup> myeloid cells sorted from a DT-treated *Foxp3<sup>DTR</sup>* B16F10 tdLN and processed for scRNA-seq. Each dot represents a single cell. **(F)** Average cell UMI across the 10 clusters present in the primary *Foxp3<sup>DTR</sup>* tdLN *t*-SNE from Supplemental **Figure 6E** with bars denoting standard deviation. **(G)** *t*-SNE display and graph-based clustering of aggregated control and *Foxp3<sup>DTR</sup>* tdLN sequenced cells (**left**). Cellular origin within the aggregated *t*-SNE highlighted (**middle, right**). **(H)** Volcano plots displaying DE expressed genes comparing *Foxp3<sup>DTR</sup>* tdLN mCD301b<sup>-</sup> and mCD301b<sup>+</sup>. Log *N* fold cutoff of 0.4 used. Genes of interest labelled. **(I)** Cell surface levels of CD80 (**left**) and CD86 (**right**) on mCD103<sup>+</sup>, mLC, rCD11b<sup>+</sup> and mCD8α<sup>+</sup> in control and *Foxp3<sup>DTR</sup>* tdLN.

## Supplemental Figure 6

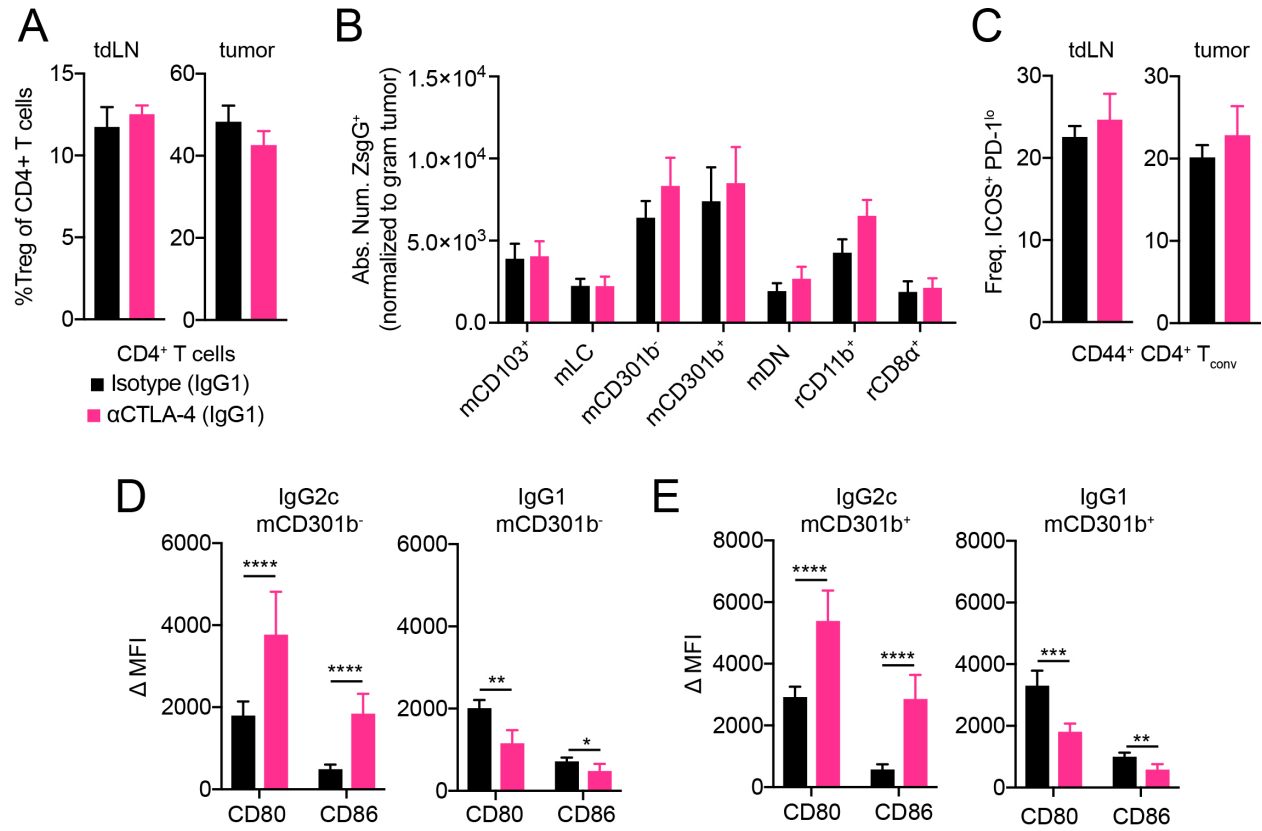

**Supplemental Figure 6** Anti-CTLA-4 induces expansion and functional enhancement of CD11b<sup>+</sup> cDC2, related to **Figure 5**

(A) Frequency of T<sub>reg</sub> within CD4<sup>+</sup> T cells in tdLN (left) or tumor (right) from B16<sup>ZsGreen</sup> tumor-bearing mice treated with mouse IgG1 isotype or anti-CTLA-4 with a mouse IgG1 Fc. (B) Absolute number of ZsGreen<sup>+</sup> DC in tdLN (normalized to weight of associated tumor). (C) Frequency of CD44<sup>+</sup> CD4<sup>+</sup> T<sub>conv</sub> with ICOS<sup>+</sup> PD-1<sup>lo</sup> surface phenotype in tdLN (left) or tumor (right). (D)  $\Delta$ MFI (CD80/CD86 MFI – Isotype MFI) from mCD301b<sup>-</sup> from tdLN of B16<sup>ZsGreen</sup> tumor-bearing mice treated with either Isotype/anti-CTLA-4 IgG2c (left) or Isotype/anti-CTLA-4 IgG1 (right). (E)  $\Delta$ MFI (CD80/CD86 MFI – Isotype MFI) from mCD301b<sup>+</sup> from tdLN of B16<sup>ZsGreen</sup> tumor-bearing mice treated with either Isotype/anti-CTLA-4 IgG2c (left) or Isotype/anti-CTLA-4 IgG1 (right).

Supplemental Figure 7

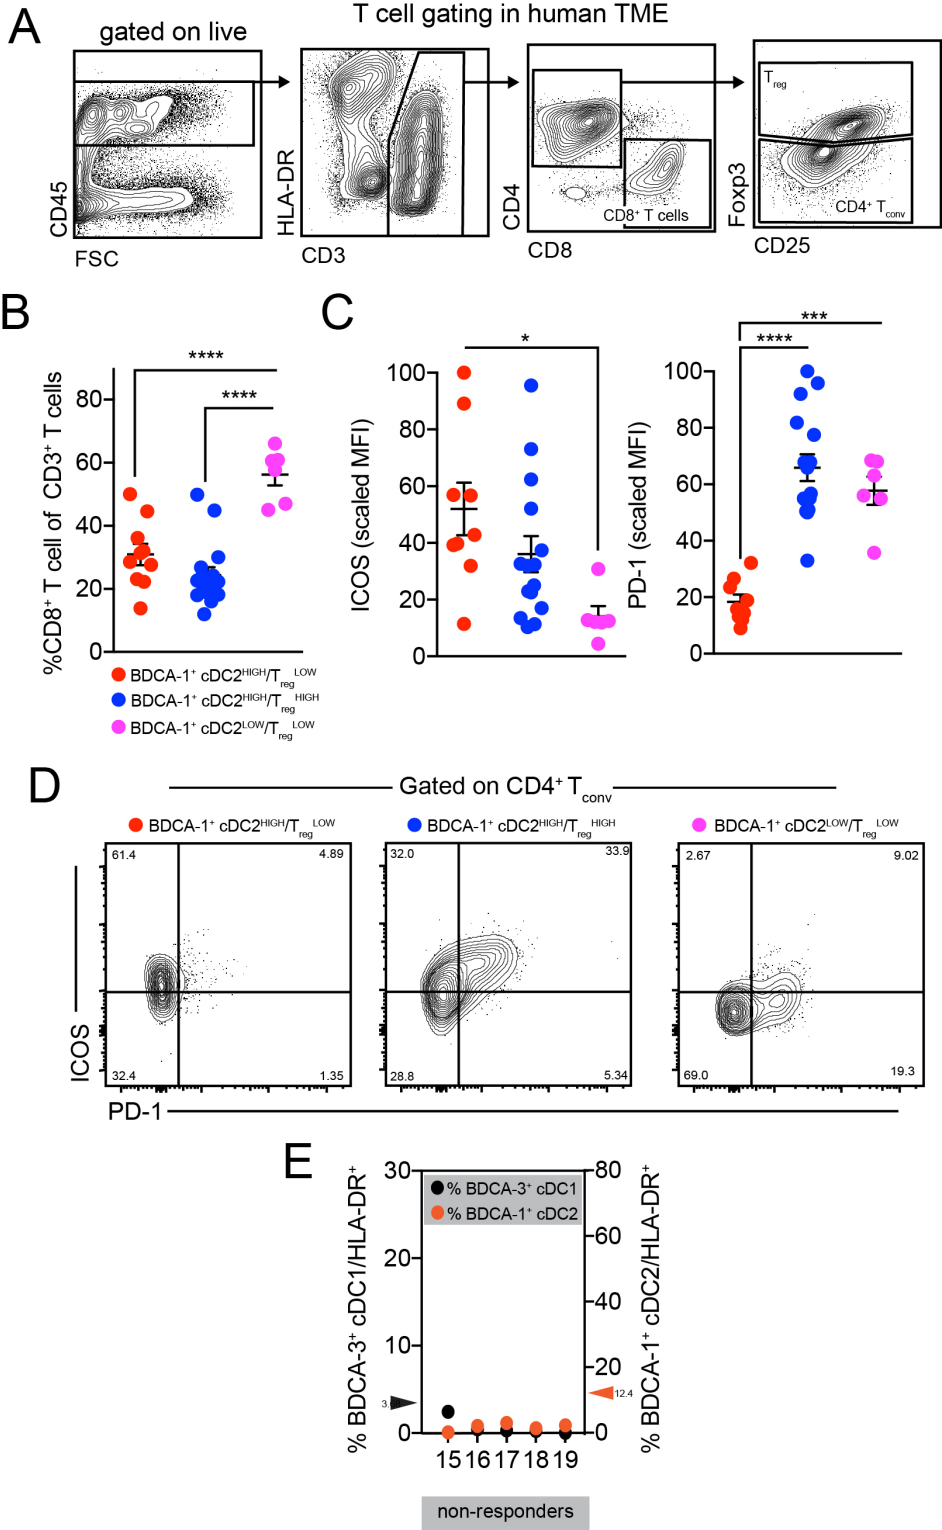

**Supplementary Figure 7** BDCA-1<sup>+</sup> cDC2 proportion in the human TME impacts CD4<sup>+</sup> T<sub>conv</sub> proportion and quality, **related to Figure 7**

**(A)** Gating strategy of human HNSC TME to identify T cell populations. **(B)** Frequency of CD8<sup>+</sup> T cells (of CD3<sup>+</sup> T cells) within each type of HNSC TME identified in Figure 7A. **(C)** Scaled ICOS (**left**) and PD-1 (**right**) MFI on CD4<sup>+</sup> T<sub>conv</sub> within each type of HNSC TME identified in Figure 7A (**left**). **(D)** Representative example of ICOS and PD-1 expression on CD4<sup>+</sup> T<sub>conv</sub> within each HNSC TME subset. **(E)** Frequency of BDCA-3<sup>+</sup> cDC1 (black) and BDCA-1<sup>+</sup> cDC2 (orange) within HLA-DR<sup>+</sup> cells in human melanoma tumors from 5 anti-PD-1 non-responders.

## Supplement Table 1

A)

| ImmGen population         | sample name                         | replicates |
|---------------------------|-------------------------------------|------------|
| DC.8+.SLN                 | Resident CD8a+ DC( rCD8a+)          | 3          |
| DC.4+.SLN                 | Resident CD11b+ DC<br>(rCD11b+)     | 3          |
| DC.Ilhilang-103-11blo.SLN | Migratory CD11b- CD103- DC<br>(mDN) | 3          |
| DC.Ilhilang+103+11blo.SLN | Migratory (CD103+ DC)<br>mCD103+    | 3          |
| DC.Ilhilang+103-11b+.SLN  | Langerhans Cell (mLC)               | 3          |
| DC.Ilhilang-103-11b+.SLN  | Migratory CD11b+ DC<br>(mCD11b+)    | 3          |
| Mo.6C+II-.BI              | Monocytes (Mono)                    | 5          |
| Mo.6C+II+.BI              |                                     |            |

B)

|   | Gene          | logFC  | AveExpr | adj.P.Val | population |
|---|---------------|--------|---------|-----------|------------|
|   | Clec9a        | 6.0453 | 5.8463  | 2.3E-07   | rCD8a+     |
| * | Xcr1          | 5.2157 | 6.4971  | 3.4E-14   | rCD8a+     |
| * | Gcsam         | 4.5376 | 5.8064  | 2.3E-11   | rCD8a+     |
|   | Cxcl9         | 4.4250 | 7.2124  | 2.3E-07   | rCD8a+     |
| * | Hepacam2      | 4.4128 | 5.5057  | 9.8E-11   | rCD8a+     |
| * | Tlr3          | 4.2569 | 5.7582  | 6.8E-14   | rCD8a+     |
| * | Snx22         | 3.1860 | 6.3865  | 7.8E-11   | rCD8a+     |
| * | Pdia5         | 3.1521 | 7.0875  | 1.8E-11   | rCD8a+     |
| * | Clnk          | 3.0847 | 5.8176  | 9.6E-13   | rCD8a+     |
|   | Fam149a       | 2.7531 | 6.3720  | 1.8E-10   | rCD8a+     |
| * | Clec1a        | 2.7458 | 5.2666  | 4.2E-11   | rCD8a+     |
| * | Cxcr3         | 2.7181 | 7.3807  | 9.4E-12   | rCD8a+     |
| * | 1700009J07Rik | 2.6434 | 5.8070  | 9.4E-12   | rCD8a+     |
|   | Itgae         | 2.4314 | 5.9630  | 1.3E-07   | rCD8a+     |
|   | Notch4        | 2.1416 | 6.8418  | 6.2E-10   | rCD8a+     |
|   | Dbn1          | 2.1235 | 6.8576  | 1.1E-08   | rCD8a+     |
|   | Naga          | 1.8590 | 9.9249  | 9.2E-08   | rCD8a+     |
|   | Ifnlr1        | 1.6591 | 6.2720  | 2.7E-07   | rCD8a+     |
|   | Eefsec        | 1.6021 | 7.9756  | 1.1E-08   | rCD8a+     |
|   | Arid3b        | 1.4773 | 6.9577  | 1.2E-07   | rCD8a+     |
| * | Mmp12         | 4.8078 | 6.0647  | 3.4E-13   | rCD11b+    |
| * | Mgl2          | 4.6375 | 5.7625  | 1.7E-08   | rCD11b+    |
| * | Cd4           | 3.6664 | 6.5537  | 6.1E-09   | rCD11b+    |
|   | Rgl1          | 2.8025 | 6.9580  | 9.6E-06   | rCD11b+    |
| * | Klrb1b        | 2.6520 | 5.6951  | 5.2E-07   | rCD11b+    |
|   | Egr2          | 2.6413 | 6.8819  | 6.3E-07   | rCD11b+    |
| * | Hr            | 2.2537 | 6.6558  | 9.2E-10   | rCD11b+    |
|   | Cd209d        | 2.0825 | 5.3407  | 1.4E-04   | rCD11b+    |
|   | Lphn3         | 1.8031 | 4.6999  | 8.3E-07   | rCD11b+    |
| * | Fcrls         | 1.5823 | 4.7863  | 5.0E-08   | rCD11b+    |

|   | <b>Gene</b>   | <b>logFC</b> | <b>AveExpr</b> | <b>adj.P.Val</b> | <b>population</b> |
|---|---------------|--------------|----------------|------------------|-------------------|
|   | Slc2a3        | 1.4923       | 6.7267         | 2.9E-04          | rCD11b+           |
|   | Ctnnd2        | 1.4801       | 6.6717         | 1.5E-05          | rCD11b+           |
| * | Clec4g        | 1.4722       | 5.5170         | 3.0E-06          | rCD11b+           |
|   | Cyp4f37       | 1.1100       | 4.9626         | 2.1E-04          | rCD11b+           |
| * | Ggt5          | 1.0227       | 6.4149         | 4.2E-06          | rCD11b+           |
|   | Dcstamp       | 0.9725       | 5.2880         | 1.4E-04          | rCD11b+           |
|   | Cox6b2        | 0.8364       | 6.3361         | 2.2E-04          | rCD11b+           |
|   | Stk25         | -0.8156      | 8.4029         | 3.9E-04          | rCD11b+           |
|   | Arid2         | -0.9218      | 8.8855         | 1.9E-04          | rCD11b+           |
|   | Ermard        | -1.0918      | 8.0013         | 4.6E-04          | rCD11b+           |
| * | Khdc1a        | 2.8835       | 3.9299         | 5.8E-07          | mDN               |
| * | Khdc1c        | 2.8771       | 5.9704         | 5.8E-07          | mDN               |
| * | Sned1         | 2.3779       | 7.3490         | 3.2E-04          | mDN               |
| * | Clmn          | 2.1187       | 5.4687         | 2.6E-04          | mDN               |
|   | Khdc1b        | 1.8016       | 5.5040         | 6.0E-06          | mDN               |
| * | Gdpd1         | 1.3379       | 5.1630         | 2.2E-04          | mDN               |
| * | Efna5         | 1.3041       | 6.1494         | 2.8E-04          | mDN               |
| * | Gm15698       | 3.5437       | 5.8649         | 9.7E-06          | mCD103+           |
| * | Vmn2r90       | 3.0364       | 5.1163         | 2.5E-05          | mCD103+           |
| * | Slc27a3       | 2.7056       | 6.7149         | 3.6E-05          | mCD103+           |
|   | Gltpd1        | 2.5726       | 7.4650         | 1.5E-04          | mCD103+           |
|   | Arg2          | 2.3732       | 6.1897         | 1.7E-04          | mCD103+           |
|   | Zdhhc14       | 2.1802       | 7.4723         | 3.2E-04          | mCD103+           |
| * | Arhgap8       | 1.9746       | 6.1339         | 2.4E-07          | mCD103+           |
|   | Cd96          | 1.5481       | 5.2300         | 1.4E-04          | mCD103+           |
| * | Exoc3l4       | 1.5155       | 7.0362         | 1.1E-05          | mCD103+           |
|   | Colq          | 1.3886       | 6.8375         | 3.2E-04          | mCD103+           |
| * | Mfsd4         | 1.3693       | 6.8100         | 2.5E-05          | mCD103+           |
|   | 2210409E12Rik | 1.3382       | 6.6145         | 1.4E-04          | mCD103+           |
|   | Erich5        | 1.3100       | 6.3656         | 1.1E-04          | mCD103+           |
| * | Slc18a1       | 1.2558       | 5.6380         | 8.9E-06          | mCD103+           |
|   | Sprr4         | 1.0699       | 5.9662         | 1.5E-04          | mCD103+           |
| * | Sh3gl1        | 0.9942       | 8.6567         | 4.0E-05          | mCD103+           |
|   | Adrm1         | 0.6508       | 8.8218         | 1.4E-04          | mCD103+           |
|   | Adrm1         | 0.6500       | 8.7883         | 1.9E-04          | mCD103+           |
| * | 1810011O10Rik | 5.7479       | 4.8945         | 9.5E-16          | mLC               |
| * | Fam189a2      | 4.4585       | 6.1501         | 4.6E-11          | mLC               |
|   | Fam115c       | 4.0949       | 5.7914         | 3.6E-12          | mLC               |
|   | Npy1r         | 4.0426       | 5.4201         | 2.2E-07          | mLC               |
|   | Atf7ip2       | 3.4395       | 5.1965         | 2.1E-06          | mLC               |
| * | Nbea          | 3.3415       | 5.3563         | 3.7E-12          | mLC               |
| * | Fam160a1      | 3.0305       | 6.3350         | 8.2E-11          | mLC               |
|   | Tjp1          | 2.6631       | 5.3330         | 3.6E-10          | mLC               |
| * | Pcdh7         | 2.3367       | 5.5365         | 2.0E-08          | mLC               |
|   | Pxdn          | 2.0861       | 5.8142         | 5.7E-08          | mLC               |
|   | 9330155M09Rik | 2.0174       | 3.4478         | 2.0E-08          | mLC               |
|   | Epb4.1l3      | 1.9747       | 5.6021         | 6.4E-07          | mLC               |
|   | Map2          | 1.9451       | 5.4537         | 1.2E-07          | mLC               |
|   | Fblim1        | 1.9175       | 6.1430         | 3.9E-07          | mLC               |
|   | Apbb2         | 1.8244       | 6.4300         | 5.7E-07          | mLC               |
| * | Stxbp5l       | 1.6258       | 4.3168         | 2.4E-11          | mLC               |
|   | Cadm2         | 1.5911       | 5.0181         | 3.9E-07          | mLC               |



|   | Gene         | logFC   | AveExpr | adj.P.Val | population |
|---|--------------|---------|---------|-----------|------------|
|   | Tmem45b      | 1.4376  | 5.5234  | 2.5E-06   | mLC        |
|   | Agmo         | 1.3380  | 4.1082  | 2.5E-06   | mLC        |
|   | Aldh1a2      | 4.7680  | 6.3960  | 1.3E-03   | mCD11b+    |
|   | Gm5486       | 3.8271  | 5.5478  | 9.5E-04   | mCD11b+    |
|   | Serpib9b     | 3.1731  | 6.4721  | 9.5E-04   | mCD11b+    |
|   | Cxcl13       | 3.0526  | 5.8987  | 3.0E-04   | mCD11b+    |
| * | Htra1        | 2.8685  | 5.7485  | 7.6E-05   | mCD11b+    |
|   | Rai14        | 2.2526  | 6.4865  | 4.6E-04   | mCD11b+    |
| * | Car2         | 2.1700  | 6.1995  | 8.0E-05   | mCD11b+    |
| * | Sod3         | 2.1562  | 5.5361  | 1.8E-05   | mCD11b+    |
| * | Grpr         | 2.0489  | 5.1700  | 9.6E-06   | mCD11b+    |
| * | AA467197     | 1.9255  | 5.6350  | 6.3E-05   | mCD11b+    |
|   | Mucl1        | 1.8875  | 3.7911  | 2.1E-05   | mCD11b+    |
|   | Depdc7       | 1.8215  | 6.1404  | 9.3E-04   | mCD11b+    |
|   | Gm5622       | 1.7573  | 4.6778  | 8.1E-04   | mCD11b+    |
|   | LOC102634703 | 1.7203  | 4.7592  | 4.3E-05   | mCD11b+    |
|   | LOC101055806 | 1.6901  | 3.4570  | 1.8E-05   | mCD11b+    |
|   | Gm10375      | 1.6646  | 3.9046  | 1.8E-05   | mCD11b+    |
|   | LOC102634703 | 1.5880  | 4.6571  | 9.4E-05   | mCD11b+    |
|   | Ms4a14       | 1.3324  | 3.9208  | 8.0E-04   | mCD11b+    |
|   | Fabp4        | 1.2515  | 4.7717  | 4.6E-04   | mCD11b+    |
|   | Gm10375      | 1.0393  | 3.8883  | 4.2E-04   | mCD11b+    |
| * | F13a1        | 7.0452  | 7.1382  | 1.4E-19   | Mono       |
|   | Klra2        | 6.5515  | 5.4958  | 1.9E-13   | Mono       |
|   | Chil3        | 6.0381  | 5.3666  | 1.6E-13   | Mono       |
| * | Serpib10     | 5.9713  | 5.1624  | 3.2E-16   | Mono       |
|   | Ms4a6d       | 5.5989  | 6.6334  | 2.6E-13   | Mono       |
|   | Msr1         | 5.4280  | 5.4302  | 1.9E-13   | Mono       |
| * | Cd93         | 5.0419  | 6.4879  | 1.4E-19   | Mono       |
| * | Fcgr1        | 4.8002  | 7.2360  | 2.2E-18   | Mono       |
| * | Fgd4         | 4.4340  | 5.8459  | 8.1E-14   | Mono       |
| * | Arhgef37     | 4.2467  | 5.7495  | 1.6E-14   | Mono       |
| * | Thbd         | 3.6346  | 6.7092  | 3.4E-14   | Mono       |
|   | Pde7b        | 3.3830  | 5.7471  | 8.3E-14   | Mono       |
| * | Rasgrp2      | 3.1460  | 6.7385  | 6.9E-15   | Mono       |
|   | Oas3         | 2.8684  | 7.1183  | 1.7E-13   | Mono       |
|   | C5ar1        | 2.8614  | 5.6460  | 1.8E-13   | Mono       |
|   | Hip1         | 2.6104  | 6.9733  | 2.3E-13   | Mono       |
|   | Siglec1      | 2.2416  | 6.8664  | 1.1E-13   | Mono       |
|   | Nedd4        | -4.2161 | 8.8719  | 1.8E-13   | Mono       |
|   | Adam23       | -6.4232 | 10.0104 | 7.1E-18   | Mono       |

**Supplemental Table 1 – related to Figure 1. ImmGen population specific gene signatures.**

(A) ImmGen sample ID, abbreviated sample name and replicates used in creation on ImmGen population specific gene signature. (B) DE was performed comparing one population to the aggregate of the 6 remaining populations. DE is ranked based on log fold change. An asterisk indicates gene was detected in scRNA-seq and thus used for gene signature overlay. See materials and methods for specific process through which DE signature was generated.

**Supplemental Table 2**

| gene          | avg_logFC | pct.1 | pct.2 | p_val     | p_val_adj | cluster |
|---------------|-----------|-------|-------|-----------|-----------|---------|
| Ccl17         | 1.5851    | 0.584 | 0.198 | 5.10E-148 | 7.40E-144 | 0       |
| Clu           | 1.2221    | 0.641 | 0.305 | 2.20E-119 | 3.30E-115 | 0       |
| Fxyd2         | 1.0765    | 0.548 | 0.221 | 2.60E-114 | 3.80E-110 | 0       |
| Cxcl1         | 0.9985    | 0.407 | 0.238 | 8.60E-37  | 1.30E-32  | 0       |
| Slc7a11       | 0.932     | 0.566 | 0.186 | 2.20E-136 | 3.20E-132 | 0       |
| Fabp5         | 0.8807    | 0.959 | 0.628 | 4.20E-205 | 6.10E-201 | 0       |
| S100a10       | 0.7559    | 0.587 | 0.297 | 2.20E-89  | 3.20E-85  | 0       |
| Ltc4s         | 0.7358    | 0.689 | 0.329 | 8.20E-117 | 1.20E-112 | 0       |
| Nrp2          | 0.723     | 0.534 | 0.183 | 2.00E-124 | 2.80E-120 | 0       |
| Cstb          | 0.7211    | 0.904 | 0.757 | 9.10E-122 | 1.30E-117 | 0       |
| Ccl5          | 1.3933    | 0.999 | 0.979 | 2.10E-226 | 3.10E-222 | 1       |
| Epsti1        | 1.3074    | 0.995 | 0.885 | 2.00E-269 | 2.90E-265 | 1       |
| Tnfrsf4       | 1.1602    | 0.797 | 0.335 | 5.10E-192 | 7.40E-188 | 1       |
| Txndc17       | 1.1027    | 0.947 | 0.745 | 1.40E-227 | 2.00E-223 | 1       |
| Zmynd15       | 1.045     | 0.947 | 0.537 | 1.20E-227 | 1.80E-223 | 1       |
| Serpib1a      | 0.9627    | 0.574 | 0.279 | 2.40E-74  | 3.50E-70  | 1       |
| Laptm4b       | 0.9457    | 0.614 | 0.105 | 5.00E-259 | 7.20E-255 | 1       |
| AW112010      | 0.9084    | 0.99  | 0.859 | 2.00E-173 | 3.00E-169 | 1       |
| Il12b         | 0.8985    | 0.386 | 0.118 | 2.80E-82  | 4.00E-78  | 1       |
| Mthfd2        | 0.8587    | 0.825 | 0.509 | 1.50E-148 | 2.20E-144 | 1       |
| H2-M2         | 1.4223    | 0.998 | 0.55  | 2.10E-204 | 3.00E-200 | 2       |
| Mfge8         | 1.2891    | 0.826 | 0.356 | 7.10E-132 | 1.00E-127 | 2       |
| Apol7c        | 0.9388    | 0.96  | 0.674 | 6.30E-98  | 9.10E-94  | 2       |
| 1810011O10Rik | 0.8978    | 0.317 | 0.007 | 7.90E-216 | 1.20E-211 | 2       |
| Rgs1          | 0.7823    | 0.966 | 0.875 | 2.00E-66  | 3.00E-62  | 2       |
| Malat1        | 0.7443    | 1     | 0.999 | 6.60E-155 | 9.60E-151 | 2       |
| Tsc22d3       | 0.695     | 0.593 | 0.343 | 2.00E-45  | 2.90E-41  | 2       |
| Fscn1         | 0.6631    | 0.996 | 0.855 | 4.60E-75  | 6.70E-71  | 2       |
| Ccl22         | 0.6486    | 0.87  | 0.607 | 1.70E-51  | 2.50E-47  | 2       |
| Ankrd33b      | 0.6299    | 0.847 | 0.564 | 7.50E-57  | 1.10E-52  | 2       |
| Lyz1          | 2.0233    | 0.312 | 0.114 | 4.30E-31  | 6.20E-27  | 3       |
| Mmp12         | 1.8648    | 0.374 | 0.011 | 1.50E-238 | 2.20E-234 | 3       |
| H2-DMb2       | 1.5699    | 0.89  | 0.234 | 2.60E-224 | 3.90E-220 | 3       |
| Il1b          | 1.538     | 0.851 | 0.282 | 1.30E-156 | 1.90E-152 | 3       |
| H2-Ab1        | 1.522     | 1     | 0.863 | 1.20E-170 | 1.70E-166 | 3       |
| Gm2a          | 1.5003    | 0.94  | 0.289 | 2.60E-219 | 3.80E-215 | 3       |
| Cd209a        | 1.4702    | 0.333 | 0.022 | 1.50E-158 | 2.20E-154 | 3       |
| H2-DMa        | 1.3199    | 0.976 | 0.434 | 1.90E-177 | 2.80E-173 | 3       |
| H2-Eb1        | 1.2644    | 1     | 0.889 | 7.10E-159 | 1.00E-154 | 3       |
| Cd74          | 1.2485    | 1     | 0.995 | 1.40E-174 | 2.00E-170 | 3       |
| Cd1d1         | 1.2515    | 0.608 | 0.133 | 1.20E-142 | 1.80E-138 | 4       |
| Glipr2        | 1.1335    | 0.873 | 0.438 | 1.50E-116 | 2.20E-112 | 4       |
| Rnaset2a      | 1.102     | 0.654 | 0.346 | 1.30E-62  | 1.90E-58  | 4       |
| Phf11b        | 0.9192    | 0.804 | 0.417 | 2.90E-91  | 4.20E-87  | 4       |
| Gnl2          | 0.8176    | 0.728 | 0.408 | 2.80E-59  | 4.00E-55  | 4       |
| Tubb5         | 0.8088    | 0.99  | 0.862 | 1.10E-98  | 1.50E-94  | 4       |
| Socs2         | 0.7804    | 0.972 | 0.668 | 3.60E-87  | 5.30E-83  | 4       |
| Isg15         | 0.7668    | 0.565 | 0.261 | 9.60E-46  | 1.40E-41  | 4       |
| Cnn2          | 0.7533    | 0.919 | 0.692 | 1.30E-74  | 1.80E-70  | 4       |
| Fabp5         | 0.7444    | 0.954 | 0.693 | 1.30E-65  | 1.90E-61  | 4       |

| gene     | avg_logFC | pct.1 | pct.2 | p_val     | p_val_adj | cluster |
|----------|-----------|-------|-------|-----------|-----------|---------|
| ApoE     | 3.2821    | 0.599 | 0.174 | 8.40E-121 | 1.20E-116 | 5       |
| Lyz2     | 3.0937    | 0.987 | 0.488 | 4.20E-228 | 6.20E-224 | 5       |
| C1qb     | 2.7224    | 0.398 | 0.043 | 4.00E-151 | 5.90E-147 | 5       |
| Plac8    | 2.6962    | 0.804 | 0.168 | 4.90E-222 | 7.20E-218 | 5       |
| C1qa     | 2.6874    | 0.357 | 0.044 | 1.80E-122 | 2.60E-118 | 5       |
| Ly6i     | 2.5799    | 0.829 | 0.041 | 0.00E+00  | 0.00E+00  | 5       |
| Ifi2712a | 2.3491    | 0.895 | 0.234 | 4.90E-241 | 7.10E-237 | 5       |
| Ifitm3   | 2.274     | 0.934 | 0.257 | 2.50E-238 | 3.70E-234 | 5       |
| C1qc     | 2.2405    | 0.36  | 0.025 | 4.00E-170 | 5.90E-166 | 5       |
| Ms4a6c   | 2.0391    | 0.98  | 0.163 | 0.00E+00  | 0.00E+00  | 5       |
| Cd209d   | 1.6266    | 0.276 | 0.022 | 1.50E-83  | 2.20E-79  | 6       |
| H2-DMb2  | 1.5878    | 0.88  | 0.273 | 5.70E-100 | 8.30E-96  | 6       |
| Cd7      | 1.4582    | 0.411 | 0.036 | 3.40E-116 | 5.00E-112 | 6       |
| Klrd1    | 1.3021    | 0.448 | 0.093 | 1.10E-59  | 1.60E-55  | 6       |
| Lgals1   | 1.1425    | 0.724 | 0.534 | 6.20E-18  | 9.00E-14  | 6       |
| Cd8a     | 1.0849    | 0.453 | 0.081 | 5.80E-65  | 8.40E-61  | 6       |
| Atp1b1   | 1.0457    | 0.333 | 0.014 | 2.40E-150 | 3.50E-146 | 6       |
| Gpr183   | 1.0352    | 0.771 | 0.22  | 1.20E-78  | 1.80E-74  | 6       |
| Lag3     | 1.0148    | 0.458 | 0.071 | 8.50E-79  | 1.20E-74  | 6       |
| H2-DMA   | 1.0089    | 0.932 | 0.468 | 7.80E-58  | 1.10E-53  | 6       |
| Ppt1     | 2.4819    | 0.989 | 0.219 | 1.20E-183 | 1.80E-179 | 7       |
| Naaa     | 2.2571    | 0.949 | 0.105 | 1.20E-260 | 1.70E-256 | 7       |
| Xcr1     | 1.7113    | 0.876 | 0.01  | 0.00E+00  | 0.00E+00  | 7       |
| Plbd1    | 1.6669    | 0.989 | 0.245 | 8.30E-148 | 1.20E-143 | 7       |
| Cd8a     | 1.6579    | 0.921 | 0.061 | 0.00E+00  | 0.00E+00  | 7       |
| Ifi205   | 1.5409    | 0.899 | 0.044 | 0.00E+00  | 0.00E+00  | 7       |
| Ckb      | 1.4272    | 0.865 | 0.109 | 3.20E-191 | 4.60E-187 | 7       |
| Cst3     | 1.4052    | 1     | 0.993 | 4.10E-87  | 6.00E-83  | 7       |
| Psap     | 1.3847    | 0.994 | 0.888 | 3.10E-86  | 4.50E-82  | 7       |
| Cxcl9    | 1.3386    | 0.747 | 0.074 | 1.10E-183 | 1.60E-179 | 7       |

**Supplemental Table 2 – related to Figure 1. Top 10 DE genes between all myeloid clusters in mouse tdLN scRNA-Seq**

DE was performed where every cluster was compared to all remaining cells. The top 10 DE genes for each cluster was selected and displayed in the Figure 1C and Supplementary Table 2. DE parameters: logfc.threshold = 0.4, min.pct = 0.25.

### Supplemental Table 3

| gene     | avg_logFC | pct.1 | pct.2 | p_val    | p_val_adj | up in cluster |
|----------|-----------|-------|-------|----------|-----------|---------------|
| Ccl5     | 2.4898    | 0.996 | 0.951 | 1.2E-237 | 1.8E-233  | mig           |
| Epsti1   | 2.1779    | 0.97  | 0.686 | 2.7E-238 | 3.9E-234  | mig           |
| Fscn1    | 2.1234    | 0.985 | 0.556 | 1.2E-259 | 1.8E-255  | mig           |
| Ccl22    | 1.9804    | 0.764 | 0.271 | 1.1E-137 | 1.6E-133  | mig           |
| Tmem123  | 1.9144    | 0.995 | 0.681 | 6.1E-279 | 8.9E-275  | mig           |
| AW112010 | 1.8506    | 0.947 | 0.647 | 1.1E-211 | 1.6E-207  | mig           |
| Apol7c   | 1.7747    | 0.831 | 0.351 | 4.6E-146 | 6.8E-142  | mig           |
| Zmynd15  | 1.6995    | 0.766 | 0.21  | 1.4E-150 | 2.1E-146  | mig           |
| Socs2    | 1.5899    | 0.866 | 0.198 | 3.5E-205 | 5.1E-201  | mig           |
| Clu      | 1.5691    | 0.475 | 0.161 | 2.0E-55  | 2.9E-51   | mig           |
| Serpib6b | 1.5590    | 0.822 | 0.343 | 1.1E-146 | 1.6E-142  | mig           |
| Cacnb3   | 1.5470    | 0.88  | 0.218 | 5.6E-212 | 8.1E-208  | mig           |
| Samsn1   | 1.5230    | 0.961 | 0.4   | 2.8E-242 | 4.0E-238  | mig           |
| Anxa3    | 1.5110    | 0.957 | 0.366 | 1.1E-228 | 1.6E-224  | mig           |
| Nudt17   | 1.5007    | 0.859 | 0.239 | 1.8E-198 | 2.6E-194  | mig           |
| Cxcl1    | 1.4360    | 0.344 | 0.106 | 2.7E-35  | 3.9E-31   | mig           |
| Ccr7     | 1.4348    | 0.975 | 0.576 | 3.5E-196 | 5.0E-192  | mig           |
| Ccl17    | 1.4054    | 0.381 | 0.074 | 2.9E-50  | 4.2E-46   | mig           |
| Gadd45b  | 1.3783    | 0.922 | 0.533 | 8.3E-184 | 1.2E-179  | mig           |
| Crip1    | 1.3775    | 0.997 | 0.923 | 4.7E-211 | 6.8E-207  | mig           |
| Lgals3   | -1.3272   | 0.455 | 0.849 | 1.7E-136 | 2.4E-132  | res           |
| Wfdc17   | -1.3345   | 0.074 | 0.472 | 1.6E-155 | 2.3E-151  | res           |
| Ms4a6c   | -1.3710   | 0.06  | 0.703 | 0.0E+00  | 0.0E+00   | res           |
| H2-Aa    | -1.4673   | 0.925 | 1     | 6.2E-251 | 9.1E-247  | res           |
| Psap     | -1.5084   | 0.866 | 0.965 | 1.2E-174 | 1.8E-170  | res           |
| Alox5ap  | -1.5244   | 0.074 | 0.842 | 0.0E+00  | 0.0E+00   | res           |
| Naaa     | -1.5248   | 0.034 | 0.518 | 2.1E-266 | 3.0E-262  | res           |
| Cd74     | -1.5565   | 0.995 | 1     | 1.4E-271 | 2.0E-267  | res           |
| Mmp12    | -1.5784   | 0.01  | 0.267 | 1.2E-151 | 1.7E-147  | res           |
| H2-DMb1  | -1.5802   | 0.247 | 0.911 | 1.4E-299 | 2.1E-295  | res           |
| H2-Eb1   | -1.6460   | 0.878 | 1     | 2.0E-264 | 3.0E-260  | res           |
| Ppt1     | -1.6539   | 0.146 | 0.595 | 4.9E-152 | 7.1E-148  | res           |
| Ifitm3   | -1.7392   | 0.172 | 0.697 | 5.9E-192 | 8.6E-188  | res           |
| H2-DMa   | -1.7663   | 0.342 | 0.976 | 0.0E+00  | 0.0E+00   | res           |
| Plbd1    | -1.8892   | 0.087 | 0.906 | 0.0E+00  | 0.0E+00   | res           |
| Ii1b     | -1.8961   | 0.195 | 0.77  | 1.1E-218 | 1.6E-214  | res           |
| Gm2a     | -1.9321   | 0.171 | 0.951 | 0.0E+00  | 0.0E+00   | res           |
| H2-Ab1   | -2.2566   | 0.841 | 1     | 5.8E-295 | 8.5E-291  | res           |
| Lyz1     | -2.4575   | 0.059 | 0.274 | 3.1E-62  | 4.5E-58   | res           |
| Lyz2     | -3.2636   | 0.419 | 0.844 | 1.6E-157 | 2.3E-153  | res           |

### Supplemental Table 3 – related to Supplementary Figure 1. Top 20 DE genes between migratory and resident myeloid populations.

DE was performed where migratory clusters (0, 1, 2, 4, 6) were compared to resident clusters (3, 5, 7). The top 20 DE genes for each group was selected and displayed in Supplementary Figure 1E and Supplementary Table 3. DE parameters: logfc.threshold = 0.4, min.pct = 0.25.

**Supplemental Table 4**

| gene     | avg_logFC | pct.1 | pct.2 | p_val    | p_val_adj | up in cluster |
|----------|-----------|-------|-------|----------|-----------|---------------|
| Clu      | 1.7317    | 0.641 | 0.229 | 1.1E-53  | 1.6E-49   | 0             |
| Ccl17    | 1.6774    | 0.584 | 0.198 | 8.7E-42  | 1.3E-37   | 0             |
| Cxcl1    | 1.3876    | 0.407 | 0.163 | 1.8E-21  | 2.7E-17   | 0             |
| Fxyd2    | 1.1307    | 0.548 | 0.265 | 3.4E-30  | 4.9E-26   | 0             |
| mt-Nd1   | 1.0185    | 0.957 | 0.626 | 4.8E-80  | 7.0E-76   | 0             |
| mt-Cytb  | 0.9925    | 0.968 | 0.73  | 1.8E-82  | 2.6E-78   | 0             |
| mt-Co3   | 0.9129    | 0.995 | 0.913 | 1.5E-90  | 2.2E-86   | 0             |
| H2-M2    | 0.8723    | 0.663 | 0.44  | 5.1E-23  | 7.4E-19   | 0             |
| Rpl36a   | 0.8535    | 0.974 | 0.758 | 2.6E-88  | 3.8E-84   | 0             |
| mt-Nd2   | 0.8523    | 0.798 | 0.392 | 5.3E-56  | 7.7E-52   | 0             |
| mt-Nd4   | 0.8232    | 0.923 | 0.598 | 9.7E-62  | 1.4E-57   | 0             |
| Slc7a11  | 0.8232    | 0.566 | 0.232 | 5.8E-30  | 8.5E-26   | 0             |
| S100a10  | 0.8161    | 0.587 | 0.242 | 1.4E-33  | 2.0E-29   | 0             |
| mt-Atp6  | 0.7962    | 1     | 0.957 | 3.5E-78  | 5.0E-74   | 0             |
| mt-Co2   | 0.7784    | 0.996 | 0.885 | 4.7E-77  | 6.8E-73   | 0             |
| Ccl22    | 0.7737    | 0.8   | 0.578 | 5.0E-24  | 7.2E-20   | 0             |
| Rps17    | 0.7590    | 0.952 | 0.725 | 5.9E-71  | 8.6E-67   | 0             |
| Mt1      | 0.7568    | 0.657 | 0.379 | 1.4E-25  | 2.0E-21   | 0             |
| Vim      | 0.7401    | 0.952 | 0.84  | 9.3E-40  | 1.4E-35   | 0             |
| Cxcl2    | 0.7337    | 0.3   | 0.132 | 9.3E-12  | 1.4E-07   | 0             |
| Adam23   | 0.7209    | 0.603 | 0.198 | 5.5E-42  | 8.0E-38   | 0             |
| Rps8     | 0.7128    | 0.989 | 0.916 | 6.5E-81  | 9.5E-77   | 0             |
| Ltc4s    | 0.7021    | 0.689 | 0.318 | 4.0E-38  | 5.9E-34   | 0             |
| Rps3a1   | 0.6963    | 0.998 | 0.959 | 1.9E-102 | 2.8E-98   | 0             |
| Cstb     | 0.6916    | 0.904 | 0.784 | 1.2E-40  | 1.8E-36   | 0             |
| Cd9      | 0.6756    | 0.656 | 0.305 | 1.1E-34  | 1.6E-30   | 0             |
| Serp1b1a | 0.6680    | 0.463 | 0.244 | 1.7E-15  | 2.4E-11   | 0             |
| Rps18    | 0.6561    | 1     | 0.985 | 3.0E-105 | 4.4E-101  | 0             |
| Rps29    | 0.6548    | 0.999 | 0.969 | 1.6E-98  | 2.3E-94   | 0             |
| Rpl6     | 0.6464    | 0.992 | 0.929 | 4.6E-91  | 6.8E-87   | 0             |
| Mif4gd   | -0.6031   | 0.316 | 0.603 | 4.7E-33  | 6.9E-29   | 4             |
| Eno3     | -0.6091   | 0.753 | 0.903 | 7.6E-34  | 1.1E-29   | 4             |
| Tagln2   | -0.6210   | 0.765 | 0.908 | 3.5E-30  | 5.2E-26   | 4             |
| Tuba1a   | -0.6211   | 0.868 | 0.957 | 9.5E-44  | 1.4E-39   | 4             |
| Dok1     | -0.6307   | 0.57  | 0.835 | 4.8E-44  | 6.9E-40   | 4             |
| Fscn1    | -0.6310   | 0.985 | 0.995 | 1.0E-55  | 1.5E-51   | 4             |
| Tap2     | -0.6369   | 0.439 | 0.707 | 2.7E-36  | 3.9E-32   | 4             |
| Ccnd1    | -0.6383   | 0.205 | 0.42  | 3.5E-21  | 5.1E-17   | 4             |
| Tubb5    | -0.6641   | 0.907 | 0.99  | 3.6E-63  | 5.2E-59   | 4             |
| Ccnd2    | -0.6779   | 0.065 | 0.321 | 8.3E-40  | 1.2E-35   | 4             |
| Phf11a   | -0.6810   | 0.162 | 0.483 | 2.0E-42  | 2.9E-38   | 4             |
| Vwa5a    | -0.6886   | 0.255 | 0.511 | 5.6E-31  | 8.2E-27   | 4             |
| Rcsd1    | -0.6916   | 0.574 | 0.858 | 1.0E-50  | 1.5E-46   | 4             |
| Ube2l6   | -0.6939   | 0.697 | 0.858 | 6.1E-41  | 8.8E-37   | 4             |
| Cnn2     | -0.7014   | 0.718 | 0.919 | 1.3E-54  | 1.8E-50   | 4             |
| Bcl2l14  | -0.7050   | 0.127 | 0.417 | 1.3E-39  | 1.9E-35   | 4             |
| Psmb9    | -0.7079   | 0.876 | 0.98  | 2.1E-80  | 3.1E-76   | 4             |
| Epsti1   | -0.7142   | 0.971 | 0.99  | 3.7E-63  | 5.4E-59   | 4             |
| Rnaset2b | -0.7610   | 0.121 | 0.427 | 2.1E-44  | 3.1E-40   | 4             |
| Sp140    | -0.7645   | 0.339 | 0.646 | 5.7E-44  | 8.2E-40   | 4             |

| gene     | avg_logFC | pct.1 | pct.2 | p_val   | p_val_adj | up in cluster |
|----------|-----------|-------|-------|---------|-----------|---------------|
| Tap1     | -0.8232   | 0.425 | 0.786 | 2.1E-63 | 3.0E-59   | 4             |
| Ifitm3   | -0.8706   | 0.15  | 0.514 | 1.4E-55 | 2.0E-51   | 4             |
| Phf11b   | -0.9062   | 0.41  | 0.804 | 1.3E-69 | 1.9E-65   | 4             |
| Inpp5b   | -0.9081   | 0.134 | 0.557 | 2.0E-74 | 3.0E-70   | 4             |
| Isg15    | -0.9561   | 0.216 | 0.565 | 2.1E-45 | 3.0E-41   | 4             |
| Irf8     | -0.9921   | 0.59  | 0.837 | 1.4E-50 | 2.0E-46   | 4             |
| Cd1d1    | -1.0065   | 0.213 | 0.608 | 1.2E-58 | 1.7E-54   | 4             |
| Tnfrsf4  | -1.0591   | 0.382 | 0.789 | 4.4E-68 | 6.4E-64   | 4             |
| Glipr2   | -1.1852   | 0.491 | 0.873 | 8.3E-90 | 1.2E-85   | 4             |
| Rnaset2a | -1.2969   | 0.25  | 0.654 | 1.4E-69 | 2.1E-65   | 4             |

**Supplemental Table 4 – related to Figure 1. Top 30 DE genes between mCD11b<sup>+</sup> cDC2 cluster 0 and 4**

DE was performed where CD11b<sup>+</sup> cDC2 cluster 0 was compared CD11b<sup>+</sup> cDC2 cluster 4. The top 30 DE genes for each group was selected and displayed in Figure 1D and Supplementary Table 4. DE parameters: logfc.threshold = 0.4, min.pct = 0.25.

## Supplemental Table 5

(A)

| gene     | avg_logFC | pct.1 | pct.2 | p_val     | p_val_adj | cluster      |
|----------|-----------|-------|-------|-----------|-----------|--------------|
| Ccl5     | 1.1778    | 0.999 | 0.996 | 2.55E-197 | 3.67E-193 | mCD301b+ DTR |
| Clu      | 1.0672    | 0.509 | 0.286 | 4.74E-60  | 6.82E-56  | mCD301b+ DTR |
| Fos      | 1.0095    | 0.759 | 0.498 | 8.32E-98  | 1.20E-93  | mCD301b+ DTR |
| Sox4     | 0.7823    | 0.573 | 0.262 | 2.37E-79  | 3.40E-75  | mCD301b+ DTR |
| Slc7a11  | 0.7527    | 0.562 | 0.353 | 1.84E-57  | 2.65E-53  | mCD301b+ DTR |
| Dap      | 0.6841    | 0.74  | 0.573 | 1.23E-64  | 1.78E-60  | mCD301b+ DTR |
| Btg2     | 0.6286    | 0.674 | 0.489 | 8.06E-61  | 1.16E-56  | mCD301b+ DTR |
| Mt1      | 0.6236    | 0.681 | 0.477 | 6.46E-41  | 9.28E-37  | mCD301b+ DTR |
| Zfos1    | 0.6148    | 0.836 | 0.69  | 2.17E-81  | 3.12E-77  | mCD301b+ DTR |
| Ptma     | 0.5964    | 0.997 | 0.984 | 6.35E-127 | 9.13E-123 | mCD301b+ DTR |
| Eif4a2   | 0.5777    | 0.87  | 0.746 | 2.15E-78  | 3.09E-74  | mCD301b+ DTR |
| Npc2     | 0.5707    | 0.996 | 0.989 | 7.31E-86  | 1.05E-81  | mCD301b+ DTR |
| Malat1   | 0.5414    | 1     | 0.998 | 1.13E-136 | 1.63E-132 | mCD301b+ DTR |
| Gm42418  | 0.5265    | 0.666 | 0.693 | 4.30E-17  | 6.19E-13  | mCD301b+ DTR |
| Pmaip1   | 0.5094    | 0.767 | 0.585 | 3.64E-46  | 5.24E-42  | mCD301b+ DTR |
| Rps27    | 0.4762    | 1     | 0.999 | 1.54E-132 | 2.22E-128 | mCD301b+ DTR |
| AW112010 | 0.4711    | 0.991 | 0.968 | 1.02E-71  | 1.46E-67  | mCD301b+ DTR |
| Junb     | 0.4692    | 0.954 | 0.917 | 1.04E-44  | 1.50E-40  | mCD301b+ DTR |
| Pnrc1    | 0.4622    | 0.862 | 0.791 | 1.17E-65  | 1.69E-61  | mCD301b+ DTR |
| Fosb     | 0.4576    | 0.32  | 0.164 | 6.68E-40  | 9.60E-36  | mCD301b+ DTR |
| Npm1     | 0.4564    | 0.971 | 0.934 | 2.72E-78  | 3.91E-74  | mCD301b+ DTR |
| Ltc4s    | 0.4449    | 0.627 | 0.516 | 4.63E-33  | 6.65E-29  | mCD301b+ DTR |
| Zfp36    | 0.4449    | 0.876 | 0.811 | 9.88E-47  | 1.42E-42  | mCD301b+ DTR |
| Jun      | 0.4405    | 0.797 | 0.763 | 1.00E-28  | 1.44E-24  | mCD301b+ DTR |
| Id2      | 0.4290    | 0.989 | 0.976 | 3.85E-60  | 5.53E-56  | mCD301b+ DTR |
| Atf3     | 0.4216    | 0.391 | 0.298 | 2.53E-30  | 3.64E-26  | mCD301b+ DTR |
| Eif3e    | 0.4132    | 0.921 | 0.884 | 4.08E-63  | 5.86E-59  | mCD301b+ DTR |
| Rps9     | 0.4120    | 0.999 | 1     | 2.05E-126 | 2.95E-122 | mCD301b+ DTR |
| Rel      | 0.4112    | 0.83  | 0.769 | 3.68E-44  | 5.30E-40  | mCD301b+ DTR |
| Zfp36l1  | 0.4028    | 0.968 | 0.936 | 6.98E-53  | 1.00E-48  | mCD301b+ DTR |
| Ccl17    | -1.5065   | 0.877 | 0.652 | 1.41E-99  | 2.03E-95  | mCD301b- DTR |
| H2-Ab1   | -1.4184   | 0.961 | 0.843 | 4.19E-151 | 6.03E-147 | mCD301b- DTR |
| H2-Eb1   | -1.1105   | 0.955 | 0.792 | 3.02E-110 | 4.34E-106 | mCD301b- DTR |
| Tagln2   | -1.1070   | 0.99  | 0.736 | 2.51E-236 | 3.62E-232 | mCD301b- DTR |
| Ccnd2    | -1.0573   | 0.539 | 0.121 | 2.07E-112 | 2.98E-108 | mCD301b- DTR |
| Cd74     | -1.0364   | 0.999 | 0.996 | 3.29E-143 | 4.73E-139 | mCD301b- DTR |
| H2-Aa    | -1.0312   | 0.981 | 0.894 | 3.12E-114 | 4.49E-110 | mCD301b- DTR |
| Isg15    | -1.0082   | 0.569 | 0.232 | 1.23E-84  | 1.76E-80  | mCD301b- DTR |
| AA467197 | -0.9998   | 0.751 | 0.306 | 3.18E-125 | 4.58E-121 | mCD301b- DTR |
| Fabp5    | -0.9955   | 0.982 | 0.942 | 1.86E-126 | 2.68E-122 | mCD301b- DTR |
| Anxa2    | -0.9913   | 0.979 | 0.814 | 5.63E-191 | 8.09E-187 | mCD301b- DTR |
| Cd40     | -0.9805   | 0.771 | 0.34  | 3.95E-125 | 5.68E-121 | mCD301b- DTR |
| Ccl22    | -0.9736   | 0.979 | 0.894 | 1.23E-93  | 1.76E-89  | mCD301b- DTR |
| Lgals1   | -0.9487   | 0.882 | 0.592 | 4.07E-130 | 5.86E-126 | mCD301b- DTR |
| Cst3     | -0.9086   | 1     | 0.999 | 1.24E-209 | 1.78E-205 | mCD301b- DTR |
| H2-DMb2  | -0.8043   | 0.482 | 0.144 | 7.32E-70  | 1.05E-65  | mCD301b- DTR |
| Cd1d1    | -0.7898   | 0.564 | 0.186 | 1.90E-91  | 2.74E-87  | mCD301b- DTR |
| Myl12a   | -0.7746   | 0.974 | 0.826 | 8.15E-150 | 1.17E-145 | mCD301b- DTR |

| gene     | avg_logFC | pct.1 | pct.2 | p_val     | p_val_adj | cluster      |
|----------|-----------|-------|-------|-----------|-----------|--------------|
| Coro1a   | -0.7700   | 0.856 | 0.56  | 2.90E-118 | 4.17E-114 | mCD301b- DTR |
| H2-DMA   | -0.7544   | 0.668 | 0.299 | 3.34E-87  | 4.81E-83  | mCD301b- DTR |
| Cd86     | -0.6969   | 0.817 | 0.508 | 5.97E-77  | 8.58E-73  | mCD301b- DTR |
| Actb     | -0.6829   | 1     | 0.999 | 4.96E-165 | 7.13E-161 | mCD301b- DTR |
| Tnfrsf4  | -0.6797   | 0.586 | 0.294 | 2.69E-59  | 3.86E-55  | mCD301b- DTR |
| Glipr2   | -0.6774   | 0.953 | 0.758 | 5.15E-91  | 7.41E-87  | mCD301b- DTR |
| Bcl2a1d  | -0.6749   | 0.975 | 0.847 | 1.95E-128 | 2.81E-124 | mCD301b- DTR |
| Pfn1     | -0.6694   | 1     | 0.994 | 1.04E-196 | 1.49E-192 | mCD301b- DTR |
| Cnn2     | -0.6652   | 0.968 | 0.762 | 6.43E-121 | 9.25E-117 | mCD301b- DTR |
| S100a10  | -0.6535   | 0.728 | 0.557 | 3.74E-50  | 5.38E-46  | mCD301b- DTR |
| Irf8     | -0.6488   | 0.876 | 0.722 | 1.85E-52  | 2.66E-48  | mCD301b- DTR |
| Cd1d2    | -0.6319   | 0.384 | 0.082 | 1.70E-68  | 2.45E-64  | mCD301b- DTR |
| Bcl2a1b  | -0.6266   | 0.993 | 0.956 | 5.15E-128 | 7.40E-124 | mCD301b- DTR |
| Cfl1     | -0.6159   | 0.994 | 0.934 | 2.16E-136 | 3.11E-132 | mCD301b- DTR |
| Cd82     | -0.6052   | 0.516 | 0.223 | 2.34E-53  | 3.37E-49  | mCD301b- DTR |
| Bcl2a1a  | -0.5989   | 0.893 | 0.718 | 5.60E-64  | 8.05E-60  | mCD301b- DTR |
| Tnfsf9   | -0.5973   | 0.342 | 0.069 | 7.65E-59  | 1.10E-54  | mCD301b- DTR |
| Ctsz     | -0.5914   | 0.987 | 0.927 | 3.40E-116 | 4.89E-112 | mCD301b- DTR |
| Il4i1    | -0.5856   | 0.949 | 0.791 | 1.41E-76  | 2.03E-72  | mCD301b- DTR |
| Napsa    | -0.5805   | 0.601 | 0.296 | 3.54E-67  | 5.09E-63  | mCD301b- DTR |
| Myl6     | -0.5784   | 1     | 0.982 | 1.92E-130 | 2.77E-126 | mCD301b- DTR |
| Vwa5a    | -0.5750   | 0.657 | 0.341 | 6.07E-64  | 8.73E-60  | mCD301b- DTR |
| Cd70     | -0.5683   | 0.265 | 0.035 | 3.93E-60  | 5.65E-56  | mCD301b- DTR |
| S100a11  | -0.5608   | 0.984 | 0.943 | 2.10E-81  | 3.02E-77  | mCD301b- DTR |
| Txn1     | -0.5604   | 0.986 | 0.904 | 1.46E-78  | 2.11E-74  | mCD301b- DTR |
| Ifi30    | -0.5571   | 0.966 | 0.86  | 2.53E-82  | 3.64E-78  | mCD301b- DTR |
| Gapdh    | -0.5555   | 0.966 | 0.829 | 7.99E-86  | 1.15E-81  | mCD301b- DTR |
| Srgn     | -0.5510   | 0.999 | 0.984 | 1.84E-131 | 2.64E-127 | mCD301b- DTR |
| Cd81     | -0.5477   | 0.45  | 0.269 | 7.53E-30  | 1.08E-25  | mCD301b- DTR |
| Arpc2    | -0.5379   | 0.99  | 0.929 | 4.15E-116 | 5.96E-112 | mCD301b- DTR |
| Gpr183   | -0.5299   | 0.392 | 0.118 | 1.20E-48  | 1.72E-44  | mCD301b- DTR |
| Calm1    | -0.5297   | 1     | 0.998 | 6.22E-160 | 8.95E-156 | mCD301b- DTR |
| Arpc5    | -0.5296   | 0.966 | 0.849 | 5.11E-92  | 7.35E-88  | mCD301b- DTR |
| Gngt2    | -0.5279   | 0.79  | 0.508 | 1.54E-52  | 2.22E-48  | mCD301b- DTR |
| Lrrc58   | -0.5189   | 0.924 | 0.718 | 1.04E-78  | 1.50E-74  | mCD301b- DTR |
| Tap1     | -0.5144   | 0.792 | 0.484 | 7.04E-70  | 1.01E-65  | mCD301b- DTR |
| Apol7c   | -0.5121   | 0.702 | 0.573 | 1.64E-16  | 2.36E-12  | mCD301b- DTR |
| Glrx     | -0.5079   | 0.5   | 0.214 | 5.22E-46  | 7.51E-42  | mCD301b- DTR |
| Wnk1     | -0.5076   | 0.958 | 0.801 | 3.32E-71  | 4.78E-67  | mCD301b- DTR |
| Emp3     | -0.5068   | 0.714 | 0.421 | 3.63E-62  | 5.22E-58  | mCD301b- DTR |
| Arpc1b   | -0.5006   | 0.983 | 0.941 | 6.55E-101 | 9.42E-97  | mCD301b- DTR |
| Ccnd1    | -0.4998   | 0.325 | 0.053 | 5.51E-62  | 7.93E-58  | mCD301b- DTR |
| Necap2   | -0.4976   | 0.812 | 0.502 | 8.42E-70  | 1.21E-65  | mCD301b- DTR |
| S100a6   | -0.4969   | 0.969 | 0.912 | 4.71E-55  | 6.77E-51  | mCD301b- DTR |
| Arpc4    | -0.4968   | 0.867 | 0.613 | 3.91E-70  | 5.63E-66  | mCD301b- DTR |
| Cd302    | -0.4958   | 0.483 | 0.184 | 9.18E-54  | 1.32E-49  | mCD301b- DTR |
| Clic4    | -0.4861   | 0.93  | 0.743 | 3.13E-66  | 4.50E-62  | mCD301b- DTR |
| Cotl1    | -0.4833   | 0.576 | 0.3   | 1.02E-56  | 1.47E-52  | mCD301b- DTR |
| Calm3    | -0.4775   | 0.891 | 0.676 | 4.98E-69  | 7.16E-65  | mCD301b- DTR |
| Tspo     | -0.4734   | 0.983 | 0.949 | 4.00E-69  | 5.76E-65  | mCD301b- DTR |
| Ggh      | -0.4689   | 0.532 | 0.216 | 2.06E-63  | 2.96E-59  | mCD301b- DTR |
| Rnaset2a | -0.4664   | 0.606 | 0.349 | 8.60E-37  | 1.24E-32  | mCD301b- DTR |



| gene     | avg_logFC | pct.1 | pct.2 | p_val     | p_val_adj | cluster      |
|----------|-----------|-------|-------|-----------|-----------|--------------|
| Lgals3   | -0.4585   | 0.689 | 0.447 | 6.62E-38  | 9.53E-34  | mCD301b- DTR |
| Ifi2712a | -0.4529   | 0.536 | 0.296 | 1.17E-36  | 1.68E-32  | mCD301b- DTR |
| Fscn1    | -0.4527   | 0.995 | 0.989 | 2.28E-74  | 3.28E-70  | mCD301b- DTR |
| Cd63     | -0.4471   | 0.99  | 0.939 | 2.27E-58  | 3.26E-54  | mCD301b- DTR |
| Gpx1     | -0.4466   | 0.872 | 0.662 | 1.20E-48  | 1.72E-44  | mCD301b- DTR |
| Nans     | -0.4459   | 0.797 | 0.53  | 6.02E-49  | 8.66E-45  | mCD301b- DTR |
| Igsf8    | -0.4456   | 0.466 | 0.169 | 7.55E-55  | 1.09E-50  | mCD301b- DTR |
| Tmem39a  | -0.4427   | 0.741 | 0.441 | 2.74E-52  | 3.93E-48  | mCD301b- DTR |
| Tpm4     | -0.4425   | 0.906 | 0.693 | 3.99E-58  | 5.74E-54  | mCD301b- DTR |
| Ube2l6   | -0.4362   | 0.874 | 0.671 | 6.81E-47  | 9.79E-43  | mCD301b- DTR |
| Tmbim6   | -0.4359   | 0.933 | 0.77  | 2.10E-60  | 3.01E-56  | mCD301b- DTR |
| Pkib     | -0.4342   | 0.521 | 0.356 | 1.30E-20  | 1.87E-16  | mCD301b- DTR |
| Map2k1   | -0.4338   | 0.6   | 0.262 | 1.05E-59  | 1.51E-55  | mCD301b- DTR |
| Inpp5b   | -0.4319   | 0.455 | 0.171 | 6.51E-49  | 9.36E-45  | mCD301b- DTR |
| Idi1     | -0.4249   | 0.708 | 0.421 | 6.04E-43  | 8.68E-39  | mCD301b- DTR |
| Ebi3     | -0.4246   | 0.384 | 0.131 | 1.84E-41  | 2.65E-37  | mCD301b- DTR |
| Tap2     | -0.4246   | 0.68  | 0.358 | 2.98E-52  | 4.29E-48  | mCD301b- DTR |
| Crip1    | -0.4244   | 0.999 | 1     | 2.84E-61  | 4.08E-57  | mCD301b- DTR |
| Ifitm2   | -0.4242   | 0.862 | 0.681 | 6.71E-41  | 9.65E-37  | mCD301b- DTR |
| Vasp     | -0.4211   | 0.662 | 0.38  | 2.86E-48  | 4.11E-44  | mCD301b- DTR |
| Vcp      | -0.4108   | 0.854 | 0.617 | 2.75E-49  | 3.96E-45  | mCD301b- DTR |
| Tnfrsf18 | -0.4101   | 0.501 | 0.229 | 2.56E-42  | 3.68E-38  | mCD301b- DTR |
| Tyrobp   | -0.4077   | 0.966 | 0.885 | 1.26E-42  | 1.81E-38  | mCD301b- DTR |
| Serpib9  | -0.4068   | 0.928 | 0.807 | 2.19E-35  | 3.15E-31  | mCD301b- DTR |
| Reep5    | -0.4051   | 0.771 | 0.503 | 2.27E-45  | 3.26E-41  | mCD301b- DTR |
| Serpib1a | -0.4051   | 0.477 | 0.367 | 1.32E-09  | 1.90E-05  | mCD301b- DTR |
| Psme2    | -0.4017   | 1     | 0.99  | 1.20E-126 | 1.73E-122 | mCD301b- DTR |

(B)

| gene     | avg_logFC | pct.1 | pct.2 | p_val   | p_val_adj | cluster       |
|----------|-----------|-------|-------|---------|-----------|---------------|
| Klf2     | 1.5021    | 0.759 | 0.38  | 1.1E-73 | 1.7E-69   | mCD301b- tdLN |
| Fos      | 0.7575    | 0.712 | 0.513 | 7.4E-25 | 1.1E-20   | mCD301b- tdLN |
| Eno3     | 0.7260    | 0.894 | 0.727 | 1.3E-45 | 1.9E-41   | mCD301b- tdLN |
| Dusp2    | 0.6617    | 0.514 | 0.264 | 5.2E-21 | 7.8E-17   | mCD301b- tdLN |
| Zmynd15  | 0.6497    | 0.755 | 0.577 | 7.5E-22 | 1.1E-17   | mCD301b- tdLN |
| Ccl5     | 0.6393    | 1     | 0.999 | 2.5E-24 | 3.7E-20   | mCD301b- tdLN |
| Apol7c   | 0.6309    | 0.774 | 0.607 | 2.2E-18 | 3.2E-14   | mCD301b- tdLN |
| Cxcl1    | 0.6066    | 0.2   | 0.121 | 4.8E-06 | 7.1E-02   | mCD301b- tdLN |
| Tmem176a | 0.5765    | 0.998 | 0.977 | 4.7E-64 | 7.1E-60   | mCD301b- tdLN |
| Etv3     | 0.5638    | 0.858 | 0.738 | 3.1E-40 | 4.6E-36   | mCD301b- tdLN |
| Icosl    | 0.5620    | 0.441 | 0.208 | 1.2E-23 | 1.7E-19   | mCD301b- tdLN |
| Klf6     | 0.5600    | 0.988 | 0.984 | 1.8E-42 | 2.7E-38   | mCD301b- tdLN |
| Zfp36    | 0.5552    | 0.875 | 0.805 | 3.5E-29 | 5.3E-25   | mCD301b- tdLN |
| Gnl2     | 0.5491    | 0.698 | 0.539 | 3.3E-22 | 5.0E-18   | mCD301b- tdLN |
| Serinc3  | 0.5376    | 0.413 | 0.147 | 3.4E-33 | 5.0E-29   | mCD301b- tdLN |
| Jund     | 0.5271    | 0.814 | 0.731 | 3.1E-26 | 4.6E-22   | mCD301b- tdLN |
| Junb     | 0.5216    | 0.958 | 0.941 | 7.3E-30 | 1.1E-25   | mCD301b- tdLN |
| Ppp1r15a | 0.5207    | 0.896 | 0.763 | 3.2E-33 | 4.9E-29   | mCD301b- tdLN |

| gene      | avg_logFC | pct.1 | pct.2 | p_val   | p_val_adj | cluster       |
|-----------|-----------|-------|-------|---------|-----------|---------------|
| Cited2    | 0.5201    | 0.441 | 0.344 | 2.0E-18 | 3.0E-14   | mCD301b- tdLN |
| Tspan3    | 0.5197    | 0.941 | 0.908 | 1.2E-26 | 1.8E-22   | mCD301b- tdLN |
| Tmem176b  | 0.5169    | 0.993 | 0.988 | 2.6E-61 | 3.9E-57   | mCD301b- tdLN |
| Jun       | 0.5157    | 0.873 | 0.825 | 5.0E-19 | 7.4E-15   | mCD301b- tdLN |
| H3f3b     | 0.5020    | 1     | 0.999 | 6.9E-45 | 1.0E-40   | mCD301b- tdLN |
| Fosb      | 0.4781    | 0.351 | 0.179 | 8.5E-20 | 1.3E-15   | mCD301b- tdLN |
| Tnfrsf1b  | 0.4753    | 0.509 | 0.366 | 1.1E-28 | 1.6E-24   | mCD301b- tdLN |
| Tbc1d4    | 0.4734    | 0.976 | 0.949 | 1.7E-34 | 2.5E-30   | mCD301b- tdLN |
| Klf4      | 0.4693    | 0.377 | 0.243 | 6.8E-16 | 1.0E-11   | mCD301b- tdLN |
| Tubb2a    | 0.4654    | 0.686 | 0.545 | 6.4E-19 | 9.6E-15   | mCD301b- tdLN |
| Hist1h2bc | 0.4648    | 0.491 | 0.406 | 4.1E-11 | 6.2E-07   | mCD301b- tdLN |
| Pmaip1    | 0.4590    | 0.767 | 0.65  | 4.7E-19 | 7.0E-15   | mCD301b- tdLN |
| Pygl      | 0.4589    | 0.392 | 0.181 | 3.5E-19 | 5.2E-15   | mCD301b- tdLN |
| Nabp1     | 0.4562    | 0.488 | 0.329 | 1.9E-18 | 2.8E-14   | mCD301b- tdLN |
| Tmem158   | 0.4561    | 0.222 | 0.042 | 1.0E-19 | 1.6E-15   | mCD301b- tdLN |
| Tubb2b    | 0.4545    | 0.368 | 0.185 | 2.3E-12 | 3.5E-08   | mCD301b- tdLN |
| Phf11a    | 0.4448    | 0.446 | 0.272 | 5.5E-17 | 8.2E-13   | mCD301b- tdLN |
| Birc2     | 0.4432    | 0.858 | 0.795 | 4.2E-24 | 6.3E-20   | mCD301b- tdLN |
| Lmo4      | 0.4319    | 0.264 | 0.072 | 4.6E-20 | 6.9E-16   | mCD301b- tdLN |
| Rgs1      | 0.4314    | 0.96  | 0.957 | 6.3E-18 | 9.4E-14   | mCD301b- tdLN |
| Malat1    | 0.4304    | 1     | 0.999 | 3.9E-44 | 5.8E-40   | mCD301b- tdLN |
| Mxd1      | 0.4213    | 0.835 | 0.78  | 5.9E-20 | 8.8E-16   | mCD301b- tdLN |
| H2-Q4     | 0.4170    | 0.868 | 0.789 | 1.6E-25 | 2.4E-21   | mCD301b- tdLN |
| Ndn12     | 0.4162    | 0.575 | 0.478 | 5.5E-18 | 8.3E-14   | mCD301b- tdLN |
| Dusp1     | 0.4157    | 0.955 | 0.922 | 3.2E-18 | 4.8E-14   | mCD301b- tdLN |
| Nmrk1     | 0.4156    | 0.406 | 0.223 | 2.1E-20 | 3.1E-16   | mCD301b- tdLN |
| Phf11b    | 0.4153    | 0.785 | 0.699 | 6.3E-21 | 9.5E-17   | mCD301b- tdLN |
| Rrad      | 0.4094    | 0.257 | 0.23  | 2.3E-15 | 3.4E-11   | mCD301b- tdLN |
| Atf3      | 0.4087    | 0.417 | 0.318 | 1.3E-10 | 1.9E-06   | mCD301b- tdLN |
| Tmem123   | 0.4025    | 1     | 0.999 | 6.6E-42 | 9.9E-38   | mCD301b- tdLN |
| Ucp2      | 0.3998    | 0.731 | 0.64  | 1.2E-20 | 1.8E-16   | mCD301b- tdLN |
| Spint2    | 0.3996    | 0.96  | 0.948 | 6.9E-31 | 1.0E-26   | mCD301b- tdLN |
| Slc38a2   | 0.3961    | 0.514 | 0.367 | 4.2E-18 | 6.3E-14   | mCD301b- tdLN |
| Frm4a     | 0.3918    | 0.509 | 0.382 | 5.6E-17 | 8.4E-13   | mCD301b- tdLN |
| Skil      | 0.3907    | 0.469 | 0.305 | 1.6E-14 | 2.4E-10   | mCD301b- tdLN |
| Bhlhe40   | 0.3828    | 0.726 | 0.679 | 1.7E-20 | 2.5E-16   | mCD301b- tdLN |
| Rcsd1     | 0.3722    | 0.88  | 0.776 | 6.1E-18 | 9.1E-14   | mCD301b- tdLN |
| Apol10b   | 0.3713    | 0.262 | 0.159 | 2.9E-17 | 4.3E-13   | mCD301b- tdLN |
| Stard7    | 0.3657    | 0.491 | 0.335 | 1.4E-17 | 2.1E-13   | mCD301b- tdLN |
| Ccnd1     | 0.3644    | 0.42  | 0.329 | 7.6E-09 | 1.1E-04   | mCD301b- tdLN |
| Rgs2      | 0.3644    | 0.314 | 0.195 | 7.5E-12 | 1.1E-07   | mCD301b- tdLN |
| Epsti1    | 0.3626    | 1     | 0.991 | 8.3E-20 | 1.2E-15   | mCD301b- tdLN |
| H3f3a     | 0.3606    | 0.995 | 0.988 | 4.7E-28 | 7.1E-24   | mCD301b- tdLN |
| Tnfrsf4   | 0.3594    | 0.785 | 0.695 | 1.5E-09 | 2.3E-05   | mCD301b- tdLN |
| Pim1      | 0.3571    | 0.913 | 0.909 | 4.0E-18 | 5.9E-14   | mCD301b- tdLN |
| Btg2      | 0.3528    | 0.601 | 0.499 | 9.4E-11 | 1.4E-06   | mCD301b- tdLN |
| Tnfaip3   | 0.3464    | 0.568 | 0.499 | 1.2E-17 | 1.8E-13   | mCD301b- tdLN |
| Ostf1     | 0.3437    | 0.981 | 0.99  | 4.5E-24 | 6.7E-20   | mCD301b- tdLN |
| Csrnp1    | 0.3423    | 0.41  | 0.327 | 4.0E-20 | 6.0E-16   | mCD301b- tdLN |
| Chka      | 0.3382    | 0.42  | 0.319 | 4.0E-11 | 6.0E-07   | mCD301b- tdLN |
| Ankrd35   | 0.3377    | 0.368 | 0.253 | 2.1E-13 | 3.1E-09   | mCD301b- tdLN |
| Plxnc1    | 0.3377    | 0.58  | 0.481 | 1.2E-18 | 1.8E-14   | mCD301b- tdLN |

| gene     | avg_logFC | pct.1 | pct.2 | p_val   | p_val_adj | cluster       |
|----------|-----------|-------|-------|---------|-----------|---------------|
| Cd83     | 0.3376    | 0.91  | 0.922 | 3.6E-17 | 5.4E-13   | mCD301b- tdLN |
| Tmem19   | 0.3331    | 0.521 | 0.445 | 9.4E-17 | 1.4E-12   | mCD301b- tdLN |
| Fam53b   | 0.3309    | 0.524 | 0.389 | 9.2E-11 | 1.4E-06   | mCD301b- tdLN |
| Kmt2e    | 0.3293    | 0.448 | 0.371 | 1.8E-18 | 2.7E-14   | mCD301b- tdLN |
| Arhgap22 | 0.3276    | 0.597 | 0.53  | 2.8E-16 | 4.2E-12   | mCD301b- tdLN |
| Kctd12   | 0.3263    | 0.311 | 0.207 | 8.2E-13 | 1.2E-08   | mCD301b- tdLN |
| H2-K1    | 0.3241    | 1     | 1     | 4.0E-39 | 6.0E-35   | mCD301b- tdLN |
| Zfp36l1  | 0.3220    | 0.955 | 0.942 | 6.1E-15 | 9.1E-11   | mCD301b- tdLN |
| H2-D1    | 0.3212    | 1     | 1     | 4.9E-51 | 7.4E-47   | mCD301b- tdLN |
| Creg1    | 0.3166    | 0.526 | 0.426 | 1.3E-11 | 1.9E-07   | mCD301b- tdLN |
| Htra2    | 0.3142    | 0.764 | 0.74  | 1.4E-21 | 2.1E-17   | mCD301b- tdLN |
| Ii1b     | 0.3135    | 0.241 | 0.179 | 3.0E-04 | 1.0E+00   | mCD301b- tdLN |
| Sec11c   | 0.3121    | 0.842 | 0.803 | 4.7E-14 | 7.0E-10   | mCD301b- tdLN |
| Nfkbia   | 0.3119    | 0.995 | 0.996 | 4.2E-15 | 6.3E-11   | mCD301b- tdLN |
| H2-Eb2   | 0.3097    | 0.283 | 0.165 | 1.6E-10 | 2.4E-06   | mCD301b- tdLN |
| Bmp2k    | 0.3095    | 0.71  | 0.678 | 1.4E-16 | 2.1E-12   | mCD301b- tdLN |
| Man1a    | 0.3085    | 0.363 | 0.23  | 5.0E-12 | 7.5E-08   | mCD301b- tdLN |
| Rap2b    | 0.3055    | 0.783 | 0.73  | 2.4E-14 | 3.6E-10   | mCD301b- tdLN |
| Laptm5   | 0.3046    | 0.767 | 0.718 | 4.0E-13 | 6.0E-09   | mCD301b- tdLN |
| Cers6    | 0.3042    | 0.439 | 0.376 | 2.6E-16 | 3.9E-12   | mCD301b- tdLN |
| Relb     | 0.3033    | 0.976 | 0.98  | 2.1E-20 | 3.1E-16   | mCD301b- tdLN |
| Rassf4   | 0.3025    | 0.559 | 0.481 | 1.5E-13 | 2.2E-09   | mCD301b- tdLN |
| Glipr1   | 0.3014    | 0.443 | 0.312 | 2.8E-10 | 4.2E-06   | mCD301b- tdLN |
| Mthfsl   | 0.2972    | 0.71  | 0.636 | 2.8E-12 | 4.2E-08   | mCD301b- tdLN |
| Ccl17    | 2.1187    | 0.798 | 0.248 | 2.4E-86 | 3.5E-82   | mCD301b- DTR  |
| Ccl22    | 1.3770    | 0.941 | 0.63  | 6.7E-72 | 1.0E-67   | mCD301b- DTR  |
| Ccl24    | 1.1418    | 0.202 | 0.002 | 2.2E-29 | 3.2E-25   | mCD301b- DTR  |
| Lgals1   | 1.0860    | 0.854 | 0.465 | 1.0E-67 | 1.5E-63   | mCD301b- DTR  |
| Cd1d2    | 0.9156    | 0.526 | 0.066 | 1.9E-63 | 2.8E-59   | mCD301b- DTR  |
| AA467197 | 0.8983    | 0.769 | 0.349 | 3.1E-55 | 4.6E-51   | mCD301b- DTR  |
| Gm13546  | 0.8761    | 0.539 | 0.12  | 3.8E-54 | 5.6E-50   | mCD301b- DTR  |
| Pkib     | 0.8452    | 0.432 | 0.087 | 1.6E-39 | 2.3E-35   | mCD301b- DTR  |
| Ramp3    | 0.8316    | 0.705 | 0.321 | 2.1E-45 | 3.2E-41   | mCD301b- DTR  |
| Cytip    | 0.7920    | 0.84  | 0.465 | 1.0E-52 | 1.5E-48   | mCD301b- DTR  |
| S100a10  | 0.7663    | 0.61  | 0.29  | 2.0E-28 | 3.0E-24   | mCD301b- DTR  |
| Ccnd2    | 0.7045    | 0.607 | 0.323 | 2.5E-24 | 3.8E-20   | mCD301b- DTR  |
| Capg     | 0.6362    | 0.519 | 0.196 | 4.6E-30 | 6.9E-26   | mCD301b- DTR  |
| Rps27l   | 0.6274    | 0.994 | 0.95  | 2.7E-53 | 4.0E-49   | mCD301b- DTR  |
| Fabp5    | 0.6111    | 0.978 | 0.955 | 3.7E-25 | 5.6E-21   | mCD301b- DTR  |
| Slc27a3  | 0.5627    | 0.311 | 0.042 | 2.1E-30 | 3.1E-26   | mCD301b- DTR  |
| Cst3     | 0.5446    | 1     | 0.995 | 9.8E-44 | 1.5E-39   | mCD301b- DTR  |
| Tnip3    | 0.5392    | 0.512 | 0.193 | 1.3E-25 | 2.0E-21   | mCD301b- DTR  |
| Vim      | 0.5335    | 0.952 | 0.856 | 1.4E-17 | 2.2E-13   | mCD301b- DTR  |
| Stat4    | 0.5055    | 0.595 | 0.283 | 1.7E-24 | 2.5E-20   | mCD301b- DTR  |
| Amica1   | 0.4985    | 0.353 | 0.075 | 5.1E-28 | 7.6E-24   | mCD301b- DTR  |
| Cd86     | 0.4835    | 0.809 | 0.517 | 2.1E-24 | 3.2E-20   | mCD301b- DTR  |
| Cnn3     | 0.4734    | 0.473 | 0.165 | 6.1E-27 | 9.1E-23   | mCD301b- DTR  |
| Gsn      | 0.4592    | 0.366 | 0.108 | 1.5E-21 | 2.3E-17   | mCD301b- DTR  |
| H2afy    | 0.4539    | 0.772 | 0.436 | 2.9E-29 | 4.3E-25   | mCD301b- DTR  |
| Got1     | 0.4445    | 0.409 | 0.156 | 1.3E-18 | 1.9E-14   | mCD301b- DTR  |
| Ptpn1    | 0.4438    | 0.639 | 0.349 | 5.5E-25 | 8.2E-21   | mCD301b- DTR  |
| Cd302    | 0.4429    | 0.406 | 0.151 | 3.8E-20 | 5.7E-16   | mCD301b- DTR  |

| gene      | avg_logFC | pct.1 | pct.2 | p_val   | p_val_adj | cluster      |
|-----------|-----------|-------|-------|---------|-----------|--------------|
| Pdcd1lg2  | 0.4404    | 0.506 | 0.191 | 4.6E-25 | 6.9E-21   | mCD301b- DTR |
| Plgkrt    | 0.4396    | 0.676 | 0.41  | 3.1E-20 | 4.7E-16   | mCD301b- DTR |
| Serpib6b  | 0.4262    | 0.981 | 0.908 | 9.2E-25 | 1.4E-20   | mCD301b- DTR |
| Rps6      | 0.4028    | 0.997 | 0.988 | 1.2E-35 | 1.8E-31   | mCD301b- DTR |
| Tyms      | 0.4027    | 0.353 | 0.064 | 6.3E-30 | 9.4E-26   | mCD301b- DTR |
| Serpib1a  | 0.3920    | 0.403 | 0.283 | 2.6E-04 | 1.0E+00   | mCD301b- DTR |
| Glpr2     | 0.3903    | 0.965 | 0.875 | 9.9E-20 | 1.5E-15   | mCD301b- DTR |
| Stat1     | 0.3889    | 0.788 | 0.517 | 7.3E-21 | 1.1E-16   | mCD301b- DTR |
| Tspo      | 0.3887    | 0.994 | 0.969 | 2.7E-27 | 4.0E-23   | mCD301b- DTR |
| Mkrn1     | 0.3865    | 0.675 | 0.382 | 1.9E-21 | 2.8E-17   | mCD301b- DTR |
| Gapdh     | 0.3813    | 0.951 | 0.844 | 1.3E-18 | 1.9E-14   | mCD301b- DTR |
| Coro1a    | 0.3805    | 0.837 | 0.632 | 5.2E-16 | 7.8E-12   | mCD301b- DTR |
| Fkbp1a    | 0.3764    | 0.611 | 0.344 | 8.2E-19 | 1.2E-14   | mCD301b- DTR |
| Selm      | 0.3737    | 0.665 | 0.491 | 5.7E-08 | 8.6E-04   | mCD301b- DTR |
| Myl12a    | 0.3625    | 0.961 | 0.92  | 8.6E-17 | 1.3E-12   | mCD301b- DTR |
| Rps11     | 0.3612    | 1     | 0.998 | 5.1E-55 | 7.7E-51   | mCD301b- DTR |
| Rps4x     | 0.3597    | 0.997 | 0.96  | 1.4E-29 | 2.0E-25   | mCD301b- DTR |
| H2-DMA    | 0.3597    | 0.655 | 0.429 | 3.1E-12 | 4.6E-08   | mCD301b- DTR |
| PsmA6     | 0.3591    | 0.866 | 0.71  | 8.4E-18 | 1.3E-13   | mCD301b- DTR |
| Txn1      | 0.3563    | 0.978 | 0.917 | 2.3E-16 | 3.5E-12   | mCD301b- DTR |
| Nostrin   | 0.3558    | 0.772 | 0.524 | 2.7E-17 | 4.0E-13   | mCD301b- DTR |
| Acot7     | 0.3555    | 0.458 | 0.205 | 8.2E-17 | 1.2E-12   | mCD301b- DTR |
| Lyz2      | 0.3503    | 0.608 | 0.384 | 7.0E-13 | 1.0E-08   | mCD301b- DTR |
| SyngR2    | 0.3494    | 0.991 | 0.965 | 1.6E-21 | 2.4E-17   | mCD301b- DTR |
| Actg1     | 0.3483    | 1     | 1     | 1.2E-36 | 1.9E-32   | mCD301b- DTR |
| Lcp1      | 0.3477    | 0.829 | 0.653 | 1.1E-13 | 1.7E-09   | mCD301b- DTR |
| Rpl12     | 0.3447    | 0.873 | 0.684 | 4.1E-17 | 6.1E-13   | mCD301b- DTR |
| Rab8b     | 0.3442    | 0.738 | 0.493 | 4.7E-16 | 7.0E-12   | mCD301b- DTR |
| Lactb     | 0.3440    | 0.764 | 0.542 | 7.4E-15 | 1.1E-10   | mCD301b- DTR |
| Ehd1      | 0.3408    | 0.506 | 0.267 | 3.9E-14 | 5.9E-10   | mCD301b- DTR |
| Procr     | 0.3356    | 0.382 | 0.16  | 3.9E-14 | 5.9E-10   | mCD301b- DTR |
| Lgals3    | 0.3335    | 0.655 | 0.453 | 1.9E-11 | 2.9E-07   | mCD301b- DTR |
| Cd9       | 0.3330    | 0.587 | 0.354 | 7.9E-13 | 1.2E-08   | mCD301b- DTR |
| Slc25a3   | 0.3318    | 0.876 | 0.703 | 2.0E-17 | 3.0E-13   | mCD301b- DTR |
| Rpl10a    | 0.3314    | 0.939 | 0.854 | 1.4E-14 | 2.0E-10   | mCD301b- DTR |
| CIta      | 0.3307    | 0.962 | 0.87  | 6.9E-18 | 1.0E-13   | mCD301b- DTR |
| S100a6    | 0.3307    | 0.962 | 0.875 | 3.1E-15 | 4.7E-11   | mCD301b- DTR |
| Serpina3g | 0.3298    | 0.543 | 0.302 | 2.5E-14 | 3.7E-10   | mCD301b- DTR |
| Eno1      | 0.3287    | 0.519 | 0.271 | 1.3E-15 | 2.0E-11   | mCD301b- DTR |
| Tnfaip8   | 0.3280    | 0.682 | 0.448 | 4.7E-14 | 7.0E-10   | mCD301b- DTR |
| Lrrc58    | 0.3278    | 0.91  | 0.764 | 3.3E-16 | 4.9E-12   | mCD301b- DTR |
| Gpx1      | 0.3258    | 0.835 | 0.608 | 3.4E-16 | 5.0E-12   | mCD301b- DTR |
| Zbp1      | 0.3254    | 0.457 | 0.219 | 6.9E-15 | 1.0E-10   | mCD301b- DTR |
| Gdi2      | 0.3244    | 0.883 | 0.708 | 3.9E-17 | 5.8E-13   | mCD301b- DTR |
| Cfl1      | 0.3232    | 0.994 | 0.955 | 1.3E-19 | 1.9E-15   | mCD301b- DTR |
| Srgn      | 0.3225    | 1     | 0.991 | 4.9E-25 | 7.3E-21   | mCD301b- DTR |
| Rab14     | 0.3221    | 0.832 | 0.59  | 1.6E-18 | 2.4E-14   | mCD301b- DTR |
| Glrx      | 0.3215    | 0.62  | 0.389 | 1.0E-12 | 1.5E-08   | mCD301b- DTR |
| Eva1b     | 0.3184    | 0.592 | 0.356 | 1.7E-13 | 2.5E-09   | mCD301b- DTR |
| Cd80      | 0.3120    | 0.402 | 0.203 | 7.1E-12 | 1.1E-07   | mCD301b- DTR |
| Prps1     | 0.3090    | 0.289 | 0.101 | 2.3E-17 | 3.4E-13   | mCD301b- DTR |
| Tspan13   | 0.3078    | 0.658 | 0.432 | 1.4E-12 | 2.1E-08   | mCD301b- DTR |

| gene          | avg_logFC | pct.1 | pct.2 | p_val    | p_val_adj | cluster       |
|---------------|-----------|-------|-------|----------|-----------|---------------|
| Rpl10         | 0.3076    | 1     | 0.976 | 3.5E-28  | 5.3E-24   | mCD301b- DTR  |
| Rps8          | 0.3045    | 0.965 | 0.915 | 5.8E-15  | 8.7E-11   | mCD301b- DTR  |
| Rps17         | 0.3029    | 0.883 | 0.731 | 4.5E-13  | 6.8E-09   | mCD301b- DTR  |
| Arpc1b        | 0.3010    | 0.996 | 0.965 | 1.1E-23  | 1.7E-19   | mCD301b- DTR  |
| Cxcl1         | 1.3860    | 0.437 | 0.162 | 3.8E-56  | 5.6E-52   | mCD301b+ tdLN |
| Klf2          | 1.2722    | 0.785 | 0.406 | 3.3E-111 | 4.9E-107  | mCD301b+ tdLN |
| Fxyd2         | 0.9176    | 0.577 | 0.294 | 2.1E-57  | 3.2E-53   | mCD301b+ tdLN |
| Clu           | 0.7647    | 0.684 | 0.513 | 5.9E-34  | 8.8E-30   | mCD301b+ tdLN |
| Tmem158       | 0.6672    | 0.346 | 0.109 | 2.0E-43  | 3.0E-39   | mCD301b+ tdLN |
| Tspan3        | 0.6556    | 0.938 | 0.836 | 2.0E-68  | 3.0E-64   | mCD301b+ tdLN |
| Fos           | 0.6494    | 0.842 | 0.683 | 1.2E-38  | 1.8E-34   | mCD301b+ tdLN |
| Dusp2         | 0.6481    | 0.526 | 0.277 | 6.3E-35  | 9.5E-31   | mCD301b+ tdLN |
| Glipr1        | 0.6254    | 0.692 | 0.414 | 4.6E-65  | 6.8E-61   | mCD301b+ tdLN |
| Apol7c        | 0.6138    | 0.87  | 0.698 | 2.6E-51  | 3.9E-47   | mCD301b+ tdLN |
| Fosb          | 0.6039    | 0.535 | 0.291 | 1.8E-42  | 2.7E-38   | mCD301b+ tdLN |
| Eno3          | 0.5701    | 0.714 | 0.526 | 1.2E-48  | 1.7E-44   | mCD301b+ tdLN |
| Atf3          | 0.5360    | 0.635 | 0.394 | 1.0E-35  | 1.5E-31   | mCD301b+ tdLN |
| Mfge8         | 0.5262    | 0.431 | 0.279 | 3.0E-21  | 4.5E-17   | mCD301b+ tdLN |
| Ppp1r15a      | 0.5217    | 0.854 | 0.753 | 1.1E-55  | 1.6E-51   | mCD301b+ tdLN |
| H2-M2         | 0.5135    | 0.669 | 0.598 | 5.0E-21  | 7.5E-17   | mCD301b+ tdLN |
| Gnl2          | 0.4904    | 0.525 | 0.31  | 4.1E-32  | 6.1E-28   | mCD301b+ tdLN |
| Bhlhe40       | 0.4848    | 0.715 | 0.574 | 2.5E-37  | 3.7E-33   | mCD301b+ tdLN |
| Creg1         | 0.4590    | 0.608 | 0.4   | 1.8E-36  | 2.6E-32   | mCD301b+ tdLN |
| Ii4i1         | 0.4543    | 0.863 | 0.837 | 6.1E-38  | 9.0E-34   | mCD301b+ tdLN |
| Cxcl2         | 0.4524    | 0.314 | 0.17  | 6.4E-13  | 9.6E-09   | mCD301b+ tdLN |
| Etv3          | 0.4512    | 0.914 | 0.805 | 2.4E-47  | 3.5E-43   | mCD301b+ tdLN |
| Tnfaip3       | 0.4505    | 0.69  | 0.539 | 8.9E-36  | 1.3E-31   | mCD301b+ tdLN |
| Hspa1a        | 0.4471    | 0.264 | 0.137 | 2.8E-13  | 4.3E-09   | mCD301b+ tdLN |
| Rap2b         | 0.4451    | 0.769 | 0.657 | 1.5E-43  | 2.2E-39   | mCD301b+ tdLN |
| Junb          | 0.4414    | 0.954 | 0.939 | 4.1E-43  | 6.1E-39   | mCD301b+ tdLN |
| Tubb2a        | 0.4342    | 0.521 | 0.338 | 1.8E-28  | 2.7E-24   | mCD301b+ tdLN |
| Lmo4          | 0.4320    | 0.382 | 0.199 | 8.2E-27  | 1.2E-22   | mCD301b+ tdLN |
| Ier2          | 0.4314    | 0.545 | 0.37  | 3.2E-21  | 4.7E-17   | mCD301b+ tdLN |
| M1ap          | 0.4239    | 0.388 | 0.205 | 6.9E-26  | 1.0E-21   | mCD301b+ tdLN |
| Ehf           | 0.4237    | 0.371 | 0.163 | 2.5E-28  | 3.7E-24   | mCD301b+ tdLN |
| Cdc42ep3      | 0.4220    | 0.732 | 0.674 | 3.2E-31  | 4.8E-27   | mCD301b+ tdLN |
| Tmem176b      | 0.4191    | 0.981 | 0.962 | 3.6E-67  | 5.4E-63   | mCD301b+ tdLN |
| Pvr           | 0.4168    | 0.468 | 0.265 | 6.4E-30  | 9.6E-26   | mCD301b+ tdLN |
| 2610528A11Rik | 0.4156    | 0.138 | 0.046 | 3.7E-13  | 5.6E-09   | mCD301b+ tdLN |
| Evi2a         | 0.4144    | 0.326 | 0.129 | 3.2E-33  | 4.8E-29   | mCD301b+ tdLN |
| Tmem176a      | 0.4122    | 0.971 | 0.936 | 6.0E-56  | 8.9E-52   | mCD301b+ tdLN |
| Rgs2          | 0.4069    | 0.388 | 0.217 | 2.9E-20  | 4.3E-16   | mCD301b+ tdLN |
| Jund          | 0.4031    | 0.874 | 0.818 | 3.7E-33  | 5.5E-29   | mCD301b+ tdLN |
| Cited2        | 0.4021    | 0.479 | 0.353 | 8.3E-18  | 1.2E-13   | mCD301b+ tdLN |
| Skil          | 0.4015    | 0.532 | 0.352 | 6.1E-28  | 9.2E-24   | mCD301b+ tdLN |
| Cd44          | 0.3958    | 0.767 | 0.662 | 2.3E-29  | 3.4E-25   | mCD301b+ tdLN |
| Jun           | 0.3954    | 0.776 | 0.715 | 2.4E-16  | 3.6E-12   | mCD301b+ tdLN |
| Hist1h1c      | 0.3933    | 0.532 | 0.412 | 3.4E-18  | 5.1E-14   | mCD301b+ tdLN |
| Egr1          | 0.3927    | 0.229 | 0.069 | 5.3E-23  | 8.0E-19   | mCD301b+ tdLN |
| Gpr183        | 0.3881    | 0.311 | 0.171 | 3.7E-15  | 5.5E-11   | mCD301b+ tdLN |
| Nfkbia        | 0.3849    | 0.99  | 0.988 | 4.8E-28  | 7.1E-24   | mCD301b+ tdLN |
| Klf4          | 0.3773    | 0.435 | 0.271 | 1.1E-17  | 1.7E-13   | mCD301b+ tdLN |

| gene      | avg_logFC | pct.1 | pct.2 | p_val    | p_val_adj | cluster       |
|-----------|-----------|-------|-------|----------|-----------|---------------|
| Tubb6     | 0.3725    | 0.4   | 0.267 | 6.5E-25  | 9.8E-21   | mCD301b+ tdLN |
| Nfkbiz    | 0.3702    | 0.593 | 0.469 | 7.8E-23  | 1.2E-18   | mCD301b+ tdLN |
| Rrad      | 0.3659    | 0.349 | 0.242 | 1.1E-10  | 1.7E-06   | mCD301b+ tdLN |
| Klf6      | 0.3643    | 0.957 | 0.941 | 1.6E-25  | 2.4E-21   | mCD301b+ tdLN |
| Ccl9      | 0.3629    | 0.275 | 0.154 | 1.1E-11  | 1.7E-07   | mCD301b+ tdLN |
| Hist1h2bc | 0.3625    | 0.632 | 0.506 | 8.0E-14  | 1.2E-09   | mCD301b+ tdLN |
| Ucp2      | 0.3613    | 0.793 | 0.714 | 1.1E-35  | 1.6E-31   | mCD301b+ tdLN |
| Cd83      | 0.3581    | 0.875 | 0.867 | 2.4E-28  | 3.6E-24   | mCD301b+ tdLN |
| Mycbp2    | 0.3573    | 0.706 | 0.565 | 2.4E-26  | 3.6E-22   | mCD301b+ tdLN |
| Sat1      | 0.3566    | 0.915 | 0.861 | 2.0E-30  | 3.0E-26   | mCD301b+ tdLN |
| Gm10116   | 0.3564    | 0.594 | 0.449 | 8.6E-31  | 1.3E-26   | mCD301b+ tdLN |
| Rhob      | 0.3546    | 0.328 | 0.149 | 4.8E-23  | 7.2E-19   | mCD301b+ tdLN |
| Ftl1      | 0.3539    | 0.999 | 1     | 1.4E-43  | 2.1E-39   | mCD301b+ tdLN |
| Pmaip1    | 0.3498    | 0.803 | 0.689 | 3.2E-19  | 4.8E-15   | mCD301b+ tdLN |
| Basp1     | 0.3408    | 0.864 | 0.812 | 3.2E-29  | 4.8E-25   | mCD301b+ tdLN |
| Zfp36     | 0.3382    | 0.903 | 0.857 | 8.4E-25  | 1.3E-20   | mCD301b+ tdLN |
| Fgl2      | 0.3321    | 0.408 | 0.286 | 2.0E-15  | 3.0E-11   | mCD301b+ tdLN |
| Lmna      | 0.3315    | 0.391 | 0.25  | 5.1E-21  | 7.6E-17   | mCD301b+ tdLN |
| Vcam1     | 0.3265    | 0.286 | 0.136 | 3.8E-19  | 5.7E-15   | mCD301b+ tdLN |
| Tnf       | 0.3255    | 0.208 | 0.081 | 4.7E-18  | 7.1E-14   | mCD301b+ tdLN |
| Zeb2      | 0.3235    | 0.455 | 0.328 | 9.8E-20  | 1.5E-15   | mCD301b+ tdLN |
| Galnt12   | 0.3229    | 0.421 | 0.255 | 1.4E-22  | 2.2E-18   | mCD301b+ tdLN |
| Birc2     | 0.3175    | 0.834 | 0.787 | 4.8E-25  | 7.1E-21   | mCD301b+ tdLN |
| Ostf1     | 0.3163    | 0.942 | 0.942 | 6.3E-32  | 9.4E-28   | mCD301b+ tdLN |
| Brk1      | 0.3143    | 0.926 | 0.912 | 2.8E-29  | 4.2E-25   | mCD301b+ tdLN |
| Adm       | 0.3135    | 0.215 | 0.091 | 6.0E-20  | 9.0E-16   | mCD301b+ tdLN |
| Vrk2      | 0.3076    | 0.411 | 0.274 | 1.8E-19  | 2.8E-15   | mCD301b+ tdLN |
| Anxa3     | 0.3066    | 0.976 | 0.968 | 3.1E-37  | 4.6E-33   | mCD301b+ tdLN |
| Dkk1      | 0.3040    | 0.229 | 0.071 | 4.0E-25  | 6.0E-21   | mCD301b+ tdLN |
| Adgre4    | 0.3017    | 0.159 | 0.016 | 1.6E-32  | 2.4E-28   | mCD301b+ tdLN |
| Il1b      | 0.3017    | 0.27  | 0.227 | 1.6E-04  | 1.0E+00   | mCD301b+ tdLN |
| Ptgs2     | 0.3012    | 0.325 | 0.198 | 2.7E-09  | 4.0E-05   | mCD301b+ tdLN |
| Rps3a1    | 0.3010    | 0.998 | 1     | 2.2E-53  | 3.3E-49   | mCD301b+ tdLN |
| Tmem123   | 0.3001    | 0.998 | 0.995 | 7.0E-34  | 1.1E-29   | mCD301b+ tdLN |
| Gm13546   | 1.3265    | 0.653 | 0.11  | 8.2E-164 | 1.2E-159  | mCD301b+ DTR  |
| Ccl17     | 1.1178    | 0.792 | 0.637 | 4.2E-40  | 6.3E-36   | mCD301b+ DTR  |
| Pkib      | 1.0191    | 0.449 | 0.063 | 1.1E-93  | 1.7E-89   | mCD301b+ DTR  |
| Ramp3     | 0.9060    | 0.509 | 0.12  | 2.4E-82  | 3.6E-78   | mCD301b+ DTR  |
| Cst3      | 0.8259    | 0.999 | 0.999 | 6.0E-82  | 8.9E-78   | mCD301b+ DTR  |
| Gyg       | 0.8185    | 0.829 | 0.58  | 1.6E-68  | 2.4E-64   | mCD301b+ DTR  |
| Glipr2    | 0.8113    | 0.788 | 0.505 | 9.8E-84  | 1.5E-79   | mCD301b+ DTR  |
| AA467197  | 0.7371    | 0.486 | 0.212 | 7.1E-46  | 1.1E-41   | mCD301b+ DTR  |
| Txndc17   | 0.7205    | 0.947 | 0.816 | 1.7E-84  | 2.5E-80   | mCD301b+ DTR  |
| Cytip     | 0.7171    | 0.893 | 0.61  | 3.7E-90  | 5.6E-86   | mCD301b+ DTR  |
| Stat1     | 0.6552    | 0.706 | 0.367 | 1.3E-68  | 1.9E-64   | mCD301b+ DTR  |
| Bcl2l14   | 0.6154    | 0.421 | 0.137 | 1.9E-48  | 2.8E-44   | mCD301b+ DTR  |
| Ccl22     | 0.5922    | 0.922 | 0.778 | 2.6E-37  | 3.8E-33   | mCD301b+ DTR  |
| Slc27a3   | 0.5748    | 0.323 | 0.057 | 1.4E-55  | 2.1E-51   | mCD301b+ DTR  |
| Cita      | 0.5565    | 0.931 | 0.828 | 1.1E-73  | 1.6E-69   | mCD301b+ DTR  |
| Stat4     | 0.5362    | 0.391 | 0.095 | 1.3E-52  | 1.9E-48   | mCD301b+ DTR  |
| Serpib6b  | 0.5220    | 0.923 | 0.781 | 4.4E-42  | 6.6E-38   | mCD301b+ DTR  |
| Got1      | 0.5161    | 0.443 | 0.177 | 8.2E-48  | 1.2E-43   | mCD301b+ DTR  |

| gene     | avg_logFC | pct.1 | pct.2 | p_val   | p_val_adj | cluster      |
|----------|-----------|-------|-------|---------|-----------|--------------|
| Cd86     | 0.5121    | 0.523 | 0.269 | 2.4E-37 | 3.6E-33   | mCD301b+ DTR |
| Pdcd1lg2 | 0.4999    | 0.367 | 0.084 | 3.9E-54 | 5.8E-50   | mCD301b+ DTR |
| Rps27l   | 0.4585    | 0.977 | 0.959 | 7.8E-52 | 1.2E-47   | mCD301b+ DTR |
| Syng1    | 0.4536    | 0.976 | 0.896 | 7.0E-64 | 1.0E-59   | mCD301b+ DTR |
| Plgkt    | 0.4482    | 0.597 | 0.349 | 2.8E-37 | 4.2E-33   | mCD301b+ DTR |
| Ccnd2    | 0.4410    | 0.215 | 0.056 | 4.9E-28 | 7.4E-24   | mCD301b+ DTR |
| Tspo     | 0.4360    | 0.976 | 0.936 | 1.1E-44 | 1.7E-40   | mCD301b+ DTR |
| Actg1    | 0.4239    | 1     | 0.989 | 2.2E-50 | 3.3E-46   | mCD301b+ DTR |
| Cmc2     | 0.4229    | 0.407 | 0.185 | 2.6E-28 | 3.9E-24   | mCD301b+ DTR |
| Ndr1     | 0.4087    | 0.463 | 0.244 | 4.1E-25 | 6.2E-21   | mCD301b+ DTR |
| Rab8b    | 0.4077    | 0.685 | 0.455 | 6.3E-32 | 9.5E-28   | mCD301b+ DTR |
| Selm     | 0.4049    | 0.626 | 0.5   | 4.1E-13 | 6.1E-09   | mCD301b+ DTR |
| Irf8     | 0.4034    | 0.765 | 0.648 | 6.7E-18 | 1.0E-13   | mCD301b+ DTR |
| Lgals1   | 0.4004    | 0.658 | 0.579 | 5.1E-22 | 7.7E-18   | mCD301b+ DTR |
| Lcp1     | 0.3991    | 0.737 | 0.542 | 1.0E-27 | 1.6E-23   | mCD301b+ DTR |
| Gdi2     | 0.3987    | 0.856 | 0.668 | 2.5E-39 | 3.8E-35   | mCD301b+ DTR |
| Cd80     | 0.3964    | 0.326 | 0.095 | 1.6E-35 | 2.4E-31   | mCD301b+ DTR |
| Zfand6   | 0.3959    | 0.875 | 0.748 | 1.7E-37 | 2.5E-33   | mCD301b+ DTR |
| Ncoa7    | 0.3844    | 0.421 | 0.209 | 8.1E-27 | 1.2E-22   | mCD301b+ DTR |
| Lactb    | 0.3835    | 0.574 | 0.347 | 1.2E-29 | 1.8E-25   | mCD301b+ DTR |
| Il7r     | 0.3805    | 0.453 | 0.248 | 1.2E-26 | 1.7E-22   | mCD301b+ DTR |
| Ptpn1    | 0.3785    | 0.442 | 0.213 | 5.2E-29 | 7.8E-25   | mCD301b+ DTR |
| Serp1b9  | 0.3770    | 0.846 | 0.712 | 6.6E-24 | 9.8E-20   | mCD301b+ DTR |
| Crem     | 0.3695    | 0.255 | 0.059 | 1.0E-32 | 1.6E-28   | mCD301b+ DTR |
| Pmvk     | 0.3618    | 0.615 | 0.412 | 3.4E-23 | 5.2E-19   | mCD301b+ DTR |
| Calm1    | 0.3605    | 0.997 | 0.997 | 5.2E-35 | 7.8E-31   | mCD301b+ DTR |
| Txn1     | 0.3591    | 0.943 | 0.878 | 1.8E-27 | 2.7E-23   | mCD301b+ DTR |
| Amica1   | 0.3543    | 0.292 | 0.087 | 8.1E-31 | 1.2E-26   | mCD301b+ DTR |
| Serp3g   | 0.3438    | 0.33  | 0.13  | 4.4E-26 | 6.6E-22   | mCD301b+ DTR |
| Rab14    | 0.3435    | 0.755 | 0.559 | 1.2E-27 | 1.8E-23   | mCD301b+ DTR |
| Mif4gd   | 0.3379    | 0.524 | 0.299 | 2.4E-24 | 3.6E-20   | mCD301b+ DTR |
| Tspan13  | 0.3313    | 0.615 | 0.426 | 4.3E-21 | 6.4E-17   | mCD301b+ DTR |
| Adprh    | 0.3298    | 0.434 | 0.201 | 9.6E-28 | 1.4E-23   | mCD301b+ DTR |
| Lyz2     | 0.3228    | 0.597 | 0.449 | 4.3E-10 | 6.4E-06   | mCD301b+ DTR |
| S100a6   | 0.3193    | 0.952 | 0.896 | 3.7E-22 | 5.5E-18   | mCD301b+ DTR |
| Nt5c     | 0.3176    | 0.647 | 0.435 | 2.1E-23 | 3.1E-19   | mCD301b+ DTR |
| Capg     | 0.3176    | 0.628 | 0.432 | 1.4E-20 | 2.2E-16   | mCD301b+ DTR |
| Slamf1   | 0.3162    | 0.333 | 0.152 | 7.2E-21 | 1.1E-16   | mCD301b+ DTR |
| Cd302    | 0.3159    | 0.292 | 0.134 | 2.9E-20 | 4.4E-16   | mCD301b+ DTR |
| Myl6     | 0.3157    | 0.986 | 0.981 | 2.6E-24 | 3.9E-20   | mCD301b+ DTR |
| Rac1     | 0.3135    | 0.87  | 0.739 | 1.1E-26 | 1.6E-22   | mCD301b+ DTR |
| Lrrfip1  | 0.3126    | 0.436 | 0.246 | 1.0E-20 | 1.5E-16   | mCD301b+ DTR |
| Akap9    | 0.3125    | 0.486 | 0.296 | 1.9E-19 | 2.9E-15   | mCD301b+ DTR |
| Tpm4     | 0.3093    | 0.767 | 0.612 | 3.4E-20 | 5.1E-16   | mCD301b+ DTR |
| Cd274    | 0.3074    | 0.658 | 0.423 | 4.6E-24 | 6.8E-20   | mCD301b+ DTR |
| Dnajc12  | 0.3058    | 0.345 | 0.145 | 8.5E-24 | 1.3E-19   | mCD301b+ DTR |
| Fabp5    | 0.3056    | 0.958 | 0.937 | 1.8E-12 | 2.6E-08   | mCD301b+ DTR |
| Mrpl13   | 0.3035    | 0.431 | 0.246 | 2.0E-19 | 3.0E-15   | mCD301b+ DTR |
| Cd200    | 0.3032    | 0.418 | 0.24  | 4.8E-16 | 7.2E-12   | mCD301b+ DTR |
| Ywhah    | 0.3011    | 0.77  | 0.603 | 2.9E-22 | 4.3E-18   | mCD301b+ DTR |
| Coro1a   | 0.3005    | 0.656 | 0.497 | 1.7E-15 | 2.5E-11   | mCD301b+ DTR |

**Supplemental Table 5 – related to Figure 4. DE between mCD301b<sup>-</sup> and mCD301b<sup>+</sup> in control and *Foxp3*<sup>DTR</sup> tdLN**

(A) DE was performed where mCD301b<sup>-</sup> or mCD301b<sup>+</sup> from *Foxp3*<sup>DTR</sup> tdLN were compared. Relates to volcano plot in Supplemental Figure 4J. Supplementary Table 5B lists all DE genes with log *N* fold change > 0.4. DE parameters: min.pct = 0.25. (B) DE was performed where either mCD301b<sup>-</sup> or mCD301b<sup>+</sup> from control tdLN and *Foxp3*<sup>DTR</sup> tdLN were compared. Volcano plot in Figure 4D displayed all DE genes but highlighted genes with log *N* fold change > 0.4. Supplementary Table 5A lists all DE genes with log *N* fold change > 0.3. DE parameters: min.pct = 0.1.



**Supplemental Table 6**

| gene    | avg_logFC | pct.1 | pct.2 | p_val    | p_val_adj | cluster |
|---------|-----------|-------|-------|----------|-----------|---------|
| FCER1A  | 1.4134    | 0.839 | 0.243 | 6.7E-121 | 1.2E-116  | 0       |
| CD1C    | 1.1697    | 0.766 | 0.2   | 1.2E-120 | 2.1E-116  | 0       |
| CLEC10A | 1.1260    | 0.917 | 0.546 | 5.5E-90  | 9.5E-86   | 0       |
| CD1E    | 0.9994    | 0.64  | 0.177 | 4.0E-82  | 6.9E-78   | 0       |
| LGALS2  | 0.8471    | 0.967 | 0.567 | 1.6E-85  | 2.7E-81   | 0       |
| AREG    | 0.8340    | 0.937 | 0.788 | 2.8E-46  | 4.9E-42   | 0       |
| CFP     | 0.8269    | 0.94  | 0.508 | 1.4E-94  | 2.5E-90   | 0       |
| NDRG2   | 0.7004    | 0.829 | 0.297 | 2.9E-105 | 5.1E-101  | 0       |
| JAML    | 0.6790    | 0.995 | 0.867 | 4.0E-93  | 6.9E-89   | 0       |
| LTB     | 0.6416    | 0.748 | 0.494 | 4.8E-34  | 8.3E-30   | 0       |
| CXCL10  | 1.5549    | 0.494 | 0.196 | 4.1E-36  | 7.2E-32   | 1       |
| S100A8  | 1.3196    | 0.736 | 0.537 | 2.2E-26  | 3.9E-22   | 1       |
| S100A9  | 1.0608    | 0.907 | 0.789 | 1.7E-26  | 2.9E-22   | 1       |
| VAMP5   | 0.9384    | 0.902 | 0.655 | 1.7E-73  | 2.9E-69   | 1       |
| TIMP1   | 0.9195    | 0.928 | 0.881 | 8.6E-27  | 1.5E-22   | 1       |
| CXCL9   | 0.9069    | 0.39  | 0.16  | 9.1E-27  | 1.6E-22   | 1       |
| GBP1    | 0.9015    | 0.783 | 0.471 | 1.1E-52  | 2.0E-48   | 1       |
| FCN1    | 0.8446    | 0.744 | 0.479 | 1.8E-30  | 3.2E-26   | 1       |
| VCAN    | 0.8344    | 0.486 | 0.277 | 2.2E-18  | 3.9E-14   | 1       |
| STAT1   | 0.7899    | 0.879 | 0.577 | 1.4E-65  | 2.4E-61   | 1       |
| CXCL2   | 0.5477    | 0.507 | 0.39  | 1.3E-08  | 2.3E-04   | 2       |
| PHACTR1 | 0.5477    | 0.899 | 0.68  | 2.1E-42  | 3.6E-38   | 2       |
| AREG    | 0.5328    | 0.896 | 0.802 | 1.0E-17  | 1.8E-13   | 2       |
| LYZ     | 0.5173    | 1     | 0.986 | 1.6E-49  | 2.9E-45   | 2       |
| THBD    | 0.5119    | 0.738 | 0.469 | 1.9E-32  | 3.4E-28   | 2       |
| HES1    | 0.5019    | 0.447 | 0.206 | 5.1E-24  | 8.9E-20   | 2       |
| RGS2    | 0.4688    | 0.992 | 0.932 | 7.3E-31  | 1.3E-26   | 2       |
| ZNF331  | 0.4607    | 0.872 | 0.695 | 1.9E-25  | 3.3E-21   | 2       |
| OSM     | 0.4513    | 0.523 | 0.359 | 4.1E-13  | 7.1E-09   | 2       |
| HBEGF   | 0.4399    | 0.796 | 0.565 | 5.5E-25  | 9.6E-21   | 2       |
| APOE    | 2.2950    | 0.996 | 0.61  | 4.2E-122 | 7.3E-118  | 3       |
| RNASE1  | 1.9069    | 0.773 | 0.328 | 4.4E-64  | 7.7E-60   | 3       |
| APOC1   | 1.8721    | 0.992 | 0.518 | 1.3E-113 | 2.3E-109  | 3       |
| SEPP1   | 1.8631    | 0.909 | 0.326 | 3.5E-104 | 6.2E-100  | 3       |
| IFI27   | 1.8423    | 0.657 | 0.185 | 9.7E-70  | 1.7E-65   | 3       |
| C1QB    | 1.7300    | 1     | 0.782 | 1.3E-111 | 2.2E-107  | 3       |
| FOLR2   | 1.6111    | 0.913 | 0.264 | 4.9E-123 | 8.5E-119  | 3       |
| C1QA    | 1.5937    | 1     | 0.806 | 5.4E-109 | 9.4E-105  | 3       |
| PLTP    | 1.5914    | 0.938 | 0.284 | 2.6E-129 | 4.6E-125  | 3       |
| HAMP    | 1.5868    | 0.756 | 0.179 | 2.9E-96  | 5.1E-92   | 3       |
| SPP1    | 2.3263    | 0.826 | 0.457 | 1.1E-41  | 2.0E-37   | 4       |
| NUPR1   | 1.8168    | 0.584 | 0.168 | 4.7E-43  | 8.3E-39   | 4       |
| GPNMB   | 1.4000    | 0.842 | 0.259 | 3.3E-63  | 5.7E-59   | 4       |
| HSPB1   | 1.2162    | 0.853 | 0.651 | 7.8E-11  | 1.4E-06   | 4       |
| HSPA1A  | 1.1509    | 0.705 | 0.463 | 5.5E-13  | 9.7E-09   | 4       |
| PLIN2   | 1.0907    | 0.789 | 0.518 | 5.2E-18  | 9.1E-14   | 4       |
| RNASE1  | 1.0631    | 0.9   | 0.328 | 5.9E-64  | 1.0E-59   | 4       |
| LGALS1  | 0.9891    | 1     | 0.956 | 8.1E-32  | 1.4E-27   | 4       |
| BNIP3   | 0.9039    | 0.505 | 0.144 | 1.1E-37  | 1.9E-33   | 4       |
| CSTB    | 0.8899    | 0.989 | 0.946 | 8.3E-15  | 1.4E-10   | 4       |

|          |        |       |       |          |          |   |
|----------|--------|-------|-------|----------|----------|---|
| CLEC9A   | 1.8351 | 0.941 | 0.03  | 4.8E-237 | 8.4E-233 | 5 |
| IDO1     | 1.7890 | 0.971 | 0.192 | 4.7E-96  | 8.3E-92  | 5 |
| CPNE3    | 1.6050 | 1     | 0.423 | 2.2E-70  | 3.9E-66  | 5 |
| DNASE1L3 | 1.5903 | 0.951 | 0.328 | 4.3E-59  | 7.4E-55  | 5 |
| SNX3     | 1.4938 | 1     | 0.919 | 3.8E-58  | 6.7E-54  | 5 |
| HIST1H4C | 1.4578 | 0.784 | 0.451 | 5.3E-14  | 9.2E-10  | 5 |
| C1orf54  | 1.2818 | 0.98  | 0.524 | 4.5E-55  | 7.9E-51  | 5 |
| S100B    | 1.2652 | 0.745 | 0.391 | 1.8E-21  | 3.1E-17  | 5 |
| IRF8     | 1.2457 | 0.98  | 0.664 | 6.4E-52  | 1.1E-47  | 5 |
| LGALS2   | 1.2163 | 0.98  | 0.639 | 1.3E-41  | 2.3E-37  | 5 |
| CCR7     | 3.0469 | 0.96  | 0.05  | 5.0E-84  | 8.8E-80  | 6 |
| BIRC3    | 2.7268 | 1     | 0.532 | 1.6E-19  | 2.8E-15  | 6 |
| CCL19    | 2.6507 | 0.88  | 0.065 | 8.6E-58  | 1.5E-53  | 6 |
| MARCKSL1 | 2.5294 | 1     | 0.515 | 1.2E-19  | 2.0E-15  | 6 |
| FSCN1    | 2.4204 | 0.96  | 0.211 | 1.0E-28  | 1.8E-24  | 6 |
| CRIP1    | 2.1336 | 1     | 0.592 | 4.6E-17  | 8.0E-13  | 6 |
| EBI3     | 2.0899 | 0.8   | 0.176 | 1.5E-20  | 2.5E-16  | 6 |
| TXN      | 1.9230 | 1     | 0.829 | 6.4E-16  | 1.1E-11  | 6 |
| IDO1     | 1.8681 | 0.8   | 0.23  | 1.9E-15  | 3.4E-11  | 6 |
| IL7R     | 1.6540 | 0.92  | 0.039 | 2.0E-90  | 3.5E-86  | 6 |

**Supplemental Table 6 – related to Figure 6. Top 10 DE genes between all myeloid clusters in human tdLN scRNA-Seq**

DE was performed where every cluster was compared to all remaining cells. The top 10 DE genes for each cluster was selected and displayed in the Figure 6B and Supplementary Table 6. DE parameters: logfc.threshold = 0.4, min.pct = 0.25.

## Supplemental Figure 7

| gene      | avg_logFC | pct.1 | pct.2 | p_val   | p_val_adj | cluster |
|-----------|-----------|-------|-------|---------|-----------|---------|
| DDIT4     | 0.3954    | 0.911 | 0.765 | 1.0E-09 | 1.8E-05   | 0.1     |
| CORO1A    | 0.3129    | 1     | 0.978 | 2.3E-14 | 4.0E-10   | 0.1     |
| LIMD2     | 0.2937    | 0.975 | 0.933 | 9.0E-11 | 1.6E-06   | 0.1     |
| GYPC      | 0.2925    | 0.519 | 0.287 | 1.4E-07 | 2.4E-03   | 0.1     |
| HINT1     | 0.2829    | 1     | 0.974 | 1.0E-11 | 1.8E-07   | 0.1     |
| CRIP1     | 0.2788    | 0.924 | 0.81  | 8.2E-07 | 1.4E-02   | 0.1     |
| ACTB      | 0.2742    | 1     | 1     | 3.7E-14 | 6.4E-10   | 0.1     |
| PDLIM1    | 0.2706    | 0.424 | 0.142 | 5.3E-12 | 9.2E-08   | 0.1     |
| SRSF2     | 0.2626    | 0.981 | 0.888 | 5.7E-09 | 9.9E-05   | 0.1     |
| GSTP1     | 0.2543    | 1     | 0.993 | 8.2E-13 | 1.4E-08   | 0.1     |
| SEPT6     | 0.2464    | 0.797 | 0.634 | 3.3E-07 | 5.8E-03   | 0.1     |
| SRSF3     | 0.2443    | 0.994 | 0.929 | 1.3E-07 | 2.2E-03   | 0.1     |
| ANXA6     | 0.2413    | 0.734 | 0.593 | 1.7E-06 | 2.9E-02   | 0.1     |
| HNRNPK    | 0.2365    | 1     | 0.963 | 1.2E-08 | 2.0E-04   | 0.1     |
| CXCR4     | 0.2345    | 1     | 0.974 | 1.5E-06 | 2.5E-02   | 0.1     |
| COTL1     | 0.2301    | 1     | 0.996 | 4.9E-08 | 8.6E-04   | 0.1     |
| ACTG1     | 0.2273    | 1     | 1     | 4.8E-10 | 8.3E-06   | 0.1     |
| MYL12A    | 0.2230    | 1     | 0.996 | 5.5E-09 | 9.6E-05   | 0.1     |
| HLA-DOB   | 0.2205    | 0.449 | 0.235 | 7.5E-07 | 1.3E-02   | 0.1     |
| SNX3      | 0.2198    | 0.981 | 0.937 | 2.1E-06 | 3.7E-02   | 0.1     |
| PRELID1   | 0.2186    | 1     | 0.963 | 2.0E-06 | 3.5E-02   | 0.1     |
| CAP1      | 0.2132    | 0.994 | 0.948 | 1.0E-06 | 1.8E-02   | 0.1     |
| RPSA      | 0.1942    | 1     | 1     | 1.5E-12 | 2.6E-08   | 0.1     |
| SYTL1     | 0.1874    | 0.399 | 0.183 | 3.4E-07 | 6.0E-03   | 0.1     |
| NPM1      | 0.1868    | 1     | 1     | 7.3E-07 | 1.3E-02   | 0.1     |
| GDI2      | 0.1866    | 0.981 | 0.966 | 2.8E-07 | 4.9E-03   | 0.1     |
| PFN1      | 0.1831    | 1     | 1     | 5.8E-10 | 1.0E-05   | 0.1     |
| LSP1      | 0.1711    | 1     | 0.993 | 8.2E-07 | 1.4E-02   | 0.1     |
| GAPDH     | 0.1674    | 1     | 1     | 4.5E-07 | 7.8E-03   | 0.1     |
| RPL10A    | 0.1618    | 1     | 1     | 1.9E-12 | 3.2E-08   | 0.1     |
| HNRNPA2B1 | 0.1564    | 1     | 0.985 | 1.3E-06 | 2.3E-02   | 0.1     |
| RPL8      | 0.1562    | 1     | 1     | 5.1E-13 | 8.8E-09   | 0.1     |
| RPL5      | 0.1560    | 1     | 1     | 7.9E-10 | 1.4E-05   | 0.1     |
| RPS17     | 0.1513    | 1     | 1     | 3.1E-11 | 5.3E-07   | 0.1     |
| C14orf2   | 0.1467    | 1     | 0.974 | 2.7E-06 | 4.6E-02   | 0.1     |
| RPS5      | 0.1448    | 1     | 1     | 2.7E-10 | 4.7E-06   | 0.1     |
| RPS23     | 0.1334    | 1     | 1     | 4.9E-10 | 8.5E-06   | 0.1     |
| NACA      | 0.1310    | 1     | 1     | 2.8E-06 | 4.8E-02   | 0.1     |
| RPS18     | 0.1261    | 1     | 1     | 1.8E-09 | 3.2E-05   | 0.1     |
| RPS3      | 0.1243    | 1     | 1     | 3.5E-10 | 6.2E-06   | 0.1     |
| RPS3A     | 0.1234    | 1     | 1     | 3.4E-09 | 5.9E-05   | 0.1     |
| RPL9      | 0.1215    | 1     | 1     | 1.6E-07 | 2.7E-03   | 0.1     |
| RPL18A    | 0.1208    | 1     | 1     | 7.0E-10 | 1.2E-05   | 0.1     |
| RPL18     | 0.1186    | 1     | 1     | 5.7E-08 | 9.9E-04   | 0.1     |
| RPS7      | 0.1179    | 1     | 1     | 3.7E-08 | 6.4E-04   | 0.1     |
| RPS13     | 0.1173    | 1     | 1     | 1.6E-08 | 2.8E-04   | 0.1     |
| RPL7A     | 0.1146    | 1     | 1     | 1.2E-06 | 2.2E-02   | 0.1     |
| RPL19     | 0.1110    | 1     | 1     | 1.1E-07 | 1.9E-03   | 0.1     |
| RPS2      | 0.1101    | 1     | 1     | 1.7E-06 | 2.9E-02   | 0.1     |
| RPS6      | 0.1075    | 1     | 1     | 6.0E-08 | 1.0E-03   | 0.1     |

|          |        |       |       |         |         |     |
|----------|--------|-------|-------|---------|---------|-----|
| RPL13A   | 0.1048 | 1     | 1     | 1.1E-06 | 1.9E-02 | 0.1 |
| RPS11    | 0.1041 | 1     | 1     | 2.2E-06 | 3.8E-02 | 0.1 |
| RPS15    | 0.1004 | 1     | 1     | 5.7E-07 | 9.9E-03 | 0.1 |
| DNASE1L3 | 1.5074 | 0.752 | 0.346 | 1.6E-22 | 2.8E-18 | 0.2 |
| CCL4L2   | 1.2087 | 0.664 | 0.329 | 1.2E-14 | 2.2E-10 | 0.2 |
| C1QA     | 1.0690 | 0.861 | 0.702 | 3.1E-16 | 5.4E-12 | 0.2 |
| HLA-DQB2 | 1.0322 | 0.628 | 0.135 | 5.1E-27 | 9.0E-23 | 0.2 |
| CD1E     | 0.9392 | 0.861 | 0.529 | 2.7E-21 | 4.7E-17 | 0.2 |
| CCL3L3   | 0.9381 | 0.708 | 0.37  | 3.4E-13 | 6.0E-09 | 0.2 |
| C1QB     | 0.8877 | 0.839 | 0.647 | 1.4E-12 | 2.4E-08 | 0.2 |
| C1QC     | 0.8721 | 0.642 | 0.46  | 9.2E-08 | 1.6E-03 | 0.2 |
| CCL4     | 0.7649 | 0.562 | 0.239 | 1.4E-11 | 2.4E-07 | 0.2 |
| MT2A     | 0.6880 | 0.81  | 0.564 | 7.4E-10 | 1.3E-05 | 0.2 |
| CCL3     | 0.6767 | 0.723 | 0.554 | 9.9E-07 | 1.7E-02 | 0.2 |
| S100B    | 0.6617 | 0.562 | 0.27  | 9.4E-10 | 1.6E-05 | 0.2 |
| CXCL8    | 0.6254 | 0.62  | 0.384 | 1.5E-06 | 2.5E-02 | 0.2 |
| IDO1     | 0.6155 | 0.46  | 0.17  | 9.5E-11 | 1.7E-06 | 0.2 |
| STAT1    | 0.5936 | 0.715 | 0.346 | 1.1E-16 | 1.9E-12 | 0.2 |
| ACP5     | 0.5706 | 0.759 | 0.256 | 1.0E-24 | 1.8E-20 | 0.2 |
| GBP1     | 0.5565 | 0.708 | 0.408 | 1.1E-11 | 1.8E-07 | 0.2 |
| TMEM176B | 0.5429 | 0.467 | 0.235 | 3.3E-08 | 5.8E-04 | 0.2 |
| IFITM3   | 0.5387 | 0.978 | 0.772 | 4.2E-13 | 7.3E-09 | 0.2 |
| CD1B     | 0.5358 | 0.423 | 0.128 | 1.5E-12 | 2.7E-08 | 0.2 |
| FAM26F   | 0.5056 | 0.978 | 0.927 | 9.7E-17 | 1.7E-12 | 0.2 |
| CD68     | 0.4581 | 0.927 | 0.779 | 2.7E-13 | 4.7E-09 | 0.2 |
| PLA2G7   | 0.4254 | 0.635 | 0.356 | 3.8E-09 | 6.6E-05 | 0.2 |
| TUBB     | 0.4107 | 0.876 | 0.772 | 4.2E-07 | 7.3E-03 | 0.2 |
| LGALS2   | 0.4084 | 1     | 0.955 | 1.6E-13 | 2.9E-09 | 0.2 |
| GSN      | 0.4023 | 0.993 | 0.979 | 4.8E-13 | 8.4E-09 | 0.2 |
| HLA-DQA2 | 0.3966 | 0.277 | 0.035 | 6.5E-14 | 1.1E-09 | 0.2 |
| CLEC10A  | 0.3903 | 0.978 | 0.896 | 1.8E-09 | 3.2E-05 | 0.2 |
| EGR2     | 0.3857 | 0.409 | 0.125 | 2.8E-11 | 4.9E-07 | 0.2 |
| SERPINF1 | 0.3671 | 0.759 | 0.433 | 7.2E-11 | 1.3E-06 | 0.2 |
| RGS10    | 0.3538 | 0.985 | 0.948 | 2.6E-13 | 4.5E-09 | 0.2 |
| PLEKHO1  | 0.3524 | 0.876 | 0.678 | 4.2E-08 | 7.3E-04 | 0.2 |
| PTMS     | 0.3417 | 0.73  | 0.429 | 3.5E-10 | 6.1E-06 | 0.2 |
| C1orf54  | 0.3397 | 0.526 | 0.26  | 5.6E-09 | 9.8E-05 | 0.2 |
| NAP1L1   | 0.3375 | 1     | 0.99  | 2.0E-14 | 3.4E-10 | 0.2 |
| HCAR2    | 0.3337 | 0.474 | 0.173 | 1.8E-10 | 3.1E-06 | 0.2 |
| MMP9     | 0.3315 | 0.255 | 0.076 | 3.4E-07 | 5.9E-03 | 0.2 |
| FTL      | 0.3141 | 1     | 1     | 1.6E-07 | 2.7E-03 | 0.2 |
| HLA-DQB1 | 0.3001 | 1     | 1     | 9.7E-17 | 1.7E-12 | 0.2 |
| NPC2     | 0.2953 | 0.993 | 0.983 | 2.6E-09 | 4.5E-05 | 0.2 |
| HLA-DPB1 | 0.2845 | 1     | 1     | 2.3E-15 | 4.0E-11 | 0.2 |
| ENPP2    | 0.2837 | 0.584 | 0.263 | 3.3E-10 | 5.8E-06 | 0.2 |
| ITM2B    | 0.2813 | 1     | 1     | 1.3E-09 | 2.3E-05 | 0.2 |
| FGL2     | 0.2746 | 0.985 | 0.99  | 1.1E-06 | 1.9E-02 | 0.2 |
| SLAMF7   | 0.2738 | 0.555 | 0.263 | 8.7E-09 | 1.5E-04 | 0.2 |
| HLA-DRB5 | 0.2732 | 1     | 1     | 1.0E-20 | 1.8E-16 | 0.2 |
| SLAMF8   | 0.2723 | 0.701 | 0.405 | 2.9E-08 | 5.1E-04 | 0.2 |
| CD63     | 0.2691 | 0.985 | 0.962 | 3.2E-07 | 5.6E-03 | 0.2 |
| LGALS3BP | 0.2657 | 0.474 | 0.173 | 5.1E-11 | 8.9E-07 | 0.2 |
| NINJ1    | 0.2656 | 0.606 | 0.346 | 1.7E-06 | 2.9E-02 | 0.2 |

|          |        |       |       |         |         |     |
|----------|--------|-------|-------|---------|---------|-----|
| PNRC1    | 0.2606 | 0.964 | 0.952 | 5.3E-07 | 9.3E-03 | 0.2 |
| PILRA    | 0.2601 | 0.788 | 0.564 | 3.4E-07 | 5.9E-03 | 0.2 |
| TMEM176A | 0.2544 | 0.372 | 0.135 | 2.2E-08 | 3.9E-04 | 0.2 |
| GBP4     | 0.2505 | 0.613 | 0.367 | 1.6E-06 | 2.9E-02 | 0.2 |
| FRMD4B   | 0.2484 | 0.613 | 0.325 | 6.7E-08 | 1.2E-03 | 0.2 |
| HLA-DQA1 | 0.2368 | 1     | 1     | 4.6E-12 | 8.0E-08 | 0.2 |
| HLA-DRA  | 0.2352 | 1     | 1     | 1.9E-20 | 3.3E-16 | 0.2 |
| CST3     | 0.2165 | 1     | 1     | 2.2E-09 | 3.9E-05 | 0.2 |
| PVRL2    | 0.2145 | 0.584 | 0.336 | 1.0E-06 | 1.8E-02 | 0.2 |
| GPR34    | 0.2130 | 0.409 | 0.149 | 1.2E-08 | 2.1E-04 | 0.2 |
| LPAR6    | 0.2120 | 0.489 | 0.225 | 3.4E-07 | 5.9E-03 | 0.2 |
| HLA-DRB1 | 0.2115 | 1     | 1     | 7.9E-14 | 1.4E-09 | 0.2 |
| HLA-DPA1 | 0.2097 | 1     | 1     | 2.6E-12 | 4.5E-08 | 0.2 |
| HLA-E    | 0.2032 | 0.985 | 0.99  | 2.6E-06 | 4.5E-02 | 0.2 |
| CD74     | 0.2006 | 1     | 1     | 7.8E-20 | 1.4E-15 | 0.2 |
| CPVL     | 0.1980 | 1     | 0.993 | 2.3E-06 | 4.0E-02 | 0.2 |
| TYROBP   | 0.1941 | 1     | 0.997 | 2.4E-06 | 4.3E-02 | 0.2 |
| TPT1     | 0.1813 | 1     | 1     | 1.6E-11 | 2.9E-07 | 0.2 |
| B2M      | 0.1775 | 1     | 1     | 5.2E-09 | 9.1E-05 | 0.2 |
| IL6ST    | 0.1770 | 0.38  | 0.138 | 6.9E-08 | 1.2E-03 | 0.2 |
| HLA-DMB  | 0.1709 | 0.993 | 1     | 1.5E-06 | 2.6E-02 | 0.2 |
| SERPING1 | 0.1649 | 0.314 | 0.114 | 1.2E-06 | 2.2E-02 | 0.2 |
| ELAVL4   | 0.1300 | 0.27  | 0.083 | 4.6E-07 | 7.9E-03 | 0.2 |
| FCGR1B   | 0.1282 | 0.328 | 0.121 | 2.3E-06 | 4.0E-02 | 0.2 |
| FCN1     | 1.1242 | 0.679 | 0.342 | 4.4E-18 | 7.7E-14 | 0.3 |
| S100A9   | 1.0495 | 0.779 | 0.559 | 1.2E-14 | 2.0E-10 | 0.3 |
| FCER1A   | 0.9011 | 0.924 | 0.803 | 2.5E-13 | 4.4E-09 | 0.3 |
| S100A4   | 0.8120 | 0.992 | 0.915 | 3.7E-24 | 6.5E-20 | 0.3 |
| S100A8   | 0.7891 | 0.489 | 0.298 | 5.1E-07 | 8.9E-03 | 0.3 |
| CD14     | 0.6979 | 0.893 | 0.631 | 1.2E-17 | 2.1E-13 | 0.3 |
| TSPO     | 0.6136 | 0.977 | 0.722 | 7.6E-23 | 1.3E-18 | 0.3 |
| HBEGF    | 0.5721 | 0.763 | 0.492 | 3.4E-12 | 6.0E-08 | 0.3 |
| VCAN     | 0.5464 | 0.412 | 0.071 | 2.5E-19 | 4.3E-15 | 0.3 |
| S100A6   | 0.5026 | 1     | 0.98  | 2.0E-16 | 3.5E-12 | 0.3 |
| FCGR2A   | 0.3600 | 0.679 | 0.529 | 1.2E-08 | 2.1E-04 | 0.3 |
| SAMSN1   | 0.3526 | 0.779 | 0.603 | 2.3E-07 | 3.9E-03 | 0.3 |
| RHOB     | 0.3499 | 0.595 | 0.414 | 2.1E-06 | 3.6E-02 | 0.3 |
| ID3      | 0.3399 | 0.298 | 0.085 | 1.0E-08 | 1.8E-04 | 0.3 |
| CAPG     | 0.3327 | 0.878 | 0.851 | 2.0E-07 | 3.4E-03 | 0.3 |
| NUP214   | 0.3248 | 0.481 | 0.186 | 8.7E-12 | 1.5E-07 | 0.3 |
| TGIF1    | 0.3215 | 0.656 | 0.481 | 2.7E-06 | 4.6E-02 | 0.3 |
| NAMPT    | 0.3153 | 0.954 | 0.888 | 3.1E-08 | 5.4E-04 | 0.3 |
| SERPINA1 | 0.3059 | 0.962 | 0.908 | 1.3E-08 | 2.3E-04 | 0.3 |
| CD1D     | 0.3042 | 0.763 | 0.624 | 1.6E-07 | 2.7E-03 | 0.3 |
| FCGRT    | 0.2945 | 0.992 | 0.973 | 5.8E-10 | 1.0E-05 | 0.3 |
| NEAT1    | 0.2937 | 1     | 0.993 | 8.3E-09 | 1.4E-04 | 0.3 |
| CTSS     | 0.2906 | 1     | 0.997 | 1.9E-10 | 3.3E-06 | 0.3 |
| NPC2     | 0.2903 | 0.985 | 0.986 | 2.8E-09 | 4.8E-05 | 0.3 |
| LY96     | 0.2894 | 0.779 | 0.634 | 2.5E-07 | 4.4E-03 | 0.3 |
| HNMT     | 0.2870 | 0.55  | 0.305 | 5.1E-08 | 9.0E-04 | 0.3 |
| TKT      | 0.2779 | 0.931 | 0.939 | 1.8E-06 | 3.1E-02 | 0.3 |
| F13A1    | 0.2660 | 0.344 | 0.125 | 1.3E-08 | 2.2E-04 | 0.3 |
| SLC11A1  | 0.2518 | 0.328 | 0.122 | 3.3E-08 | 5.7E-04 | 0.3 |

|         |        |       |       |         |         |     |
|---------|--------|-------|-------|---------|---------|-----|
| MT-ND3  | 0.2388 | 0.992 | 1     | 1.2E-07 | 2.2E-03 | 0.3 |
| PSAP    | 0.2281 | 1     | 0.997 | 5.9E-07 | 1.0E-02 | 0.3 |
| FCER1G  | 0.2226 | 1     | 0.997 | 3.8E-08 | 6.7E-04 | 0.3 |
| LAPTM5  | 0.2193 | 0.992 | 0.993 | 1.2E-08 | 2.0E-04 | 0.3 |
| MT-ND2  | 0.2174 | 1     | 0.997 | 2.0E-08 | 3.6E-04 | 0.3 |
| SNCA    | 0.2147 | 0.336 | 0.105 | 1.2E-09 | 2.1E-05 | 0.3 |
| CD2     | 0.2134 | 0.412 | 0.2   | 5.3E-07 | 9.2E-03 | 0.3 |
| CD300E  | 0.2122 | 0.305 | 0.125 | 6.4E-07 | 1.1E-02 | 0.3 |
| TYROBP  | 0.2107 | 1     | 0.997 | 5.8E-10 | 1.0E-05 | 0.3 |
| S100A12 | 0.2042 | 0.252 | 0.054 | 2.1E-09 | 3.6E-05 | 0.3 |
| AIF1    | 0.2010 | 0.992 | 1     | 1.7E-06 | 3.0E-02 | 0.3 |
| FTL     | 0.1999 | 1     | 1     | 6.9E-10 | 1.2E-05 | 0.3 |
| MT-CO3  | 0.1877 | 0.992 | 1     | 2.4E-06 | 4.1E-02 | 0.3 |
| MT-ND1  | 0.1858 | 0.992 | 0.997 | 2.1E-06 | 3.6E-02 | 0.3 |
| H3F3A   | 0.1427 | 1     | 1     | 6.1E-08 | 1.1E-03 | 0.3 |

**Supplemental Table 7 – related to Figure 6. DE genes between BDCA-1+ cDC2 clusters 0.1 – 0.3**

DE was performed where BDCA-1+ cDC2 clusters 0.1, 0.2 and 0.3 were compared to one another. All DE genes above the logFC threshold are displayed in Figure 6D as heatmap and in Supplementary Table 7. DE parameters: logfc.threshold = 0.1, min.pct = 0.25.

## Materials and Methods

### Human Tumor Samples

The human head and neck tumor set consisted of a total of 32 tumors removed from the head and neck region, agnostic to location. The anti-PD-1 responder/non-responder melanoma tumor set was published previously (Barry et al., 2018). All patients consented for tissue collection under a UCSF IRB approved protocol (UCSF IRB# 13-12246 and 14-15342). Samples were obtained after surgical excision with biopsies taken by the Pathology Department to confirm the presence of tumor cells. Patients were selected without regard to prior treatment. Freshly resected samples were placed in ice-cold PBS or Leibovitz's L-15 medium in a 50 mL conical tube and immediately transported to the laboratory for evaluation. Patient samples were coded and flow analysis was scored by separate individuals prior to data agglomeration. All samples were processed and analyzed by flow cytometry, but only those with at least 1,000 live CD45<sup>+</sup> cell events were included in the analysis.

### Mice

All mice were treated in accordance with the regulatory standards of the National Institutes of Health and American Association of Laboratory Animal Care and were approved by the UCSF Institution of Animal Care and Use Committee. The following mice were purchased for acute use or maintained under specific pathogen-free conditions at the University of California, San Francisco Animal Barrier Facility. We attempted to use *Irf4<sup>fllox/fllox</sup>;CD11c-Cre* but discovered independent breeding cages were producing germline *Irf4* globally deficient pups, complicating our findings (data not shown).

## Method Details

### Tumor cell lines, tumor cell injections and tumor growth experiments

B16-F10 (ATCC, CRL-6475) was purchased. B16-ChOVA (B16<sup>ChOVA</sup>), a derivative of B16-F10, was created through transduction of B16-F10 with an mCherry-OVA (ChOVA) fusion construct identical to that used in previous studies in our lab

(Engelhardt et al., 2012; Roberts et al., 2016). B78<sup>ChOVA</sup>, derived from the parental B78 subline of B16, was generated in our laboratory and described previously (Broz et al., 2014). B16-ZsGreen (B16<sup>ZsGr</sup>) was previously generated in our laboratory as described (Headley et al., 2016). B16<sup>GM-CSF</sup> (GVAX) (Dranoff et al., 1993) were acquired from the laboratory of Dr. Lawrence Fong at UC San Francisco. Adherent cell lines were cultured at 37°C in 5% CO<sub>2</sub> in DMEM (Invitrogen), 10% FCS (Benchmark), Pen/Strep/Glut (Invitrogen).

For tumor cell injection, adherent tumor cells were lifted using 0.05% Trypsin-EDTA (Thermo Fisher Scientific) and washed 3X with DPBS (Thermo Fisher Scientific).  $1.0 \times 10^5$  –  $2.5 \times 10^5$  tumor cells were resuspended in DPBS and mixed 1:1 with Matrigel GFR (Corning) for a final injection volume of 50  $\mu$ L. Mice anesthetized with isoflurane (Henry Schein) were shaved on their flank and injected subcutaneously either unilaterally or bilaterally depending on the experimental setup.

For tumor measurements, tumors were typically measured 3 times per week using electronic calipers. Tumor volume was calculated through the formula  $V = 0.5(w^2 \times l)$ . Mice were removed from the study and euthanized when tumors exceeded a volume of 1000 mm<sup>3</sup>.

### Single Cell RNA Sequencing (scRNA-Seq)

For mouse scRNA-seq, live CD90.2<sup>-</sup> B220<sup>-</sup> Ly6G<sup>-</sup> NK1.1<sup>-</sup>CD11b<sup>+</sup> and/or CD11c<sup>+</sup> cells were sorted from inguinal and axillary LN with a BD FACSAria Fusion. For human scRNA-seq, live CD3<sup>-</sup>CD19/20<sup>-</sup>CD56<sup>-</sup> cells were sorted from a melanoma-draining LN on a BD FACSAria Fusion. After sorting, cells were pelleted and resuspended at  $1 \times 10^3$  cells/ $\mu$ l in 0.04%BSA/PBA and loaded onto the Chromium Controller (10X Genomics). Samples were processed for single-cell encapsulation and cDNA library generation using the Chromium Single Cell 3' v2 Reagent Kits (10X Genomics). The library was subsequently sequenced on an Illumina HiSeq 4000 (Illumina).

### Single Cell Data Processing

Sequencing data was processed using 10X Genomics Cell Ranger V1.2 pipeline. The Cell Ranger subroutine *mckfastq* converted raw, Illumina bcl files to fastqs which were



then passed to Cell Ranger's *count*, which aligned all reads using the aligner STAR (Dobin et al., 2013) against UCSC mm10 or GRCh38 genomes for mouse and human cells, respectively. After filtering reads with redundant unique molecular identifiers (UMI), *count* generated a final gene-cellular barcode matrix. Both *mkfastq* and *count* were run with default parameters.

### Cellular Identification and Clustering

For each sample, the gene - barcode matrix was passed to the R (v. 3.4.3) software package Seurat (Satija et al., 2015) (<http://satijalab.org/seurat>) (v2.3.0) for all downstream analyses. We then filtered on cells that expressed a minimum of 200 genes and required that all genes be expressed in at least 3 cells. We also removed cells that contained > 5% reads associated with cell cycle genes (Kowalczyk et al., 2015; Macosko et al., 2015). Count data was then log2 transformed and scaled using each cell's proportion of cell cycle genes as a nuisance factor (implemented in Seurat's *ScaleData* function) to correct for any remaining cell cycle effect in downstream clustering and differential expression analyses. For each sample, principal component (PC) analysis was performed on a set of highly variable genes defined by Seurat's *FindVariableGenes* function. Genes associated with the resulting PCs (chosen by visual inspection of scree plots) were then used for graph-based cluster identification and subsequent dimensionality reduction using t-distributed stochastic neighbor embedding (tSNE). Cluster-based marker identification and differential expression were performed using Seurat's *FindAllMarkers* for all between-cluster comparisons.

### ImmGen Signature Generation

To generate *a priori* signatures for the myeloid cell types that we expected to find in the mouse tdLN sample, we downloaded microarray based transcriptional profiles from the Immunological Genome Project data Phase 1 (Heng and Painter, 2008) (GSE15907). See **Supplementary Table 1** for the specific samples used.

For each ImmGen population, we performed DE analysis comparing samples from the population of interest to the aggregate of the remaining 6 groups using the R package *limma* (Ritchie et al., 2015). We ordered the top 20 genes with the smallest

FDR values (Benjamini and Hochberg, 1995) by fold change (excluding any genes that were downregulated in the group of interest) and then cross referenced the resulting list with the single cell expression matrix from each sample. This left genes that were both highly differentially expressed in the IMMGEN profiles and expressed in our single cell data sets of interest. The top 10 genes (or fewer if less than 10 genes remained) by fold change were then median normalized and aggregated to create a single “signature gene” for each cell type. These signature genes were 0-1 scaled and plotted in the context of the *t*-SNE dimensionality reduction to show cellular location.

### Sequencing Sample Aggregation

In order to generate pairwise aggregations between samples and control for potential batch effects, we used Seurat’s Canonical Correlation Analysis (CCA) functionality. All post-filtered cells from each of the single sample analyses were used in the aggregate. CCA was performed on the union of the 2000 genes with highest dispersions from each dataset. The number of canonical correlation vectors (CCVs) used in downstream clustering and *t*-SNE analyses was chosen by visual inspection of heatmaps of genes associated with those top CCVs. Results were robust to moderate changes in this final number of CCVs.

### Mouse Tissue Digestion and Flow Staining

Tumor and LN tissues were harvested and enzymatically digested with 0.2 mg/ml DNase I (Sigma-Aldrich), 100 U/ml Collagenase I (Worthington Biochemical), and 500 U/ml Collagenase Type IV (Worthington Biochemical) for 30-45 minutes at 37 °C. TdLN included inguinal and axillary LN. Tumor samples were subjected to consistent agitation during this time and LN samples were rapidly pipetted at the half-point time. Samples were filtered to generate a single-cell suspension and washed with stain media (PBS, 2% FCS). For bone marrow cells, mouse femurs and tibias were flushed with stain media and subsequently underwent red blood cell lysis.

Cells harvested from these tissues or *in vitro* culture were washed with PBS and stained with Zombie NIR fixable viability dye (BioLegend) for 30 minutes at 4°C to distinguish live and dead cells. Cells were then washed with stain media and non-

specific binding was blocked with anti-CD16/32 (BioXCell), and 2% rat serum (Invitrogen) and 2% Armenian hamster serum (Innovative Research). Cell surface proteins were then stained on ice for 30 minutes. Cells were washed again and re-suspended with stain media prior to collection and analysis on a BD Fortessa or LSR-II flow cytometer. When applicable, black latex beads were added to the sample for quantification of absolute cell number. For intracellular stains, cells were fixed and permeabilized with the FoxP3/Transcription Factor Staining Buffer Set (Thermo Fisher Scientific) after surface marker staining. Intracellular antibodies were stained in permeabilization buffer with 2% rat serum for at least 30 minutes at room temperature.

### Human Tissue Digestion and Flow Staining

Tumor or LN tissue was thoroughly chopped with surgical scissors and transferred to GentleMACs C Tubes (Miltenyi Biotec) containing 20 uL/mL Liberase TL (5 mg/ml, Roche) and 50 U/ml DNase I (Roche) in RPMI 1640 per 0.3 g tissue. GentleMACs C Tubes were then installed onto the GentleMACs Octo Dissociator (Miltenyi Biotec) and incubated according to the manufacturer's instructions. Samples were then quenched with 10 mL of sort buffer (PBS/2% FCS/2mM EDTA), filtered through 100 um filters and spun down. Red blood cell lysis was performed with 175 mM ammonium chloride.

Cells were then incubated with Human FcX (Biolegend) to prevent non-specific antibody binding. Cells were then washed in DPBS and incubated with Zombie Aqua Fixable Viability Dye (Biolegend). Following viability dye, cells were washed with sort buffer and incubated with cell surface antibodies for 30 minutes on ice and subsequently fixed in either Fixation Buffer (BD Biosciences) or in Foxp3/Transcription Factor Staining Buffer Set (ThermoFisher Scientific) if intracellular staining was required.

### APC-T cell *In Vitro* Co-Culture Assays

APC populations were double-sorted (yield followed by purity) from tdLN using a BD FACSAria Fusion and co-cultured with  $2 \times 10^4$  isolated eFluor670-labeled OT-II T cells at a 1:5 ratio in complete RPMI (Pen/Strep, NEAA, NaPyr, 2-ME, 10% FCS) in 96-well V-

bottom plates. Cells were harvested for analysis 3 days later. OVA peptide 323-339 (GenScript) was added to wells at 1  $\mu\text{g/ml}$  as a positive control.

### Mouse T cell Isolation and *In Vivo* Adoptive T Cell Transfer

Inguinal, axillary, brachial, superficial cervical and mesenteric LN were isolated from CD45.1<sup>+</sup> OT-II mice. LN were smashed through 100  $\mu\text{m}$  filters and subsequently spun down and counted. CD4<sup>+</sup> T cells were then isolated using EasySep CD4 negative-selection kits (STEMCELL Technologies).

$1 \times 10^5$  isolated CD45.1<sup>+</sup> CD4<sup>+</sup> OT-II T cells were either transferred immediately in cases of PMA/Ionomycin restimulation experiments or labeled with Cell Proliferation Dye eFluor670 (Thermo Fisher Scientific) and  $1.0\text{-}5.0 \times 10^5$  cells were adoptively transferred to CD45.2<sup>+</sup> mice. LN were harvested for proliferation analysis at day 3 post-transfer and for PMA/ionomycin re-stimulation at day 7 post-transfer. *XCR1<sup>DTR</sup>* and *Cx3cr1<sup>iDTR</sup>* mice were treated with 500 ng of DT every other day beginning the day prior to OT-II transfer through the experimental end point. *Foxp3<sup>DTR</sup>* mice were injected with DT for two days prior to OT-II transfer and then the day following OT-II transfer.

### T Cell Cytokine Analysis

For cytokine analysis of endogenous or adoptively transferred T cells, cells from either LN or tumors were used for re-stimulation. Single cell suspensions were incubated with 50 ng/ml PMA (Sigma-Aldrich), 500 ng/ml ionomycin (Thermo Fisher Scientific), 3  $\mu\text{g/ml}$  brefeldin A (Cayman Chemical Company), and 2  $\mu\text{M}$  monensin (Thermo Fisher Scientific) for 5-6 hours in complete RPMI and stained for surface and intracellular proteins using the Foxp3/Transcription Factor Staining Buffer Set (ThermoFisher Scientific).

### *In Vivo* Treatments

For diphtheria toxin (DT), while treatment schedules varied depending upon mouse genetic strain or type of experiment, mice received 500 ng boluses of un-nicked DT (List Biologics, 150) intraperitoneally. *Foxp3<sup>DTR</sup>*, *XCR1<sup>DTR</sup>* and *Cx3cr1<sup>iDTR</sup>* mice were typically injected on days 9, 10 and 12 followed by flow cytometric analysis at day 14.

For comparisons of CD4<sup>+</sup> T<sub>conv</sub> priming between steady-state, tumor-bearing and influenza-infected conditions, mice were injected subcutaneously with either 20 µg of endotoxin-free ovalbumin (Invivogen) in 50 µl of PBS or 2.0x10<sup>5</sup> B16ChOVA. Mice receiving influenza were infected intranasally with 1x10<sup>5</sup> PFU of X31-OT-II (Thomas et al., 2006), prepared as previously described (GeurtsvanKessel et al., 2008). CD45.1<sup>+</sup> OT-II<sup>+</sup> CD4<sup>+</sup> T cells were transferred intravenously 2 days after ovalbumin and X31-OT-II treatment and 14 days after B16<sup>ChOVA</sup> injection.

To assess CD4/CD8 T cell dependency for tumor rejection following T<sub>reg</sub> depletion or GVAX/anti-CTLA-4 treatment, mice were injected with 250 µg of isotype (Clone: LTF-2, BioXCell), anti-CD4 (Clone: GK1.5, BioXCell) or anti-CD8a (Clone: 2.43, BioXCell) was injected at days 10, 13 and 16 post-tumor injection for *Foxp3*<sup>DTR</sup> and days 4, 7 and 10 for GVAX/anti-CTLA-4 treatment.

To assess the requirement of T cell LN egress, control or *Foxp3*<sup>DTR</sup> mice were treated with 500 ng of DT on days 9, 10 and 12 post-tumor injection and with 200 µg FTY720 (Cayman Chemicals) every day beginning on day 8 post-tumor injection through the end of the experiment.

For Fc-modified anti-CTLA-4 experiments, mice were injected with 2x10<sup>5</sup> B16<sup>ZsGreen</sup> cells. On days 7, 9, 10, 11 and 13 post-tumor injection, mice received 250 µg of mouse IgG2c isotype, anti-CTLA-4 IgG2c (modified clone 9D9, Bristol-Myers-Squibb), mouse IgG1 isotype or anti-CTLA-4 IgG1 (modified clone 9D9, Bristol-Myers-Squibb).

For GVAX/anti-CTLA-4 experiments, mice were injected with either 1x10<sup>5</sup> (tumor growth) or 2x10<sup>5</sup> B16-F10 (cellular analysis). On days 3, 6 and 9 post-tumor injection, mice were injected subcutaneously on their contralateral flank with either PBS or 1x10<sup>6</sup> 50 Gy-irradiated GVAX cells and received either 250 µg anti-CTLA-4 (9H10, BioXCell) or Syrian hamster IgG isotype (BioXcell) on day 3, and 100 µg of antibody on days 6 and 9.

#### Statistical analysis and experimental design

Unless specifically noted, data displayed is from a representative experiment of ≥ 2 independent experiments. Experimental group assignment was determined by genotype

or, if all wild-type mice, by random designation. Error bars represent mean  $\pm$  S.E.M. calculated using Prism unless otherwise noted. Statistical analyses were performed using GraphPad Prism software. For pairwise comparisons, unpaired T tests were used unless otherwise noted. For statistical measures between more than two groups, one-way ANOVA would be performed unless otherwise noted. Comparisons found to be nonsignificant are not shown. Investigators were not blinded to group assignment during experimental procedures or analysis.

## **Data and Software Availability**

### Data Resources

The accession number for the expression matrix for the single-cell RNA-sequencing reported in this paper is GEO: XXXXXXXXX

## KEY RESOURCES TABLE

| REAGENT or RESOURCE                                  | SOURCE         | IDENTIFIER     |
|------------------------------------------------------|----------------|----------------|
| <b>Antibodies</b>                                    |                |                |
| anti-mouse CD11c BV650 (clone N418)                  | Biologend      | 117339         |
| anti-mouse/human CD11b BV605 (clone M1/70)           | Biologend      | 101257         |
| anti-mouse CD103 BV421 (clone 2E7)                   | Biologend      | 121421         |
| anti-mouse Ly-6C BV711 (clone HK1.4)                 | Biologend      | 128037         |
| anti-mouse CD90.2 BV785 (clone 30-H12)               | Biologend      | 105331         |
| anti-mouse/human CD45R/B220 BV785 (clone RA3-6B2)    | Biologend      | 103246         |
| anti-mouse Ly-6G BV785 (clone IA8)                   | Biologend      | 127645         |
| anti-mouse Siglec F BV786 (clone E50-2440)           | BD Biosciences | 740956         |
| anti-mouse NK1.1 BV785 (clone PK136)                 | Biologend      | 108749         |
| anti-mouse CD24 PE/Cy7 (clone M1/69)                 | Biologend      | 101822         |
| anti-mouse MHC-II AF700 (clone M5/114.15.2)          | Biologend      | 107622         |
| anti-mouse CD301b PE or APC (clone URA-1)            | Biologend      | 146814, 146803 |
| anti-mouse CD8a PerCP/Cy5.5 or PE/Cy7 (clone 53-6.7) | Biologend      | 100734, 100722 |
| anti-mouse F4/80 FITC (clone BM8)                    | Biologend      | 123107         |
| anti-mouse CD45 PerCP/Cy5.5 (clone A20)              | Biologend      | 110727         |
| anti-mouse CD197/CCR7 PE                             | Biologend      | 120105         |
| anti-mouse CD9 AF647 (clone MZ3)                     | Biologend      | 124809         |
| anti-mouse CD135/FLT3 PE (clone A2F10)               | Biologend      | 135305         |
| anti-mouse CD172a/SIRPA PE or AF488 (clone P84)      | Biologend      | 144011, 144023 |
| anti-mouse CD14 PE (clone Sa14-2)                    | Biologend      | 123309         |
| anti-mouse CD16/32 PE (clone 93)                     | Biologend      | 101307         |
| anti-mouse CD200R PE (clone OX110)                   | Biologend      | 123907         |
| anti-mouse CD206 PE (clone C068C2)                   | Biologend      | 141705         |
| anti-mouse B7-H1 PE (PD-L1/CD274) (clone 10F.9G2)    | Biologend      | 124307         |
| anti-mouse B7-H2 PE (ICOS-L/CD275) (clone HK5.3)     | Biologend      | 107405         |
| anti-mouse B7-H3 PE (CD276) (clone RTAA15)           | Biologend      | 123507         |
| anti-mouse B7-DC (PD-L2/CD273) PE (clone TY25)       | Biologend      | 107205         |
| anti-mouse CD85K (LILRB4) PE                         | Biologend      | 144903         |
| anti-mouse CD4 BUV395 (clone GK1.5)                  | BD Biosciences | 563790         |
| anti-mouse/rat/human CD278/ICOS APC (clone C398.4A)  | Biologend      | 313510         |
| anti-mouse CD279/PD-1 PE (clone RMP1-14)             | Biologend      | 114118         |
| anti-mouse/human CD44 BV711 (clone IM7)              | Biologend      | 103057         |
| anti-mouse CD69 BV650 (clone H1.2F3)                 | Biologend      | 104541         |
| anti-mouse Foxp3 eF450 (clone FJK-16s)               | Thermo Fisher  | 48-5773-82     |
| anti-mouse/rat/human Foxp3 AF647 (clone 150D)        | Biologend      | 320014         |
| anti-mouse IL-4 PE (clone 11B11)                     | Biologend      | 504104         |
| anti-mouse IL-17a BV421 (clone TC11-18H10.1)         | Biologend      | 506926         |
| anti-mouse IFN $\gamma$ PE/Cy7 (clone XMG1.2)        | Biologend      | 505825         |
| anti-mouse/human T-bet BV605 (clone 4B10)            | Biologend      | 644817         |
| anti-mouse CD117 APC (clone 2B8)                     | Biologend      | 105811         |
| anti-mouse CD115 PerCP/Cy5.5 (clone AFS98)           | Biologend      | 135525         |
| anti-mouse Ly6-G (clone IA8)                         | Biologend      | 127603         |
| anti-mouse CD3e (clone 145-2C11)                     | Biologend      | 100303         |

|                                                               |                |             |
|---------------------------------------------------------------|----------------|-------------|
| anti-mouse CD127 (clone A7R34)                                | Biologend      | 135005      |
| anti-mouse NK1.1 (clone PK136)                                | Biologend      | 108703      |
| anti-mouse/human CD45R (RA3-6B2)                              | Biologend      | 103203      |
| anti-mouse TER-119 (clone TER-119)                            | Biologend      | 116203      |
| anti-mouse TCR $\gamma/\delta$ (clone GL3)                    | Biologend      | 118103      |
| Streptavidin BV421                                            | Biologend      | 405226      |
| anti-human CD45 APC/e780 (clone HI30)                         | Thermo Fisher  | 47-0459-42  |
| anti-human CD3e PerCP/e710 (clone OKT3)                       | Thermo Fisher  | 46-0037-42  |
| anti-human HLA-DR BUV395 (clone G46-6)                        | BD Biosciences | 564040      |
| anti-human CD56 BUV737 (clone NCAM16.2)                       | BD Biosciences | 564448      |
| anti-human CD4 PE/Dazzle 594 (clone S3.5)                     | Biologend      | 100455      |
| anti-human CD8a BV605 (clone RPA-T8)                          | Biologend      | 301039      |
| anti-human CD127 BV650 (clone HIL-7R-M21)                     | BD Biosciences | 563225      |
| anti-human CD38 AF700 (clone HIT2)                            | Biologend      | 303523      |
| anti-human CD25 APC (clone 2A3)                               | BD Biosciences | 340939      |
| anti-human CD45RO PE (clone UCHL1)                            | BD Biosciences | 561889      |
| anti-human PD-1 BV786 (clone EH12)                            | BD Biosciences | 563789      |
| anti-human ICOS BV711 (clone DX29)                            | BD Biosciences | 563833      |
| anti-human FoxP3 PE/Cy7 (clone 236A/E7)                       | Thermo Fisher  | 25-4777-41  |
| anti-human CTLA-4 BV421 (clone BNI3)                          | BD Biosciences | 565931      |
| anti-human/mouse/rat Ki67 AF488 (clone SolA15)                | Thermo Fisher  | 11-5698-82  |
| anti-human CD19 PerCP/e710 (clone H1B19)                      | Thermo Fisher  | 45-0199-42  |
| anti-human CD20 PerCP/e710 (clone 2H7)                        | Thermo Fisher  | 45-0209-42  |
| anti-human CD56 PerCP/e710 (clone CMSSB)                      | Thermo Fisher  | 46-0567-42  |
| anti-human CD64 BUV737 (clone 10.1)                           | BD Biosciences | 564425      |
| anti-human CD11c AF700 (clone 3.9)                            | Thermo Fisher  | 56-0116-42  |
| anti-human CD16 BV605 (clone 3G8)                             | Biologend      | 302039      |
| anti-human CD273/PDL2 BV650 (clone MIH18)                     | BD Biosciences | 563844      |
| anti-human/mouse TREM2 APC (clone 237920)                     | R&D Systems    | FAB17291A   |
| anti-human CD304 PE (clone 12C2 )                             | Biologend      | 354503      |
| anti-human CD1C/BDCA-1 PE/Cy7 (clone L161)                    | Biologend      | 331515      |
| anti-human CD197 BV421 (clone G043H7)                         | Biologend      | 353207      |
| anti-human BDCA-3 FITC (clone AD5-14H12)                      | Miltenyi       | 130-098-843 |
| anti-human PDL1 BV786 (clone MIH1)                            | BD Biosciences | 563739      |
| anti-human CD14 BV711 (clone M5E2)                            | Biologend      | 301837      |
| PE Rat IgG2a, k Isotype Ctrl Antibody (clone RTK2758)         | Biologend      | 400508      |
| PE Rat IgG1, k Isotype Ctrl Antibody (clone RTK2071)          | Biologend      | 400408      |
| APC Armenian Hamster IgG Isotype Ctrl Antibody (clone HTK888) | Biologend      | 400912      |
| BV605 Mouse IgG1, k Isotype Ctrl Antibody (clone MOPC-21)     | Biologend      | 400162      |
| BV421 Mouse IgG2a, k Isotype Ctrl Antibody (clone MOPC-173)   | Biologend      | 400259      |
| anti-mouse CD4 InVivoMab (clone GK1.5)                        | BioXCell       | BE0003-1    |
| anti-mouse CD8 InVivoMab (clone 2.43)                         | BioXCell       | BE0061      |
| anti-mouse CTLA-4 (CD152) InVivoMab (clone 9H10)              | BioXCell       | BE0131      |
| Rat IgG2b, k InVivoMab                                        | BioXCell       | BE0090      |
| Polyclonal Syrian hamster IgG InVivoMab                       | BioXCell       | BE0087      |
| anti-mouse CD16/32 InVivoMab                                  | BioXCell       | BE0307      |



|                                                      |                              |                             |
|------------------------------------------------------|------------------------------|-----------------------------|
| anti-mouse CTLA-4 mouse IgG2c (modified clone 9D9)   | Bristol-Myers-Squibb         |                             |
| anti-mouse CTLA-4 mouse IgG1 (modified clone 9D9)    | Bristol-Myers-Squibb         |                             |
| mouse IgG2c isotype                                  | Bristol-Myers-Squibb         |                             |
| mouse IgG1 isotype                                   | Bristol-Myers-Squibb         |                             |
| Normal Rat Serum                                     | Thermo Fisher                | 10710C                      |
| Armenian Hamster Serum                               | Innovative Research          | IGHMA-SER                   |
| <b>Biological Samples</b>                            |                              |                             |
| Human tumor samples                                  | UC San Francisco             | IRB # 13-12246 and 14-15342 |
| Mouse tissue samples (LN, tumor)                     | UC San Francisco             | IACUC: AN170208             |
| <b>Chemicals, Peptides, and Recombinant Proteins</b> |                              |                             |
| Matrigel GFR, Phenol-red free                        | Corning                      | 356231                      |
| Collagenase, Type I                                  | Worthington Biochemical      | LS004197                    |
| Collagenase, Type IV                                 | Worthington Biochemical      | LS004189                    |
| DNase I                                              | Roche                        | 10104159001                 |
| Liberase TL                                          | Roche                        | 5401020001                  |
| Human TruStain FcX                                   | Biolegend                    | 422302                      |
| Zombie Aqua Fixable Viability Kit                    | Biolegend                    | 423102                      |
| Zombie NIR Fixable Viability Kit                     | Biolegend                    | 423106                      |
| Brilliant Stain Buffer Plus                          | BD Biosciences               | 566385                      |
| Brefeldin A (BFA)                                    | Sigma-Aldrich                | B7651                       |
| Phorbol 12-myristate 13-acetate (PMA)                | Sigma-Aldrich                | P8139                       |
| Ionomycin                                            | Invitrogen                   | I24222                      |
| Monensin Solution (1000X)                            | Thermo Fisher                | 00-4505-51                  |
| Diphtheria Toxin (unnicked)                          | List Biological Laboratories | 150                         |
| FTY720                                               | Cayman Chemical Company      | 10006292                    |
| eBioscience™ Cell Proliferation Dye eFluor™ 670      |                              | 65-0840-85                  |
| Ovalbumin Endofit                                    | Invivogen                    | Vac-pova                    |
| OVA peptide (323-339)                                | Genscript                    | RP10610-1                   |
| <b>Critical Commercial Assays</b>                    |                              |                             |
| Chromium Single Cell 3' Library & Gel Bead Kit V2    | 10X Genomics                 | 120237                      |
| BD Cytotfix                                          | BD Biosciences               | 554655                      |
| Foxp3/Transcription factor staining buffer set       | Thermo Fisher                | 00-5523-00                  |
| EasySep Mouse CD4 <sup>+</sup> T Cell Isolation kit  | STEMCELL Technologies        | 19852                       |
| <b>Deposited Data</b>                                |                              |                             |
| GEO XXXXXX                                           |                              |                             |
| <b>Experimental Models: Cell Lines</b>               |                              |                             |
| B16-F10                                              | ATCC                         | CRL-6475                    |
| B16-ChOVA                                            | UC San Francisco             | N/A                         |

|                                                                                                               |                                                           |                            |
|---------------------------------------------------------------------------------------------------------------|-----------------------------------------------------------|----------------------------|
| B78-ChOVA                                                                                                     | UC San Francisco                                          | N/A                        |
| B16-GM-CSF                                                                                                    | UC San Francisco                                          | N/A                        |
| B16-ZsGreen                                                                                                   | UC San Francisco                                          | N/A                        |
| <b>Experimental Models: Organisms/Strains</b>                                                                 |                                                           |                            |
| Mouse: C57BL/6J                                                                                               | The Jackson Laboratory                                    | 000664                     |
| Mouse: B6 CD45.1 (B6.SJL-Ptprc <sup>a</sup> Pepc <sup>b</sup> /BoyJ)                                          | The Jackson Laboratory                                    | 002014                     |
| Mouse: OT-II (B6.Cg-Tg(TcraTcrb)425Cbn/J)                                                                     | The Jackson Laboratory                                    | 004194                     |
| Mouse: <i>Irf4</i> fl/fl (B6.129S1- <i>Irf4</i> <sup>tm1Rdf</sup> /J)                                         | The Jackson Laboratory                                    | 009380                     |
| Mouse: <i>ActB-Cre</i> (FVB/N- <i>Tmem163</i> <sup>Tg(Actb-cre)2Mrt</sup> /J) received backcrossed to C57/Bl6 | The Jackson Laboratory                                    | 003376                     |
| Mouse: <i>CD11c-Cre</i> (B6.Cg-Tg(Itgax-cre)1-1Reiz/J)                                                        | The Jackson Laboratory                                    | 008068                     |
| Mouse: <i>Cx3cr1</i> <sup>IDTR</sup> (B6N.129P2- <i>Cx3cr1</i> <sup>tm3(DTR)Litt</sup> /J)                    | The Jackson Laboratory                                    | 025629                     |
| Mouse: <i>Ccr7</i> <sup>-/-</sup> (B6.129P2(C)- <i>Ccr7</i> <sup>tm1Rfor</sup> /J)                            | The Jackson Laboratory                                    | 006621                     |
| Mouse: <i>Zbtb46</i> <sup>GFP</sup> (B6.129S6(C)- <i>Zbtb46</i> <sup>tm1.1Kmm</sup> /J)                       | The Jackson Laboratory                                    | 027618                     |
| Mouse: <i>Foxp3</i> <sup>DTR</sup> (B6.129(Cg)- <i>Foxp3</i> <sup>tm3(DTR/GFP)Ayr</sup> /J)                   | The Jackson Laboratory                                    | 016958                     |
| Mouse: <i>Xcr1</i> <sup>DTR</sup> ( <i>Xcr1</i> <sup>tm2(HBEGF/Venus)Ksho</sup> )                             | Tsuneyasu Kaisho, Osaka University                        | MGI: 5544058               |
| Mouse: <i>Foxp3</i> <sup>Cre/YFP</sup> (B6.129(Cg)- <i>Foxp3</i> <sup>tm4(YFP/cre)Ayr</sup> /J)               | The Jackson Laboratory                                    | 016959                     |
| Mouse: <i>Itgb8</i> <sup>fl/fl</sup> ( <i>Itgb8</i> <sup>tm2Lfr</sup> )                                       | Michael Rosenblum, UC San Francisco                       | MGI: 3608910               |
| Mouse: <i>Il-10</i> <sup>fl/fl</sup> ( <i>Il-10</i> flox)                                                     | Susan Kaech, Salk Institute. Generated by Werner Müller.  | PMID: 15534372             |
| Mouse: <i>Areg</i> <sup>-/-</sup> ( <i>Areg</i> <sup>tm1Dle</sup> )                                           | Marco Conti, UC San Francisco. Generated by David C. Lee. | MGI: 2176531               |
| <b>Software and Algorithms</b>                                                                                |                                                           |                            |
| CellRanger 2.0                                                                                                | 10X Genomics                                              | 10xgenomics.com            |
| STAR                                                                                                          | Dobin et.al. 2013                                         | code.google.com/p/na-star/ |
| Seurat                                                                                                        | Satija et al. 2015                                        | satijalab.org/seurat/      |
| R: The Project for Statistical Computing                                                                      |                                                           | r-project.org              |

## Supplemental References

Barry, K.C., Hsu, J., Broz, M.L., Cueto, F.J., Binnewies, M., Combes, A.J., Nelson, A.E., Loo, K., Kumar, R., Rosenblum, M.D., *et al.* (2018). A natural killer–dendritic cell axis defines checkpoint therapy–responsive tumor microenvironments. *Nature medicine*.

Benjamini, Y., and Hochberg, Y. (1995). Controlling the False Discovery Rate: A Practical and Powerful Approach to Multiple Testing. *Journal of the Royal Statistical Society Series B (Methodological)* 57, 289-300.

Broz, M.L., Binnewies, M., Boldajipour, B., Nelson, A.E., Pollack, J.L., Erle, D.J., Barczak, A., Rosenblum, M.D., Daud, A., Barber, D.L., *et al.* (2014). Dissecting the tumor myeloid compartment reveals rare activating antigen-presenting cells critical for T cell immunity. *Cancer Cell* 26, 638-652.

Dobin, A., Davis, C.A., Schlesinger, F., Drenkow, J., Zaleski, C., Jha, S., Batut, P., Chaisson, M., and Gingeras, T.R. (2013). STAR: ultrafast universal RNA-seq aligner. *Bioinformatics (Oxford, England)* 29, 15-21.

Dranoff, G., Jaffee, E., Lazenby, A., Golumbek, P., Levitsky, H., Brose, K., Jackson, V., Hamada, H., Pardoll, D., and Mulligan, R.C. (1993). Vaccination with irradiated tumor cells engineered to secrete murine granulocyte-macrophage colony-stimulating factor stimulates potent, specific, and long-lasting anti-tumor immunity. *Proceedings of the National Academy of Sciences of the United States of America* 90, 3539-3543.

Engelhardt, J.J., Boldajipour, B., Beemiller, P., Pandurangi, P., Sorensen, C., Werb, Z., Egeblad, M., and Krummel, M.F. (2012). Marginating dendritic cells of the tumor

microenvironment cross-present tumor antigens and stably engage tumor-specific T cells. *Cancer Cell* 21, 402-417.

GeurtsvanKessel, C.H., Willart, M.A., van Rijt, L.S., Muskens, F., Kool, M., Baas, C., Thielemans, K., Bennett, C., Clausen, B.E., Hoogsteden, H.C., *et al.* (2008). Clearance of influenza virus from the lung depends on migratory langerin<sup>+</sup>CD11b<sup>-</sup> but not plasmacytoid dendritic cells. *The Journal of experimental medicine* 205, 1621-1634.

Headley, M.B., Bins, A., Nip, A., Roberts, E.W., Looney, M.R., Gerard, A., and Krummel, M.F. (2016). Visualization of immediate immune responses to pioneer metastatic cells in the lung. *Nature* 531, 513-517.

Heng, T.S., and Painter, M.W. (2008). The Immunological Genome Project: networks of gene expression in immune cells. *Nat Immunol* 9, 1091-1094.

Kowalczyk, M.S., Tirosh, I., Heckl, D., Rao, T.N., Dixit, A., Haas, B.J., Schneider, R.K., Wagers, A.J., Ebert, B.L., and Regev, A. (2015). Single-cell RNA-seq reveals changes in cell cycle and differentiation programs upon aging of hematopoietic stem cells. *Genome research* 25, 1860-1872.

Macosko, E.Z., Basu, A., Satija, R., Nemesh, J., Shekhar, K., Goldman, M., Tirosh, I., Bialas, A.R., Kamitaki, N., Martersteck, E.M., *et al.* (2015). Highly Parallel Genome-wide Expression Profiling of Individual Cells Using Nanoliter Droplets. *Cell* 161, 1202-1214.

Ritchie, M.E., Phipson, B., Wu, D., Hu, Y., Law, C.W., Shi, W., and Smyth, G.K. (2015). limma powers differential expression analyses for RNA-sequencing and microarray studies. *Nucleic acids research* 43, e47.

Roberts, Edward W., Broz, Miranda L., Binnewies, M., Headley, Mark B., Nelson, Amanda E., Wolf, Denise M., Kaisho, T., Bogunovic, D., Bhardwaj, N., and Krummel, Matthew F. (2016). Critical Role for CD103+/CD141+ Dendritic Cells Bearing CCR7 for Tumor Antigen Trafficking and Priming of T Cell Immunity in Melanoma. *Cancer Cell* 30, 324-336.

Satija, R., Farrell, J.A., Gennert, D., Schier, A.F., and Regev, A. (2015). Spatial reconstruction of single-cell gene expression data. *Nature biotechnology* 33, 495-502.

Thomas, P.G., Brown, S.A., Yue, W., So, J., Webby, R.J., and Doherty, P.C. (2006). An unexpected antibody response to an engineered influenza virus modifies CD8+ T cell responses. *Proceedings of the National Academy of Sciences of the United States of America* 103, 2764-2769.
